# Supplementary material
Source: PubMed Central journal article supplement (PMC4025768)

# Supplementary Information

## Novel 4-aminoquinoline-pyrimidine based hybrids with improved *in vitro* and *in vivo* antimalarial activity

Sunny Manohar,<sup>+</sup> U. Chinna Rajesh,<sup>+</sup> Shabana I. Khan,<sup>‡,§</sup> Babu L. Tekwani,<sup>‡,#</sup> and Diwan S. Rawat<sup>\*†</sup>

<sup>+</sup>Department of Chemistry, University of Delhi, Delhi-110007, INDIA

<sup>‡</sup>National Centre for Natural Products Research,

<sup>§</sup>Department of Pharmacognosy, and <sup>#</sup>Department of Pharmacology, School of Pharmacy,  
University of Mississippi, MS-38677, USA

### List of Contents

|                                                                       |       |
|-----------------------------------------------------------------------|-------|
| Experimental details and characterization of new compounds.....       | 2-8   |
| Assay for <i>in-vitro</i> antimalarial activity and cytotoxicity..... | 8-9   |
| Crystallographic data.....                                            | 9-10  |
| References.....                                                       | 11    |
| <sup>1</sup> H and <sup>13</sup> C NMR of compounds.....              | 12-43 |
| HPLC of compounds.....                                                | 44-51 |

## Experimental

### Chemistry

All of the chemicals used in the synthesis were purchased from Sigma-Aldrich and were used as such. Thin layer chromatography was used to monitor the progress of the reactions and checked by precoated TLC plates (E. Merck Kieselgel 60 F<sub>254</sub>) with spots being visualized by iodine vapors. Compounds were purified over silica gel (60-120 mesh) column or recrystallized with suitable solvents. Solvents were distilled before using for purification purposes. Melting points were recorded on an ERS automated melting point apparatus and are uncorrected. IR spectra were recorded using Perkin-Elmer and Bruker FT-IR and the values are expressed as  $\lambda_{\text{max}}$  cm<sup>-1</sup>. Mass spectral data were recorded on a Jeol-AccuTOF JMS-T100LC and micromass LCT Mass Spectrometer/Data system. The <sup>1</sup>H NMR and <sup>13</sup>C NMR spectra were recorded on Jeol Spectrospin spectrometer at 400 MHz and 100 MHz respectively using TMS as an internal standard. The chemical shift values are recorded on  $\delta$  scale and the coupling constants (J) are in Hz. HPLC was done using Waters HPLC system, 25 cm C18 column, and a run time of 60 min.

### General procedure for the synthesis of compounds **6a-d** and **7a-d**

To a well stirred solution of 2,4-dichloro-6-methyl-pyrimidine (2.0 g, 12.2 mmol) and triethylamine (2.48 g, 24.5 mmol) in ethanol (50 ml) at room temperature was added diamines **5a-d** (12.2 mmol). The reaction mixture was allowed to stir overnight at room temperature. After completion of reaction as evident by TLC, reaction mixture was poured into ice cold water (250 ml) and precipitate thus formed was filtered and washed with excess of water at vacuum pump. The crude precipitate was then dried, dissolved in 100 ml of CHCl<sub>3</sub> and extracted with water (2 × 500 ml) and finally with brine. Excess of solvent was evaporated to dryness under vacuum and the crude product thus obtained was purified by SiO<sub>2</sub> column using MeOH/CHCl<sub>3</sub> as eluent to yield respective compounds **6a-d** and **7a-d**.

### **N-(2-chloro-6-methyl-pyrimidin-4-yl)-N'-(7-chloro-quinolin-4-yl)-ethane-1,2-diamine**

**(6a):** White solid; Yield: 75 %; mp 220-222 °C; IR (cm<sup>-1</sup>, KBr): 3269, 2954, 1581, 1434, 1234, 1105, 848; <sup>1</sup>H NMR (400 MHz, DMSO-*d*<sub>6</sub>): 2.20 (s, 3H), 3.39-3.46 (m, 4H), 6.57 (s, 1H), 6.71 (d, 1H, *J* = 5.5 Hz), 7.37 (brs, 1H), 7.41 (dd, 1H, *J* = 11.0 Hz, 2.0 Hz), 7.65 (brs, 1H), 7.74 (d, 1H, *J* = 2.3 Hz), 8.15 (d, 1H, *J* = 8.7 Hz), 8.37 (d, 1H, *J* = 5.5 Hz); ESI-MS

(m/z): 348.10 (M+H)<sup>+</sup>; Anal. Calcd for C<sub>16</sub>H<sub>15</sub>C<sub>12</sub>N<sub>5</sub>: C, 55.19; H, 4.34; N, 20.11; Found: C, 55.28; H, 4.30; N, 20.13. HPLC purity: 98.6 %

**N-(2-Chloro-6-methyl-pyrimidin-4-yl)-N'-(7-chloro-quinolin-4-yl)-propane-1,3-diamine (6b):** Pale yellow solid; Yield: 78 %; mp 192-194 °C; IR (cm<sup>-1</sup>, KBr): 3263, 3062, 2963, 1583, 1363, 1280, 1100, 848; <sup>1</sup>H NMR (400 MHz, DMSO-*d*<sub>6</sub>): 1.88 (quin, 2H), 2.18 (s, 3H), 3.28-3.33 (m, 4H), 6.44 (d, 1H, *J* = 5.4 Hz), 6.53 (s, 1H), 7.28 (brs, 1H), 7.42 (dd, 1H, *J* = 11.0 Hz, 2.0 Hz), 7.63 (brs, 1H), 7.75 (d, 1H, *J* = 2.3 Hz), 8.23 (d, 1H, *J* = 9.1 Hz), 8.35 (d, 1H, *J* = 5.5 Hz); <sup>13</sup>C NMR (100 MHz, DMSO-*d*<sub>6</sub>): 24.48, 28.16, 39.80, 41.05, 99.58, 108.78, 118.39, 124.94, 124.98, 128.39, 134.30, 149.96, 150.94, 152.76, 160.84, 163.03, 170.59; ESI-MS (m/z): 362.11 (M+H)<sup>+</sup>; Anal. Calcd for C<sub>17</sub>H<sub>17</sub>C<sub>12</sub>N<sub>5</sub>: C, 56.36; H, 4.73; N, 19.33 Found: C, 56.42; H, 4.74; N, 19.38; HPLC purity: 98.4 %

**N-(2-Chloro-6-methyl-pyrimidin-4-yl)-N'-(7-chloro-quinolin-4-yl)-butane-1,4-diamine (6c):** White solid; Yield: 70 %; mp 156-158 °C; IR (cm<sup>-1</sup>, KBr): 3286, 2955, 1581, 1367, 1290, 1137, 1102, 871; <sup>1</sup>H NMR (400 MHz, CDCl<sub>3</sub>): 1.73-1.87 (m, 4H), 2.28 (s, 3H), 3.37 (q, 2H), 3.52 (q, 2H), 5.13 (brs, 1H), 5.30 (brs, 1H), 6.41 (d, 1H, *J* = 5.5 Hz), 6.45 (s, 1H), 7.34 (dd, 1H, *J* = 11.0 Hz, 2.0 Hz), 7.66 (d, 1H, *J* = 8.7 Hz), 7.95 (d, 1H, *J* = 2.3 Hz), 8.52 (d, 1H, *J* = 5.5 Hz); ESI-MS (m/z): 376.33 (M+H)<sup>+</sup>; Anal. Calcd for C<sub>18</sub>H<sub>19</sub>C<sub>12</sub>N<sub>5</sub>: C, 57.45; H, 5.09; N, 18.61 Found: C, 57.39; H, 5.16; N, 18.62; HPLC purity: 99.0 %

**N-(2-Chloro-6-methyl-pyrimidin-4-yl)-N'-(7-chloro-quinolin-4-yl)-hexane-1,6-diamine (6d):** Off white solid; Yield: 80 %; mp 103-105 °C; IR (cm<sup>-1</sup>, KBr): 3277, 3065, 2937, 1581, 1366, 1291, 1078, 849, 797; <sup>1</sup>H NMR (400 MHz, CDCl<sub>3</sub>): 1.45-1.55 (m, 4H), 1.60-1.67 (m, 2H), 1.73-1.81 (m, 2H), 2.29 (s, 3H), 3.31 (q, 4H), 3.43 (q, 4H), 4.96 (brs, 1H), 5.14 (brs, 1H), 6.41 (d, 1H, *J* = 5.5 Hz), 6.43 (s, 1H), 7.36 (dd, 1H, *J* = 11.0 Hz, 2.0 Hz), 7.65 (d, 1H, *J* = 8.7 Hz), 7.96 (d, 1H, *J* = 2.3 Hz), 8.53 (d, 1H, *J* = 5.5 Hz); ESI-MS (m/z): 404.11 (M+H)<sup>+</sup>; Anal. Calcd for C<sub>20</sub>H<sub>23</sub>C<sub>12</sub>N<sub>5</sub>: C, 59.41; H, 5.73; N, 17.32 Found: C, 59.44; H, 5.71; N, 17.31; HPLC purity: 97.1 %

**N-(4-chloro-6-methyl-pyrimidin-2-yl)-N'-(7-chloro-quinolin-4-yl)-ethane-1,2-diamine (7a):** White solid; Yield: 22 %; mp 208-210 °C; IR (cm<sup>-1</sup>, KBr): 3257, 2969, 1584, 1432, 1368, 1248, 1140, 973; <sup>1</sup>H NMR (400 MHz, DMSO-*d*<sub>6</sub>): 2.13 (s, 3H), 3.41-3.48 (m, 4H), 6.25 (s, 1H), 6.70 (d, 1H, *J* = 5.4 Hz), 7.32 (brs, 1H), 7.41 (dd, 1H, *J* = 11.0 Hz, 2.0 Hz), 7.74 (d, 1H, *J* = 2.3 Hz), 7.91 (brs, 1H), 8.16 (d, 1H, *J* = 8.7 Hz), 8.37 (d, 1H, *J* = 5.5 Hz); <sup>13</sup>C NMR (100 MHz, DMSO-*d*<sub>6</sub>): 22.87, 38.29, 41.33, 98.89, 102.94, 117.44, 124.00, 124.17, 127.42, 133.49, 148.95, 150.11, 151.80, 159.46, 164.05, 165.43; ESI-MS (m/z): 348.10

(M+H)<sup>+</sup>; Anal. Calcd for C<sub>16</sub>H<sub>15</sub>C<sub>12</sub>N<sub>5</sub>: C, 55.19; H, 4.34; N, 20.11; Found C, 55.15; H, 4.32; N, 20.21; HPLC purity: 98.7 %

**N-(4-Chloro-6-methyl-pyrimidin-2-yl)-N'-(7-chloro-quinolin-4-yl)-propane-1,3-diamine (7b):** Pale yellow solid; Yield: 15 %; mp 172-174 °C; IR (cm<sup>-1</sup>, KBr): 3264, 3063, 2964, 1583, 1364, 1280, 1100, 863; <sup>1</sup>H NMR (400 MHz, DMSO-*d*<sub>6</sub>): 1.89 (quin, 2H), 2.14 (s, 3H), 3.24-3.35 (m, 4H), 6.25 (s, 1H), 6.46 (d, 1H, *J* = 5.4 Hz), 7.28 (brs, 1H), 7.43 (dd, 1H, *J* = 11.0 Hz, 2.0 Hz), 7.76 (d, 1H, *J* = 2.3 Hz), 7.81 (brs, 1H), 8.25 (d, 1H, *J* = 9.1 Hz), 8.37 (d, 1H, *J* = 9.1 Hz); <sup>13</sup>C NMR (100 MHz, DMSO-*d*<sub>6</sub>): 22.85, 27.22, 38.01, 40.12, 98.71, 102.79, 117.48, 124.09, 127.46, 133.43, 149.03, 150.04, 151.84, 159.51, 164.00, 165.04, 167.75; ESI-MS (m/z): 362.12 (M+H)<sup>+</sup>; Anal. Calcd for C<sub>17</sub>H<sub>17</sub>C<sub>12</sub>N<sub>5</sub>: C, 56.36; H, 4.73; N, 19.33; Found: C, 56.37; H, 4.76; N, 19.41.

**N-(4-Chloro-6-methyl-pyrimidin-2-yl)-N'-(7-chloro-quinolin-4-yl)-butane-1,4-diamine (7c):** White solid; Yield: 25 %; mp 175-177 °C; IR (cm<sup>-1</sup>, KBr): 3251, 3127, 2957, 1589, 1367, 1234, 1139, 972, 847; <sup>1</sup>H NMR (400 MHz, CDCl<sub>3</sub>): 1.79-1.82 (m, 4H), 2.31 (s, 3H), 3.36-3.40 (m, 4H), 5.13 (brs, 1H), 5.30 (brs, 1H), 6.06 (s, 1H), 6.39 (d, 1H, *J* = 5.5 Hz), 7.35 (dd, 1H, *J* = 11.0 Hz, 2.0 Hz), 7.66 (d, 1H, *J* = 8.7 Hz), 7.95 (d, 1H, *J* = 2.3 Hz), 8.51 (d, 1H, *J* = 5.5 Hz); <sup>13</sup>C NMR (100 MHz, CDCl<sub>3</sub>): 22.71, 24.83, 25.97, 41.88, 97.93, 102.13, 116.81, 122.29, 123.74, 127.18, 133.63, 148.36, 149.67, 151.09, 159.26, 163.55, 164.25; ESI-MS (m/z): 376.16 (M+H)<sup>+</sup>; Anal. Calcd for C<sub>18</sub>H<sub>19</sub>C<sub>12</sub>N<sub>5</sub>: C, 57.45; H, 5.09; N, 18.61; Found: C, 57.50; H, 5.10; N, 18.67.

**N-(4-Chloro-6-methyl-pyrimidin-2-yl)-N'-(7-chloro-quinolin-4-yl)-hexane-1,6-diamine (7d):** White solid; Yield: 18 %; mp 99-101 °C; IR (cm<sup>-1</sup>, KBr): 3108, 2941, 1580, 1366, 1280, 1221, 1163, 972; <sup>1</sup>H NMR (400 MHz, CDCl<sub>3</sub>): 1.41-1.53 (m, 4H), 1.59-1.67 (m, 2H), 1.73- 1.79 (m, 2H), 2.30 (s, 3H), 3.27-3.32 (m, 4H), 4.97 (brs, 1H), 5.16 (brs, 1H), 6.04 (s, 1H), 6.39 (d, 1H, *J* = 5.5 Hz), 7.34 (dd, 1H, *J* = 11.0 Hz, 2.0 Hz), 7.64 (d, 1H, *J* = 8.7 Hz), 7.94 (d, 1H, *J* = 2.3 Hz), 8.51 (d, 1H, *J* = 5.5 Hz); ESI-MS (m/z): 404.38 (M+H)<sup>+</sup>; Anal. Calcd for C<sub>20</sub>H<sub>23</sub>C<sub>12</sub>N<sub>5</sub>: C, 59.41; H, 5.73; N, 17.32; Found: C, 59.35; H, 5.80; N, 17.31; HPLC purity: 98.1 %

#### **General Procedure for the synthesis of compounds 8a-n**

In a 100 ml round bottom flask, compound **6a-d** (1 eq.) was taken and dissolved in 10 ml of DMF. To this, a solution of respective amine (3 eq.) in DMF (5 ml) was added dropwise. Reaction mixture was allowed to stir at 100-120 °C for 10 hours monitored by TLC. After completion, water (50 ml) was added to reaction mixture and it was extracted with EtOAc (2 × 25 ml). Organic layer was then collected, washed with water (2 × 100 ml) and brine, dried

over Na<sub>2</sub>SO<sub>4</sub> and finally excess of solvent was evaporated under vacuum. The crude residue thus obtained was purified by SiO<sub>2</sub> column using MeOH/CHCl<sub>3</sub> as eluent to afford respective compounds **8a-n**.

**N-(7-chloro-quinolin-4-yl)-N'-(6-methyl-2-piperidin-1-yl-pyrimidin-4-yl)-ethane-1,2-diamine (8a):** White solid. Yield: 85 %; mp 177-179 °C; IR (cm<sup>-1</sup>, KBr): 3385, 3344, 2941, 1580, 1447, 1331, 1237, 1141, 790; <sup>1</sup>H NMR (400 MHz, DMSO-*d*<sub>6</sub>): 1.36-1.49 (m, 6H), 2.02 (s, 3H), 3.31-3.41 (m, 8H), 5.85 (s, 1H), 6.56-6.72 (m, 2H), 7.34 (dd, 1H, *J* = 11.0 Hz, 2.0 Hz), 7.41 (brs, 1H), 7.68 (d, 1H, *J* = 2.3 Hz); 8.07 (d, 1H, *J* = 8.7 Hz), 8.28 (d, 1H, *J* = 5.5 Hz); ESI-MS (*m/z*): 397.22 (M+H)<sup>+</sup>; Anal. Calcd for C<sub>21</sub>H<sub>25</sub>ClN<sub>6</sub>: C, 63.55; H, 6.35; N, 21.17; Found: C, 63.53; H, 6.39; N, 21.26; HPLC purity: 99.7 %

**N-(7-Chloro-quinolin-4-yl)-N'-(6-methyl-2-piperidin-1-yl-pyrimidin-4-yl)-propane-1,3-diamine (8b):** Pale yellow solid; Yield: 82 %; mp 194-196 °C; IR (cm<sup>-1</sup>, KBr): 3241, 3079, 1940, 1615, 1587, 1361, 1208, 1001, 804; <sup>1</sup>H NMR (400 MHz, CDCl<sub>3</sub>): 1.46-1.56 (m, 6H), 1.87 (quin, 2H), 2.16 (s, 3H), 3.36 (q, 2H), 4.45 (t, 4H), 3.49 (q, 2H), 4.86 (brs, 1H), 5.72 (s, 1H), 5.92 (brs, 1H), 6.32 (d, 1H, *J* = 5.4 Hz), 7.22 (dd, 1H, *J* = 11.0 Hz, 2.0 Hz), 7.66 (d, 1H, *J* = 8.7 Hz), 7.85 (d, 1H, *J* = 2.3 Hz), 8.41 (d, 1H, *J* = 5.5 Hz); <sup>13</sup>C NMR (100 MHz, CDCl<sub>3</sub>): 24.36, 24.67, 25.45, 29.06, 38.55, 40.34, 44.89, 92.36, 98.86, 117.43, 121.55, 124.83, 128.53, 134.63, 149.18, 149.91, 151.96, 162.42, 162.84, 165.62; ESI-MS (*m/z*): 411.23 (M+H)<sup>+</sup>; Anal. Calcd for C<sub>22</sub>H<sub>27</sub>ClN<sub>6</sub>: C, 64.30; H, 6.62; N, 20.45; Found: C, 64.42; H, 6.68; N, 20.41; HPLC purity: 99.1 %

**N-(7-Chloro-quinolin-4-yl)-N'-(6-methyl-2-piperidin-1-yl-pyrimidin-4-yl)-butane-1,4-diamine (8c):** White solid; Yield: 88 %; mp 187-189 °C; IR (cm<sup>-1</sup>, KBr): 3247, 3067, 2935, 1581, 1364, 1210, 1079, 848; <sup>1</sup>H NMR (400 MHz, CDCl<sub>3</sub>): 1.49-1.65 (m, 6H), 1.73-1.79 (m, 2H), 1.83-1.89 (m, 2H), 2.17 (s, 3H), 3.35 (q, 2H), 3.45-3.52 (m, 6H), 4.79 (brs, 1H), 5.25 (brs, 1H), 5.76 (s, 1H), 6.38 (d, 1H, *J* = 5.5 Hz), 7.31 (dd, 1H, *J* = 11.0 Hz, 2.0 Hz), 7.63 (d, 1H, *J* = 8.7 Hz), 7.93 (d, 1H, *J* = 2.3 Hz), 8.50 (d, 1H, *J* = 5.5 Hz); <sup>13</sup>C NMR (100 MHz, CDCl<sub>3</sub>): 24.09, 24.67, 25.43, 25.75, 27.64, 40.64, 43.02, 44.87, 91.91, 98.92, 117.14, 121.21, 125.04, 128.56, 134.66, 149.05, 149.76, 151.93, 162.17, 162.90, 165.67; ESI-MS (*m/z*): 425.31 (M+H)<sup>+</sup>; Anal. Calcd for C<sub>23</sub>H<sub>29</sub>ClN<sub>6</sub>: C, 65.00; H, 6.88; N, 19.78; Found: C, 64.98; H, 6.90; N, 19.81; HPLC purity: 97.9 %

**N-(7-Chloro-quinolin-4-yl)-N'-(6-methyl-2-piperidin-1-yl-pyrimidin-4-yl)-hexane-1,6-diamine (8d):** Light brown solid; Yield: 82 %; mp 97-99 °C; IR (cm<sup>-1</sup>, KBr): 3314, 2933, 1579, 1368, 1232, 1134, 983, 853, 789; <sup>1</sup>H NMR (400 MHz, CDCl<sub>3</sub>): 1.47-1.64 (m, 12H), 1.72-1.79 (m, 2H), 2.17 (s, 3H), 3.29 (q, 2H), 3.39 (q, 2H), 3.54 (t, 4H), 4.76 (brs, 1H), 5.07

(brs, 1H), 5.74 (s, 1H), 6.39 (d, 1H,  $J = 5.5$  Hz), 7.34 (dd, 1H,  $J = 11.0$  Hz, 2.0 Hz), 7.67 (d, 1H,  $J = 8.7$  Hz), 7.95 (d, 1H,  $J = 2.3$  Hz), 8.51 (d, 1H,  $J = 5.5$  Hz); ESI-MS ( $m/z$ ): 453.35 ( $M+H$ )<sup>+</sup>; Anal. Calcd for C<sub>25</sub>H<sub>33</sub>ClN<sub>6</sub>: C, 66.28; H, 7.34; N, 18.55; Found: C, 66.32; H, 7.35; N, 18.49; HPLC purity: 96.9 %

**N-(7-Chloro-quinolin-4-yl)-N'-(6-methyl-2-morpholin-4-yl-pyrimidin-4-yl)-ethane-1,2-diamine (8e):** Pale yellow solid; Yield: 86 %; mp 165-167 °C; IR (cm<sup>-1</sup>, KBr): 3391, 3245, 2954, 1585, 1438, 1228, 1110, 993; <sup>1</sup>H NMR (400 MHz, DMSO-*d*<sub>6</sub>): 2.09 (s, 3H), 3.35-3.48 (m, 8H), 3.57 (t, 4H), 5.91 (s, 1H), 6.62-6.70 (m, 2H), 7.41 (dd, 1H,  $J = 11.0$  Hz, 2.0 Hz), 7.44 (brs, 1H), 7.74 (d, 1H,  $J = 2.3$  Hz), 8.14 (d, 1H,  $J = 9.1$  Hz), 8.35 (d, 1H,  $J = 5.5$  Hz); ESI-MS ( $m/z$ ): 399.20 ( $M+H$ )<sup>+</sup>; Anal. Calcd for C<sub>20</sub>H<sub>23</sub>ClN<sub>6</sub>O: C, 60.22; H, 5.81; N, 21.07; Found: C, 60.34; H, 5.79; N, 21.09; HPLC purity: 90.8 %

**N-(7-Chloro-quinolin-4-yl)-N'-(6-methyl-2-morpholin-4-yl-pyrimidin-4-yl)-propane-1,3-diamine (8f):** White solid; Yield: 82 %; mp 165-167 °C; IR (cm<sup>-1</sup>, KBr): 3233, 3063, 2954, 1576, 1366, 1247, 1123, 791; <sup>1</sup>H NMR (400 MHz, CDCl<sub>3</sub>): 1.92 (quin, 2H), 2.20 (s, 3H), 3.39 (q, 2H), 3.47 (t, 4H), 3.52 (q, 2H), 3.66 (t, 4H), 5.22 (brs, 1H), 5.71 (s, 1H), 5.95 (brs, 1H), 6.34 (d, 1H,  $J = 5.4$  Hz), 7.25 (dd, 1H,  $J = 11.0$  Hz, 2.2 Hz), 7.72 (d, 1H,  $J = 8.7$  Hz), 7.89 (d, 1H,  $J = 2.3$  Hz), 8.44 (d, 1H,  $J = 5.5$  Hz); <sup>13</sup>C NMR (100 MHz, CDCl<sub>3</sub>): 24.10, 28.85, 38.56, 40.34, 44.09, 66.46, 92.27, 98.85, 117.35, 121.52, 124.93, 128.46, 134.73, 149.06, 149.90, 151.83, 161.87, 163.27, 165.70; ESI-MS ( $m/z$ ): 413.21 ( $M+H$ )<sup>+</sup>; Anal. Calcd for C<sub>21</sub>H<sub>25</sub>ClN<sub>6</sub>O: C, 61.08; H, 6.10; N, 20.35; Found: C, 61.12; H, 6.17; N, 20.40; HPLC purity: 99.5 %

**N-(7-Chloro-quinolin-4-yl)-N'-(6-methyl-2-morpholin-4-yl-pyrimidin-4-yl)-butane-1,4-diamine (8g):** White solid; Yield: 80 %; mp 214-216 °C; IR (cm<sup>-1</sup>, KBr): 3256, 3066, 2964, 1583, 1367, 1245, 1122, 994, 790; <sup>1</sup>H NMR (400 MHz, CDCl<sub>3</sub>): 1.72-1.80 (m, 2H), 1.83-1.91 (m, 2H), 2.20 (s, 3H), 3.36 (q, 2H), 3.48 (q, 2H), 3.52 (t, 4H), 3.71 (t, 4H), 4.83 (brs, 1H), 5.19 (brs, 1H), 5.75 (s, 1H), 6.40 (d, 1H,  $J = 5.5$  Hz), 7.32 (dd, 1H,  $J = 11.0$  Hz, 2.0 Hz), 7.63 (d, 1H,  $J = 8.7$  Hz), 7.95 (d, 1H,  $J = 2.3$  Hz), 8.51 (d, 1H,  $J = 5.5$  Hz); <sup>13</sup>C NMR (100 MHz, CDCl<sub>3</sub>): 22.75, 24.18, 25.83, 41.39, 42.69, 64.93, 89.96, 97.19, 122.10, 122.28, 122.80, 126.34, 132.68, 147.77, 149.11, 150.43, 160.69, 161.99, 164.64; ESI-MS ( $m/z$ ): 427.29 ( $M+H$ )<sup>+</sup>; Anal. Calcd for C<sub>22</sub>H<sub>27</sub>ClN<sub>6</sub>O: C, 61.89; H, 6.37; N, 19.68; Found: C, 61.99; H, 6.45; N, 19.70; HPLC purity: 96.2 %

**N-(7-Chloro-quinolin-4-yl)-N'-(6-methyl-2-morpholin-4-yl-pyrimidin-4-yl)-hexane-1,6-diamine (8h):** Pale yellow solid; Yield: 90 %; mp 107-109 °C; IR (cm<sup>-1</sup>, KBr): 3245, 2935, 2855, 1579, 1366, 1220, 1123, 994, 789; <sup>1</sup>H NMR (400 MHz, CDCl<sub>3</sub>): 1.44-1.46 (m, 4H),

1.55-1.62 (m, 2H), 1.69-1.74 (m, 2H), 2.20 (s, 3H), 3.27 (q, 2H), 3.36 (q, 2H), 3.54 (t, 4H), 3.78 (t, 4H), 4.88 (brs, 1H), 5.26 (brs, 1H), 5.73 (s, 1H), 6.37 (d, 1H,  $J = 5.1$  Hz), 7.31 (dd, 1H,  $J = 11.0$  Hz, 2.0 Hz), 7.70 (d, 1H,  $J = 8.7$  Hz), 7.93 (d, 1H,  $J = 2.2$  Hz), 8.50 (d, 1H,  $J = 5.1$  Hz);  $^{13}\text{C}$  NMR (100 MHz,  $\text{CDCl}_3$ ): 24.13, 26.62, 26.82, 28.66, 29.60, 41.04, 43.06, 44.09, 66.53, 91.58, 98.93, 117.07, 121.00, 125.08, 128.62, 134.67, 149.04, 149.68, 151.94, 162.00, 163.45, 166.31; ESI-MS ( $m/z$ ): 456.21 ( $\text{M}+\text{H}$ )<sup>+</sup>; Anal. Calcd for  $\text{C}_{24}\text{H}_{31}\text{ClN}_6\text{O}$ : C, 63.35; H, 6.87; N, 18.47; Found: C, 63.29; H, 6.91; N, 18.46; HPLC purity: 99.5 %

**N-(7-Chloro-quinolin-4-yl)-N'-[6-methyl-2-(4-methyl-piperazin-1-yl)-pyrimidin-4-yl]-ethane-1,2-diamine (8i):** White solid 83 %; Yield: ; mp 134-136 °C; IR ( $\text{cm}^{-1}$ , KBr): 3385, 3066, 2940, 1581, 1445, 1305, 1139, 997, 793;  $^1\text{H}$  NMR (400 MHz,  $\text{CDCl}_3$ ): 2.29 (s, 3H), 2.30 (s, 3H), 2.42 (t, 4H), 3.41 (q, 2H), 3.62 (t, 4H), 3.84 (q, 2H), 5.51 (brs, 1H), 5.87 (s, 1H), 6.30 (d, 1H,  $J = 5.5$  Hz), 6.90 (brs, 1H), 7.21 (dd, 1H,  $J = 11.0$  Hz, 2.0 Hz), 7.55 (d, 1H,  $J = 8.7$  Hz), 7.89 (d, 1H,  $J = 2.3$  Hz), 8.46 (d, 1H,  $J = 5.5$  Hz); ESI-MS ( $m/z$ ): 412.26 ( $\text{M}+\text{H}$ )<sup>+</sup>; Anal. Calcd for  $\text{C}_{21}\text{H}_{26}\text{ClN}_7$ : C, 61.23; H, 6.36; N, 23.80; Found: C, 61.18; H, 6.51; N, 23.85; HPLC purity: 99.4 %

**N-(7-Chloro-quinolin-4-yl)-N'-[6-methyl-2-(4-methyl-piperazin-1-yl)-pyrimidin-4-yl]-propane-1,3-diamine (8j):** Off white solid; Yield: 80 %; mp 176-178 °C; IR ( $\text{cm}^{-1}$ , KBr): 3257, 3065, 2938, 1580, 1369, 1236, 1142, 1001, 789;  $^1\text{H}$  NMR (400 MHz,  $\text{CDCl}_3$ ): 1.94 (quin, 2H), 2.21 (s, 3H), 2.28 (s, 3H), 2.36 (t, 4H), 3.42 (q, 2H), 3.52-3.56 (m, 6H), 5.32 (brs, 1H), 5.74 (s, 1H), 6.01 (brs, 1H), 6.37 (d, 1H,  $J = 5.4$  Hz), 7.27 (dd, 1H,  $J = 11.0$  Hz, 2.0 Hz), 7.75 (d, 1H,  $J = 8.7$  Hz), 7.91 (d, 1H,  $J = 2.3$  Hz), 8.46 (d, 1H,  $J = 5.5$  Hz); ESI-MS ( $m/z$ ): 426.32 ( $\text{M}+\text{H}$ )<sup>+</sup>; Anal. Calcd for  $\text{C}_{22}\text{H}_{28}\text{ClN}_7$ : C, 62.03; H, 6.63; N, 23.02; Found: C, 62.11; H, 6.68; N, 22.95; HPLC purity: 99.3 %

**N-(7-Chloro-quinolin-4-yl)-N'-[6-methyl-2-(4-methyl-piperazin-1-yl)-pyrimidin-4-yl]-butane-1,4-diamine (8k):** White solid; Yield: 87 %; mp 183-185 °C; IR ( $\text{cm}^{-1}$ , KBr): 3248, 3072, 2927, 1581, 1367, 1280, 1139, 997, 790;  $^1\text{H}$  NMR (400 MHz,  $\text{CDCl}_3$ ): 1.75-1.91 (m, 4H), 2.19 (s, 3H), 2.29 (s, 3H), 2.39 (t, 4H), 3.36 (q, 2H), 3.48 (q, 2H), 3.56 (t, 4H), 4.86 (brs, 1H), 5.23 (brs, 1H), 5.77 (s, 1H), 6.39 (d, 1H,  $J = 5.5$  Hz), 7.32 (dd, 1H,  $J = 11.0$  Hz, 2.0 Hz), 7.64 (d, 1H,  $J = 8.7$  Hz), 7.94 (d, 1H,  $J = 2.3$  Hz), 8.51 (d, 1H,  $J = 5.5$  Hz);  $^{13}\text{C}$  NMR (100 MHz,  $\text{CDCl}_3$ ): 24.15, 25.79, 27.65, 40.65, 43.04, 43.64, 46.10, 54.61, 92.00, 98.97, 117.12, 121.09, 125.09, 128.69, 134.67, 149.11, 149.68, 151.99, 162.13, 163.16, 166.16; ESI-MS ( $m/z$ ): 440.33 ( $\text{M}+\text{H}$ )<sup>+</sup>; Anal. Calcd for  $\text{C}_{23}\text{H}_{30}\text{ClN}_7$ : C, 62.79; H, 6.87; N, 22.28; Found: C, 62.80; H, 6.85; N, 22.30; HPLC purity: 97.0 %

**N-(7-Chloro-quinolin-4-yl)-N'-[6-methyl-2-(4-methyl-piperazin-1-yl)-pyrimidin-4-yl]-hexane-1,6-diamine (8l):** Light brown solid; Yield: 85 %; mp 152-154 °C; IR (cm<sup>-1</sup>, KBr): 3266, 3068, 2931, 1580, 1367, 1279, 1164, 993, 789; <sup>1</sup>H NMR (400 MHz, CDCl<sub>3</sub>): 1.46-1.55 (m, 4H), 1.59-1.61 (m, 2H), 1.74-1.77 (m, 2H), 2.19 (s, 3H), 2.30 (s, 3H), 2.42-2.44 (m, 4H), 3.29 (q, 2H), 3.38 (q, 2H), 3.60 (t, 4H), 4.77 (brs, 1H), 5.02 (brs, 1H), 5.75 (s, 1H), 6.40 (d, 1H, *J* = 5.5 Hz), 7.35 (dd, 1H, *J* = 11.0 Hz, 2.1 Hz), 7.66 (d, 1H, *J* = 8.7 Hz), 7.95 (d, 1H, *J* = 2.3 Hz), 8.51 (d, 1H, *J* = 5.5 Hz); <sup>13</sup>C NMR (100 MHz, CDCl<sub>3</sub>): 24.14, 26.62, 26.82, 28.70, 29.63, 41.05, 43.10, 43.64, 46.12, 54.67, 91.72, 98.98, 117.08, 120.96, 125.14, 128.70, 134.71, 149.07, 149.67, 151.98, 162.05, 163.21, 166.09; ESI-MS (m/z): 468.32 (M+H)<sup>+</sup>; Anal. Calcd for C<sub>25</sub>H<sub>34</sub>ClN<sub>7</sub>: C, 64.15; H, 7.32; N, 20.95; Found: C, 64.09; H, 7.31; N, 20.98; HPLC purity: 99.0 %

**N-(7-Chloro-quinolin-4-yl)-N'-[2-(4-ethyl-piperazin-1-yl)-6-methyl-pyrimidin-4-yl]-propane-1,3-diamine (8m):** White solid; Yield: 82 %; mp 184-186 °C; IR (cm<sup>-1</sup>, KBr): 3233, 2967, 2812, 1579, 1366, 1250, 1132, 998; <sup>1</sup>H NMR (400 MHz, CDCl<sub>3</sub>): 1.10 (t, 3H), 1.95 (quin, 2H), 2.24 (s, 3H), 2.40-2.44 (m, 6H), 3.43 (q, 2H), 3.55-3.59 (m, 6H), 4.94 (brs, 1H), 5.78 (s, 1H), 5.92 (brs, 1H), 6.40 (d, 1H, *J* = 5.4 Hz), 7.30 (dd, 1H, *J* = 11.0 Hz, 2.0 Hz), 7.73 (d, 1H, *J* = 8.7 Hz), 7.93 (d, 1H, *J* = 2.3 Hz), 8.49 (d, 1H, *J* = 5.4 Hz); <sup>13</sup>C NMR (100 MHz, CDCl<sub>3</sub>): 11.86, 24.38, 29.05, 38.50, 40.31, 43.64, 52.26, 52.34, 92.35, 98.85, 117.38, 121.47, 124.84, 128.53, 134.61, 149.15, 149.84, 151.94, 162.34, 163.04, 166.03; ESI-MS (m/z): 440.16 (M+H)<sup>+</sup>; Anal. Calcd for C<sub>23</sub>H<sub>30</sub>ClN<sub>7</sub>: C, 62.79; H, 6.87; N, 22.28; Found: C, 62.75; H, 6.89; N, 22.20; HPLC purity: 99.6 %

**N-(7-Chloro-quinolin-4-yl)-N'-[2-(4-ethyl-piperazin-1-yl)-6-methyl-pyrimidin-4-yl]-butane-1,4-diamine (8n):** White solid; Yield: 86 %; mp 101-103 °C; IR (cm<sup>-1</sup>, KBr): 3255, 2939, 2813, 1583, 1372, 1249, 1127, 994, 791; <sup>1</sup>H NMR (400 MHz, CDCl<sub>3</sub>): 1.09 (t, 3H), 1.73-1.80 (m, 2H), 1.84-1.91 (m, 2H), 2.19 (s, 3H), 2.38-2.43 (m, 6H), 3.35 (q, 2H), 3.48 (q, 2H), 3.57 (t, 4H), 4.83 (brs, 1H), 5.23 (brs, 1H), 5.77 (s, 1H), 6.39 (d, 1H, *J* = 5.5 Hz), 7.31 (dd, 1H, *J* = 11.0 Hz, 2.0 Hz), 7.64 (d, 1H, *J* = 8.7 Hz), 7.94 (d, 1H, *J* = 2.3 Hz), 8.51 (d, 1H, *J* = 5.5 Hz); ESI-MS (m/z): 454.35 (M+H)<sup>+</sup>; Anal. Calcd for C<sub>24</sub>H<sub>32</sub>ClN<sub>7</sub>: C, 63.49; H, 7.10; N, 21.60; Found: C, 63.59; H, 7.18; N, 21.63; HPLC purity: 99.6 %

### **Assay for *in vitro* antimalarial activity and cytotoxicity**

The antimalarial activity was determined by measuring plasmodial LDH activity as described earlier.<sup>1</sup> A suspension of red blood cells infected with D6 or W2 strain of *P. falciparum* (200



$\mu\text{L}$ , with 2% parasitemia and 2% hematocrit in RPMI 1640 medium supplemented with 10% human serum and 60  $\mu\text{g}/\text{mL}$  amikacin) was added to the wells of a 96-well plate containing 10  $\mu\text{L}$  of serially diluted test samples. The plate was flushed with a gas mixture of 90%  $\text{N}_2$ , 5%  $\text{O}_2$ , and 5%  $\text{CO}_2$  and incubated at 37  $^\circ\text{C}$ , for 72 h in a modular incubation chamber (Billups-Rothenberg, CA). Parasitic LDH activity was determined according to the procedure of Makler and Hinrichs.<sup>2</sup> Briefly, 20  $\mu\text{L}$  of the incubation mixture was mixed with 100  $\mu\text{L}$  of the Malstat<sup>TM</sup> reagent (Flow Inc., Portland, OR) and incubated at room temperature for 30 min. Twenty microliters of a 1:1 mixture of NBT/PES (Sigma, St. Louis, MO) was then added and the plate is further incubated in the dark for 1 h. The reaction was then stopped by the addition of 100  $\mu\text{L}$  of a 5% acetic acid solution. The plate was read at 650 nm. Artemisinin and chloroquine were included in each assay as antimalarial drug controls.  $\text{IC}_{50}$  values were computed from the dose response curves. To determine the selectivity index of antimalarial activity of compounds there *in vitro* cytotoxicity to mammalian cells was also determined. The assay was performed in 96-well tissue culture-treated plates as described earlier.<sup>3</sup> Vero cells (monkey kidney fibroblasts) or PK1 (pig kidney epithelial cells) or HepG2 (human hepatoma cells) were seeded to the wells of 96-well plate at a density of 25,000 cells/well and incubated for 24 h. Samples at different concentrations were added and plates were again incubated for 48 h. The number of viable cells was determined by Neutral Red assay.  $\text{IC}_{50}$  values were obtained from dose response curves. Doxorubicin was used as a positive control for cytotoxicity.

### Crystallographic Data

Single crystal X-ray diffraction intensities for compound **8f** was collected on an Oxford CCD diffractometer having Xcalibur, sapphire diffraction measurement device at 293 K, using graphite-monochromated Mo-K $\alpha$  radiation ( $\lambda = 0.71073 \text{ \AA}$ ).<sup>4</sup> The multi-scan absorption correction was applied using CrysAlisPRO. The crystal structures were solved by the direct methods using SIR-92 and refined by full-matrix least-squares refinement techniques on  $F^2$  using SHELXL97. Hydrogen atoms were placed into the calculated positions and included in the last cycles of the refinement. All calculations were done using WinGX software.<sup>5</sup> CCDC 838496 contains the supplementary crystallographic data for compound **8f**. These data can be obtained free of charge from The Cambridge Crystallographic Data Centre via [www.ccdc.cam.ac.uk/data\\_request/cif](http://www.ccdc.cam.ac.uk/data_request/cif).

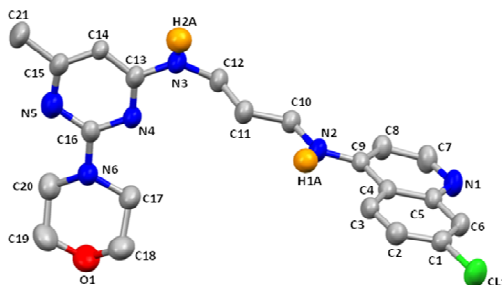

Figure 2: Crystal structure of compound **8f** with partial numbering scheme. Thermal ellipsoidal are drawn at 40% probability level. Hydrogen atoms attached only to nitrogen atoms are shown for more clarity. Selected bond lengths [Å]: C9-N2 1.344(3), C10-N2 1.452(4), C12-N3 1.449(4), C13-N3 1.351(4), C16-N4 1.340(4), C16-N6 1.379(4), C16-N5 1.403(4); Selected bond angles [deg]: N4-C16-N6 116.2(3), N6-C16-N5 122.5(3), C9-N2-C10 121.9(2), C13-N3-C12 124.1(3).

|                                                                | <b>Compound 8f</b>                                                                       |
|----------------------------------------------------------------|------------------------------------------------------------------------------------------|
| <b>Molecular formula</b>                                       | C <sub>21</sub> H <sub>25</sub> ClN <sub>6</sub> O (CHCl <sub>3</sub> .H <sub>2</sub> O) |
| <b>Formula Weight</b>                                          | 546.27                                                                                   |
| <b>Temperature (K)</b>                                         | 298(2)                                                                                   |
| <b>Crystal system</b>                                          | triclinic                                                                                |
| <b>Space group</b>                                             | P -1                                                                                     |
| <b>a (Å)</b>                                                   | 9.1519(5)                                                                                |
| <b>b (Å)</b>                                                   | 9.4906(4)                                                                                |
| <b>c (Å)</b>                                                   | 16.1562(8)                                                                               |
| <b>α [°]</b>                                                   | 74.799(4)                                                                                |
| <b>β [°]</b>                                                   | 75.567(5)                                                                                |
| <b>γ [°]</b>                                                   | 78.317(4)                                                                                |
| <b>V (Å<sup>3</sup>)</b>                                       | 1297.25(11)                                                                              |
| <b>Z</b>                                                       | 2                                                                                        |
| <b>d (g cm<sup>-3</sup>)</b>                                   | 1.399                                                                                    |
| <b>F(000)</b>                                                  | 564                                                                                      |
| <b>Goodness of fit (F<sup>2</sup>)</b>                         | 1.031                                                                                    |
| <b>R<sub>1</sub>, wR<sub>2</sub>[I &gt; 2 (I)]<sup>a</sup></b> | R <sub>1</sub> = 0.0686,<br>wR <sub>2</sub> = 0.2009                                     |
| <b>R<sub>1</sub>, wR<sub>2</sub>[ all data]<sup>b</sup></b>    | R <sub>1</sub> = 0.0816,<br>wR <sub>2</sub> = 0.2174                                     |

$$^a R = \frac{\sum(|F_o| - |F_c|)}{\sum F_o}$$

$$^b R_w = \left\{ \frac{\sum [w(F_o^2 - F_c^2)^2]}{\sum [w(F_o^2)^2]} \right\}^{1/2}$$

## References

1. M. Jain, S. I. Khan, B. L. Tekwani, M. R. Jacob, S. Singh, P. P. Singh and R. Jain, *Bioorg. Med. Chem.*, 2005, **13**, 4458-4466.
2. M. T. Makler and D. J. Hinrichs, *Am. J. Trop. Med. Hyg.*, 1993, **48**, 205-210.
3. J. Mustafa, S. I. Khan, G. Ma, L. A. Walker and I. A. Khan, *Lipids*, 2004, **39**, 167-172.
4. *CrysAlisPro*, Oxford Diffraction Ltd., version 1.171.33.49b, 2009.
5. L. J. Farrugia, *WinGX*, version 1.64, *An Integrated System of Windows Programs for the Solution, Refinement and Analysis of Single-Crystal X-ray Diffraction Data*, Department of Chemistry, University of Glasgow, 2003.

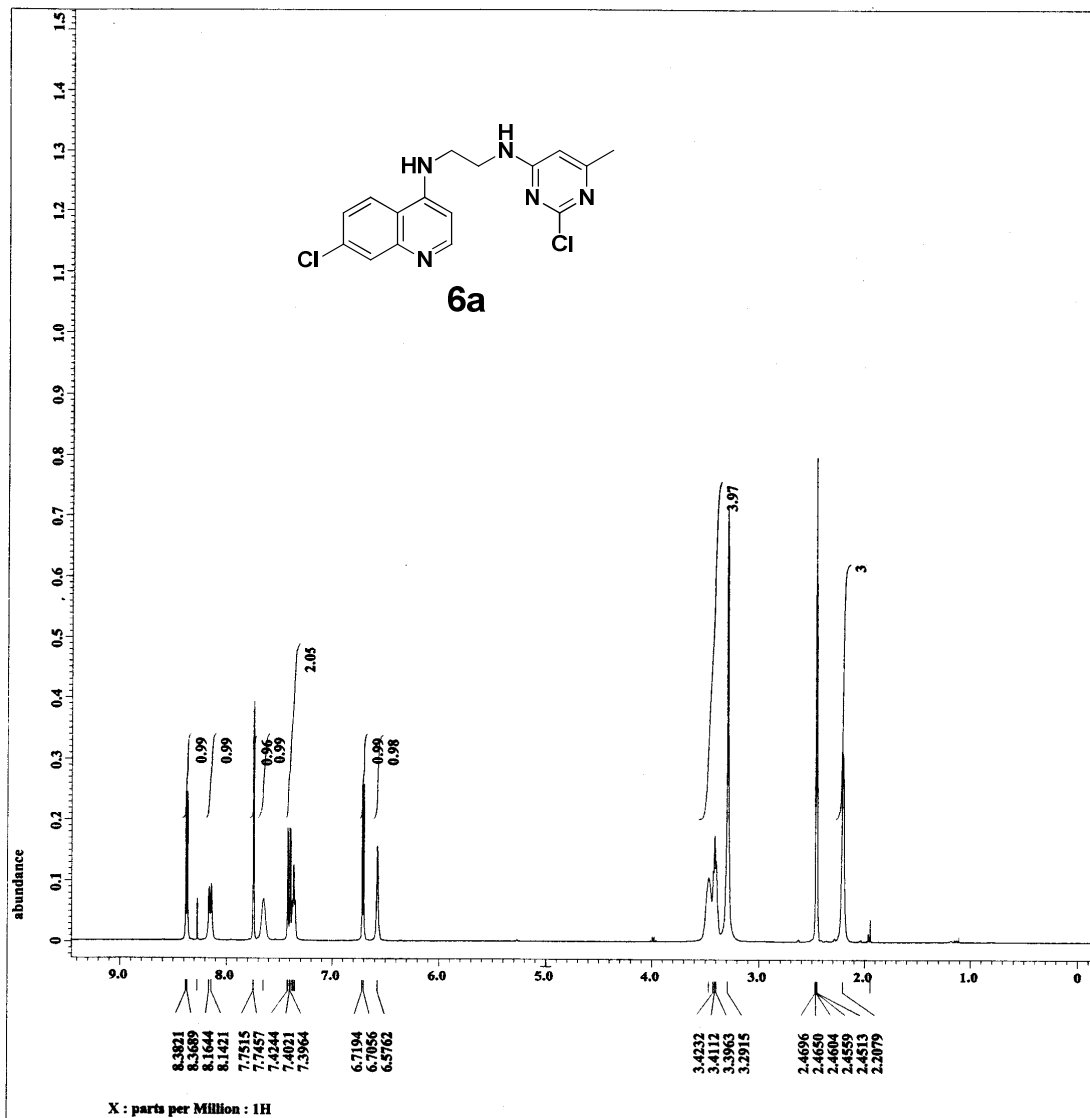

# JEOL

Filename = RK 58A-3.jdf  
 Author = delta  
 Experiment = single pulse.ex2  
 Sample id = RK 58A  
 Solvent = DMSO-D6  
 Creation time = 25-MAY-2010 19:15:16  
 Revision time = 25-MAY-2010 16:58:22  
 Current time = 25-MAY-2010 17:00:10

Comment = RK 58A  
 Data format = 1D COMPLEX  
 Dir file = 26214  
 Dir title = 1H  
 Dir units = [ppm]  
 Dimensions = X  
 Site = BCX 400P  
 Spectrometer = DELTA2\_MMR

Field strength = 9.389766 [T] (400 [MHz])  
 X\_acq\_duration = 4.36731904 [s]  
 X\_domain = 1H  
 X\_freq = 399.78219838 [MHz]  
 X\_offset = 5 [ppm]  
 X\_points = 32768  
 X\_prescans = 1  
 X\_resolution = 0.22897343 [Hz]  
 X\_sweep = 7.5030012 [kHz]  
 IRR\_domain = 1H  
 IRR\_freq = 399.78219838 [MHz]  
 IRR\_offset = 5 [ppm]  
 Tri\_domain = 1H  
 Tri\_freq = 399.78219838 [MHz]  
 Tri\_offset = 5 [ppm]  
 Clipped = FALSE  
 Mod\_return = 1  
 Scans = 16  
 Total\_scans = 16  
 X\_90\_width = 11.5 [us]  
 X\_acq\_time = 4.36731904 [s]  
 X\_angle = 45 [deg]  
 X\_atn = 0.99 [dB]  
 X\_pulse = 5.75 [us]  
 IRR\_mode = Off  
 Tri\_mode = Off  
 Dante\_preset = FALSE  
 Initial\_wait = 1 [s]  
 Recvr\_gain = 40  
 Relaxation\_delay = 5 [s]  
 Repetition\_time = 9.36731904 [s]  
 Temp\_get = 24.1 [dC]

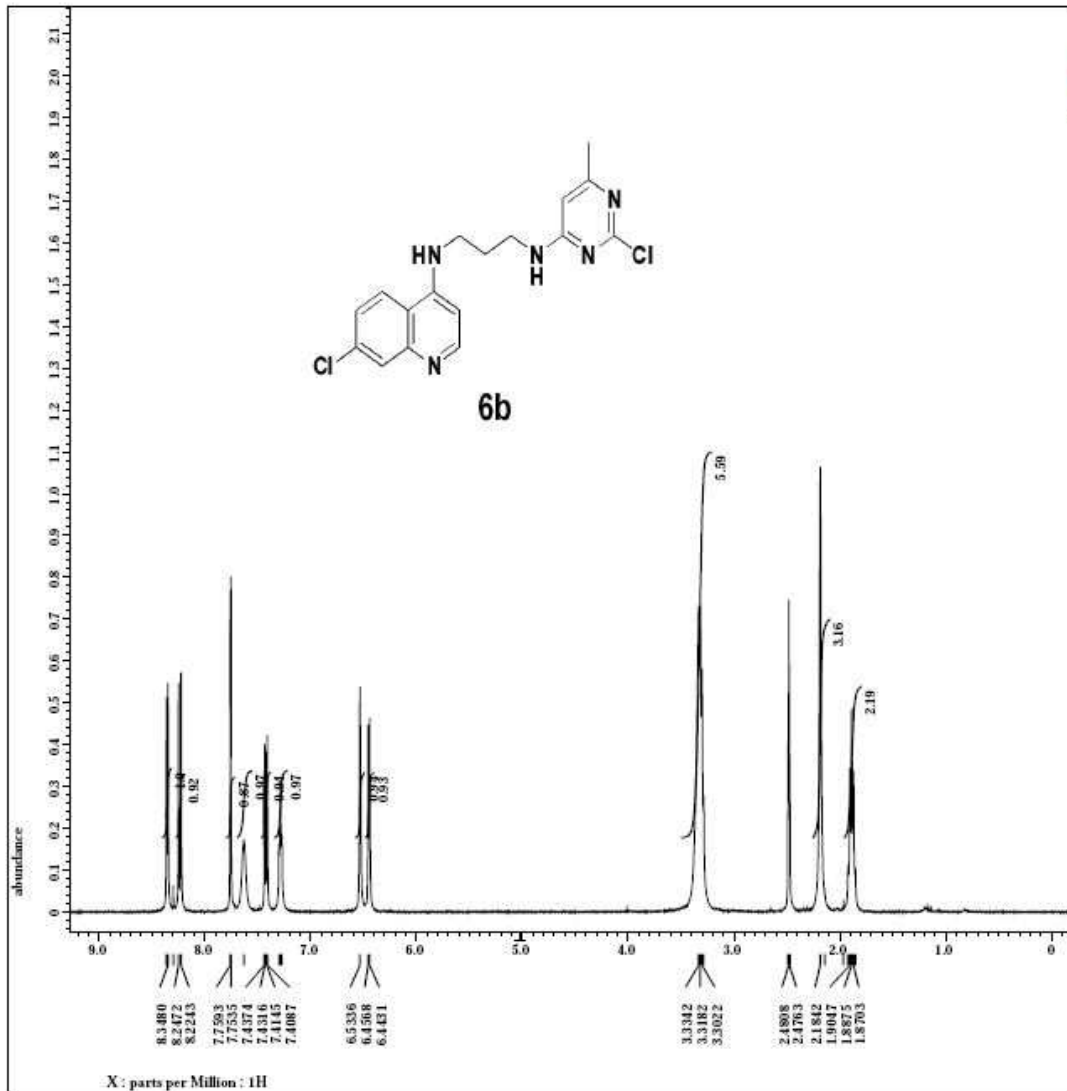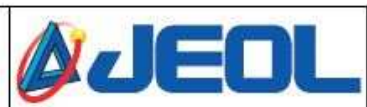

Filename - DSE\_SM-484A\_PROTON-5.  
 Author - delta  
 Experiment - single\_pulseq.ex2  
 Sample\_id - DSE\_SM-484A  
 Solvent - DMSO-D6  
 Creation\_time - 3-JUN-2010 16:00:12  
 Revision\_time - 3-JUN-2010 16:08:22  
 Current\_time - 3-JUN-2010 16:08:54

Comment - DSE\_SM-484A  
 Data\_format - 1D\_COMPLEX  
 Dia\_size - 13107  
 Dia\_title - 1H  
 Dia\_units - [ppm]  
 Dimensions - 2  
 Site - ECI 400P  
 Spectrometer - DELTA2\_NMR

Field\_strength - 9.389766 [T] (400 [MHz])  
 X\_acq\_duration - 2.18365952 [s]  
 X\_domain - 1H  
 X\_freq - 399.78219838 [MHz]  
 X\_offset - 5 [ppm]  
 X\_points - 16394  
 X\_prescans - 1  
 X\_resolution - 0.45744685 [Hz]  
 X\_sweep - 7.5030012 [kHz]  
 Irr\_domain - 1H  
 Irr\_freq - 399.78219838 [MHz]  
 Irr\_offset - 5 [ppm]  
 Tri\_domain - 1H  
 Tri\_freq - 399.78219838 [MHz]  
 Tri\_offset - 5 [ppm]  
 Clipped - FALSE  
 Mod\_return - 1  
 Scans - 16  
 Total\_scans - 16

X\_90\_width - 11.5 [us]  
 X\_acq\_time - 2.18365952 [s]  
 X\_angle - 45 [deg]  
 X\_atn - 0.99 [dB]  
 X\_pulse - 5.75 [us]  
 Irr\_mode - Off  
 Tri\_mode - Off  
 Dantol\_present - FALSE  
 Initial\_wait - 1 [s]  
 Recvr\_gain - 36  
 Relaxation\_delay - 4 [s]  
 Repetition\_time - 6.18365952 [s]  
 Temp\_get - 22.3 [dC]

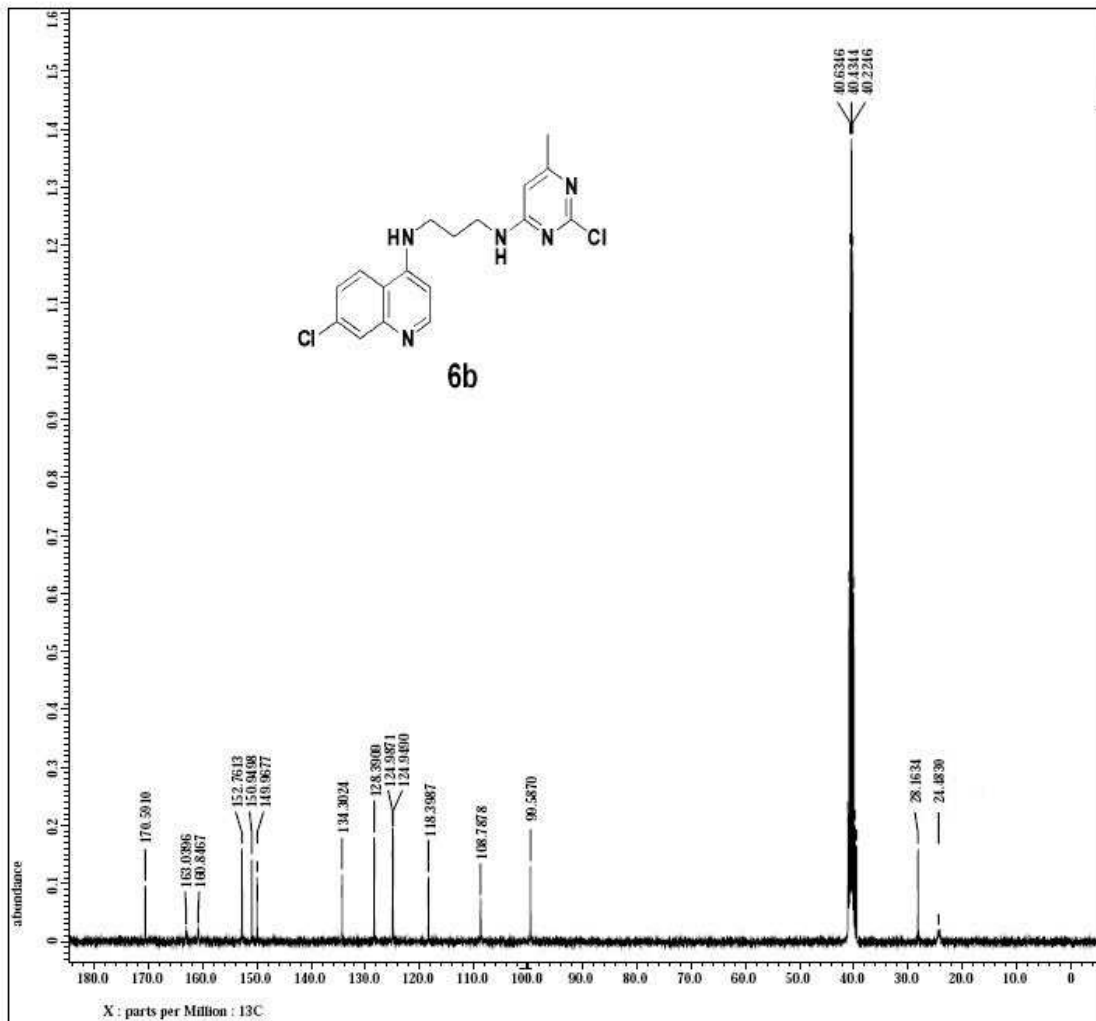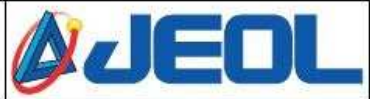

```

Filename      - DSR_SM-484A_CARBON-5.
Author        - delta
Experiment    - single_pulse_dec
Sample_id     - DSR_SM-484A
Solvent       - DMSO-D6
Creation_time - 24-NOV-2010 07:28:25
Revision_time - 29-NOV-2010 21:34:24
Current_time  - 29-NOV-2010 21:35:32

Comment      - DSR SM-484A
Data_format  - 1D_COMPLEX
Dim_1_name   - 32214
Dim_1_title  - 13c
Dim_1_units  - [ppm]
Dimensions   - X
Site         - ECI 400P
Spectrometer - DELTA2_NMR

Field_strength - 9.389766 [T] (400 [MHz])
X_acq_duration - 1.04333312 [s]
X_domain      - 13c
X_freq       - 100.52530333 [MHz]
X_offset     - 100 [ppm]
X_points     - 32768
X_pre scans  - 4
X_resolution - 0.95846665 [Hz]
X_sweep      - 31.40703518 [kHz]
Irr_domain   - 1H
Irr_freq     - 399.78219838 [MHz]
Irr_offset   - 5 [ppm]
Clipped     - FALSE
Mod_return   - 1
Scans       - 750
Total_scans - 750

X_90_width   - 11.75 [us]
X_acq_time   - 1.04333312 [s]
X_angle      - 30 [deg]
X_atn        - 10 [dB]
X_pulse     - 3.91566667 [us]
Irr_atn_dec - 24.95 [dB]
Irr_atn_noc - 24.95 [dB]
Irr_pulse   - WALTZ
Decoupling  - TRUE
Initial_wait - 1 [s]
Noc         - TRUE
Noc_time    - 2 [s]
Recvr_gain  - 60
Relaxation_delay - 2 [s]
Repetition_time - 3.04333312 [s]
Temp_get    - 21.6 [dc]

```

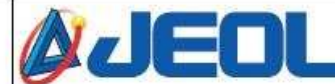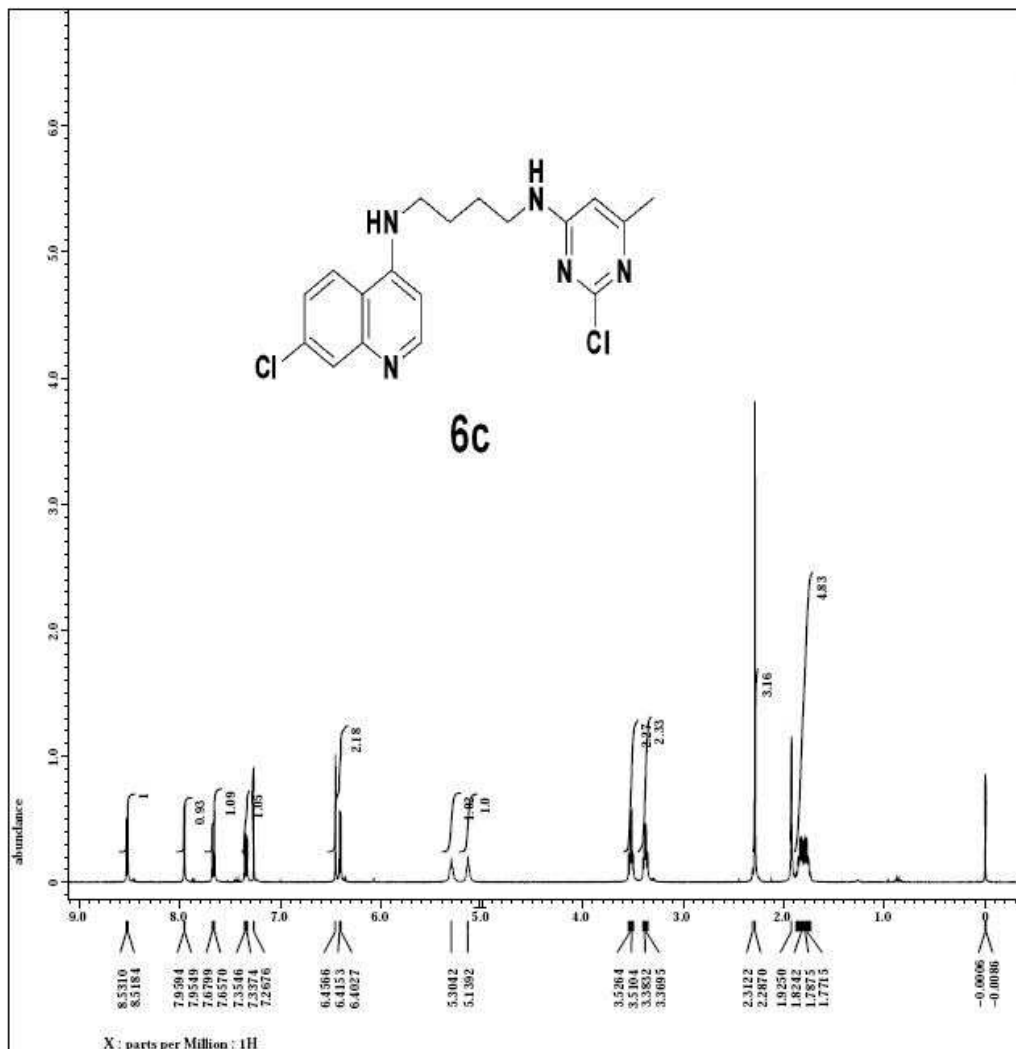

|                  |                            |
|------------------|----------------------------|
| Filename         | - DSR_SM-498A_PROTON-5.    |
| Author           | - ds12                     |
| Experiment       | - single_pulse.ex2         |
| Sample_id        | - DSR_SM-498A              |
| Solvent          | - CHLOROFORM-D             |
| Creation_time    | - 15-JUN-2010 15:02:51     |
| Revision_time    | - 15-JUN-2010 15:26:15     |
| Current_time     | - 15-JUN-2010 15:26:30     |
| Comment          | - DSR_SM-498A              |
| Data_format      | - 1D COMPLEX               |
| Dir_size         | - 13107                    |
| Dir_title        | - 1H                       |
| Dir_units        | - [ppm]                    |
| Dimensions       | - X                        |
| Site             | - BCX 400P                 |
| Spectrometer     | - DELTA2_MMR               |
| Field_strength   | - 9.389766 [T] (400 [MHz]) |
| X_acq_duration   | - 2.18365952 [s]           |
| X_domain         | - 1H                       |
| X_freq           | - 399.78219838 [MHz]       |
| X_offset         | - 5 [ppm]                  |
| X_points         | - 16384                    |
| X_procscans      | - 1                        |
| X_resolution     | - 0.45794695 [Hz]          |
| X_sweep          | - 7.5030012 [kHz]          |
| irf_domain       | - 1H                       |
| irf_freq         | - 399.78219838 [MHz]       |
| irf_offset       | - 5 [ppm]                  |
| Tri_domain       | - 1H                       |
| Tri_freq         | - 399.78219838 [MHz]       |
| Tri_offset       | - 5 [ppm]                  |
| Clipped          | - FALSE                    |
| Mod_return       | - 1                        |
| Scans            | - 16                       |
| Total_scans      | - 16                       |
| X_90_width       | - 11.5 [us]                |
| X_acq_time       | - 2.18365952 [s]           |
| X_angle          | - 45 [deg]                 |
| X_atn            | - 0.39 [dB]                |
| X_pulse          | - 5.75 [us]                |
| irf_mode         | - Off                      |
| Tri_mode         | - Off                      |
| Dante_presat     | - FALSE                    |
| Initial_wait     | - 1 [s]                    |
| Recvr_gain       | - 40                       |
| Relaxation_delay | - 4 [s]                    |
| Repetition_time  | - 6.18365952 [s]           |
| Temp_get         | - 23.6 [dC]                |

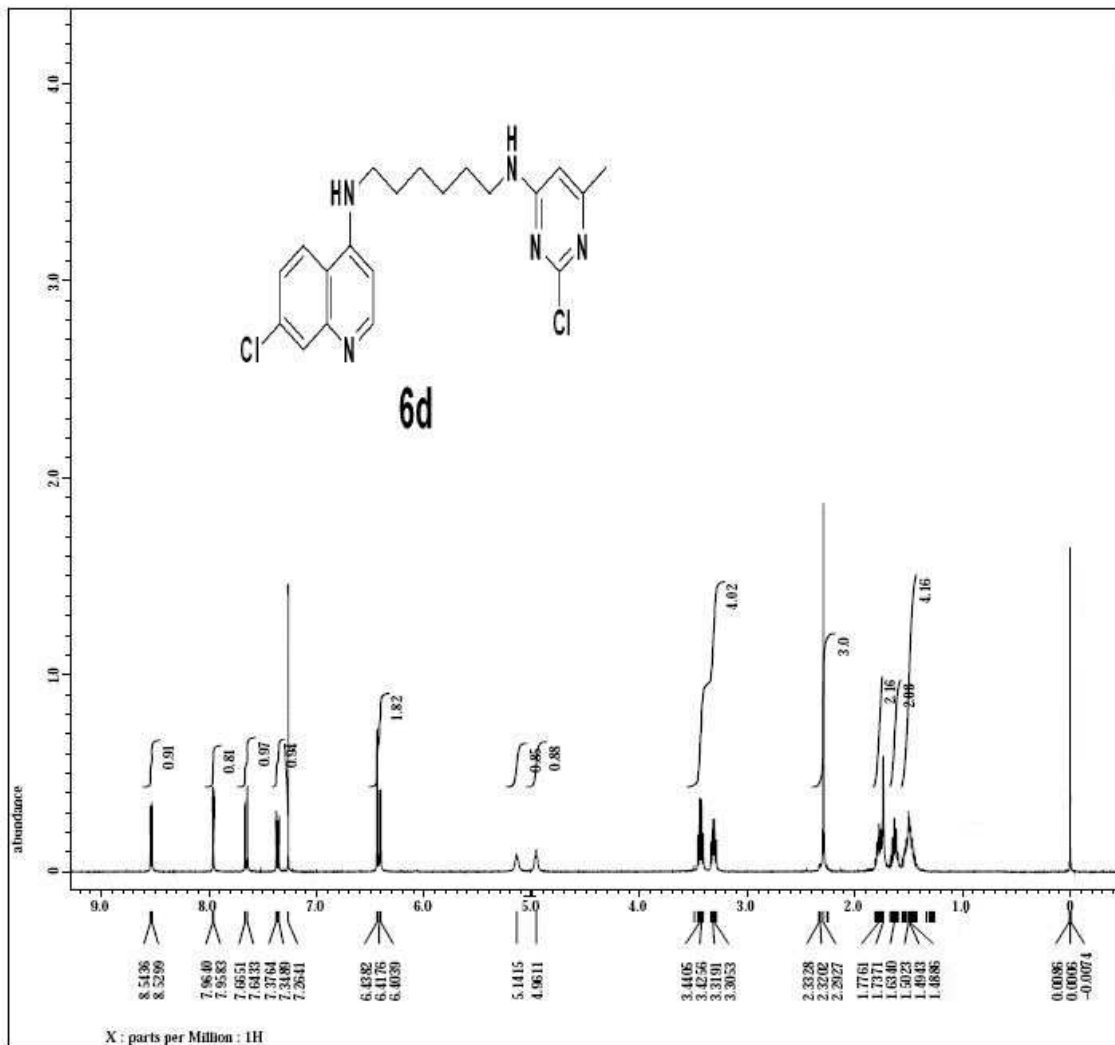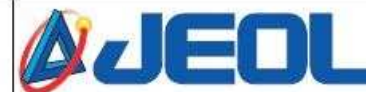

Filename - DSR\_SM-504A\_PROTON-6.  
 Author - delta  
 Experiment - single\_pulse.ex2  
 Sample\_id - DSR\_SM-504A  
 Solvent - CHLOROFORM-D  
 Creation\_time - 22-JUN-2010 13:43:45  
 Revision\_time - 28-JUN-2010 10:49:55  
 Current\_time - 28-JUN-2010 10:50:16  
 Comment - DSR\_SM-504A  
 Data\_format - 1D\_COMPLEX  
 Dim\_size - 13107  
 Dim\_title - 1H  
 Dim\_units - [ppm]  
 Dimensions - X  
 Site - BCK 400P  
 Spectrometer - DELTA2\_NMR  
 Field\_strength - 9.399766 [T] (400 [MHz])  
 F1\_acq\_duration - 2.18365952 [s]  
 F1\_domain - 1H  
 F1\_freq - 399.78219838 [MHz]  
 F1\_offset - 5 [ppm]  
 F1\_points - 16384  
 F1\_program - 1  
 F1\_resolution - 0.45794685 [Hz]  
 F1\_sweep - 7.5030012 [kHz]  
 F1r\_domain - 1H  
 F1r\_freq - 399.78219838 [MHz]  
 F1r\_offset - 5 [ppm]  
 F1r\_domain - 1H  
 F1r\_freq - 399.78219838 [MHz]  
 F1r\_offset - 5 [ppm]  
 clipped - FALSE  
 Mod\_return - 1  
 Scans - 16  
 Total\_scans - 16  
 X\_90\_width - 11.5 [us]  
 X\_acq\_time - 2.18365952 [s]  
 X\_angle - 45 [deg]  
 X\_atn - 0.99 [dB]  
 X\_pulse - 5.75 [us]  
 ITR\_mode - Off  
 Tri\_mode - Off  
 Dants\_preat - FALSE  
 Initial\_wait - 1 [s]  
 Recvr\_gain - 40  
 Relaxation\_delay - 4 [s]  
 Repetition\_time - 6.18365952 [s]  
 Temp\_get - 23.7 [dc]



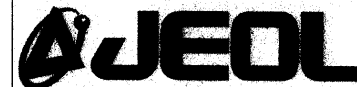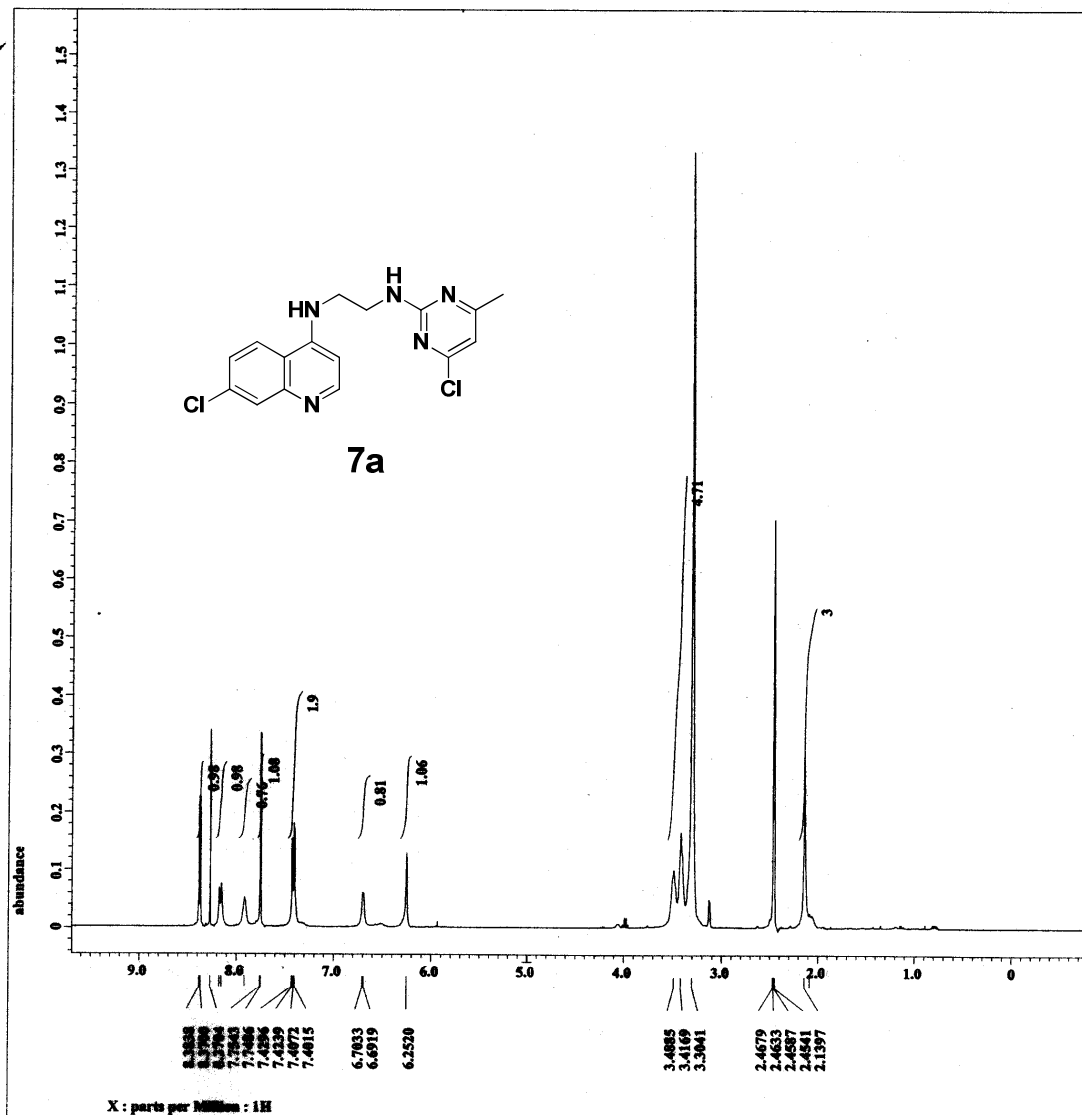

Filename = EK 588-3.jdf  
Author = delta  
Experiment = single\_pulse.ez2  
Sample\_id = EK 588  
Solvent = DMSO-D6  
Creation time = 25-MAY-2010 19:23:52  
Revision time = 25-MAY-2010 17:09:46  
Current time = 25-MAY-2010 17:09:54

Comment = EK 588  
Data format = 1D COMPLEX  
Dim\_size = 26214  
Dim\_title = 1H  
Dim\_units = [ppm]  
Dimensions = 1  
Site = KCX 400P  
Spectrometer = DELTA2\_MMR

Field\_strength = 9.389766 [T] (400 [MHz])  
X\_acq\_duration = 4.36731904 [s]  
X\_domain = 1H  
X\_freq = 399.78219838 [MHz]  
X\_offset = 5 [ppm]  
X\_points = 32768  
X\_prescan = 1  
X\_resolution = 0.22897343 [Hz]  
X\_sweep = 7.5030012 [kHz]  
Xr\_domain = 1H  
Xr\_freq = 399.78219838 [MHz]  
Xr\_offset = 5 [ppm]  
Xr\_domain = 1H  
Xr\_freq = 399.78219838 [MHz]  
Xr\_offset = 5 [ppm]  
Clipped = FALSE  
Mod\_return = 1  
Scans = 16  
Total\_scans = 16  
X\_90\_width = 11.5 [us]  
X\_acq\_time = 4.36731904 [s]  
X\_angle = 45 [deg]  
X\_atn = 0.99 [dB]  
X\_pulse = 5.75 [us]  
Xr\_mode = Off  
Xr\_mode = Off  
Datab\_preset = FALSE  
Initial\_wait = 1 [s]  
Recvr\_gain = 40  
Relaxation\_delay = 5 [s]  
Repetition\_time = 4.36731904 [s]  
Temp\_get = 24.4 [dC]

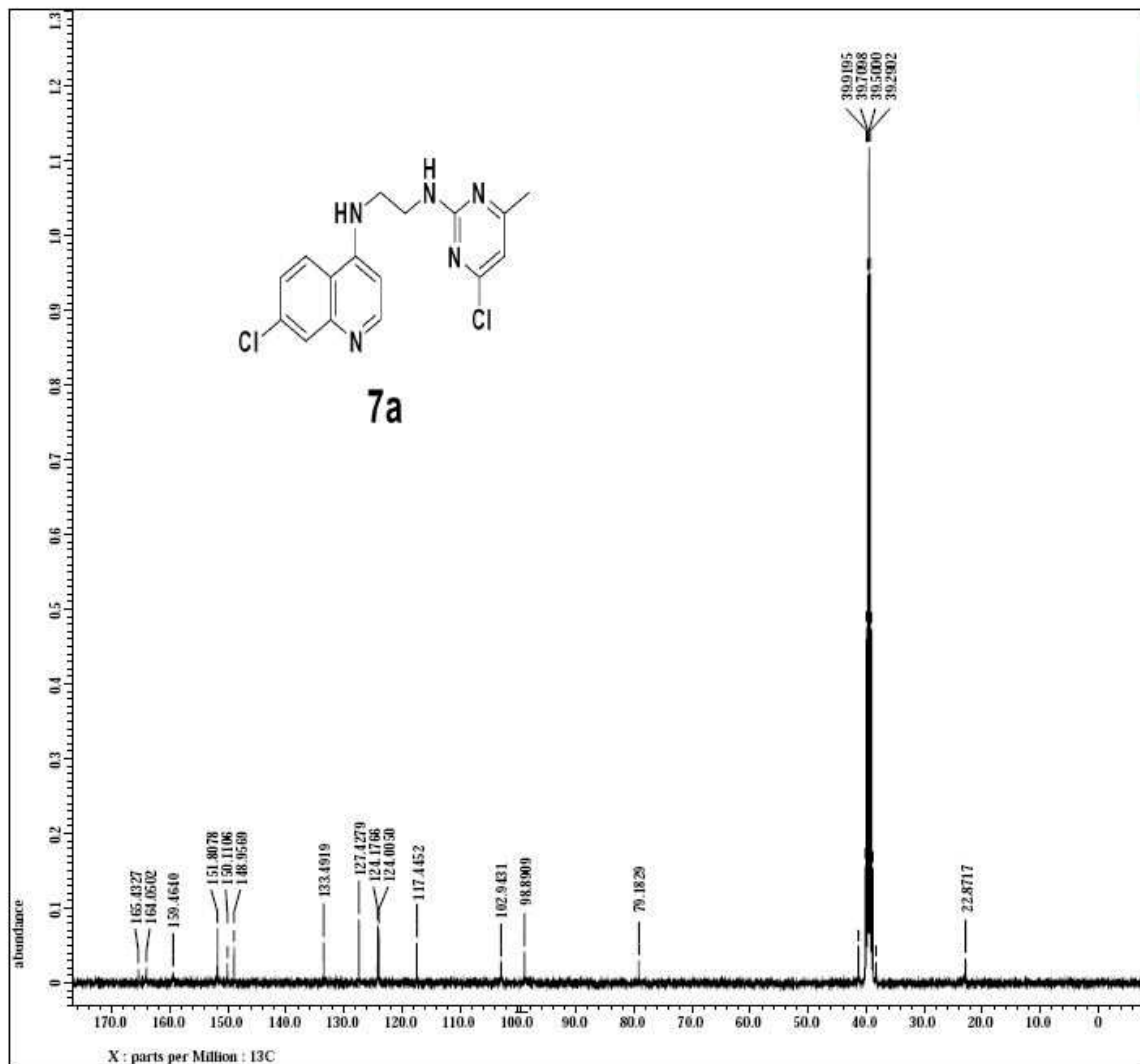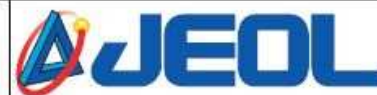

```

Filename      - DSR_SM-488B_CARBON-5.
Author        - delts
Experiment    - single_pulse_dec
Sample_id     - DSR_SM-488B
Solvent       - DMSO-D6
Creation_time - 27-NOV-2010 05:21:38
Revision_time - 1-DEC-2010 22:15:19
Current_time  - 1-DEC-2010 22:26:32

Comment       - DSR SM-488B
Data_format   - 1D COMPLEX
Dim_size      - 26214
Dim_title     - 13c
Dim_units     - [ppm]
Dimensions    - 2
Site          - ECI 400P
Spectrometer  - DELTA2_NMR

Field_strength - 9.399766 [T] (400 [MHz])
X_acq_duration - 1.04333312 [s]
X_domain      - 13c
X_freq        - 100.52530333 [MHz]
X_offset      - 100 [ppm]
X_points      - 32768
X_prescans    - 4
X_resolution  - 0.95846665 [Hz]
X_sweep       - 31.40703518 [kHz]
Irr_domain    - 1H
Irr_freq      - 399.78219838 [MHz]
Irr_offset    - 5 [ppm]
Clipped       - FALSE
Mod_return    - 1
Scans         - 750
Total_scans   - 750

X_90_width    - 11.75 [us]
X_acq_time    - 1.04333312 [s]
X_angle       - 30 [deg]
X_atn         - 10 [dB]
X_pulse       - 3.91666667 [us]
Irr_atn_dec   - 24.95 [dB]
Irr_atn_noc   - 24.95 [dB]
Irr_noise     - WALTZ
Decoupling    - TRFB
Initial_wait  - 1 [s]
Noe           - TRFB
Noe_time      - 2 [s]
Recvr_gain    - 50
Relaxation_delay - 2 [s]
Repetition_time - 3.04333312 [s]
Temp_get      - 22.2 [dc]

```

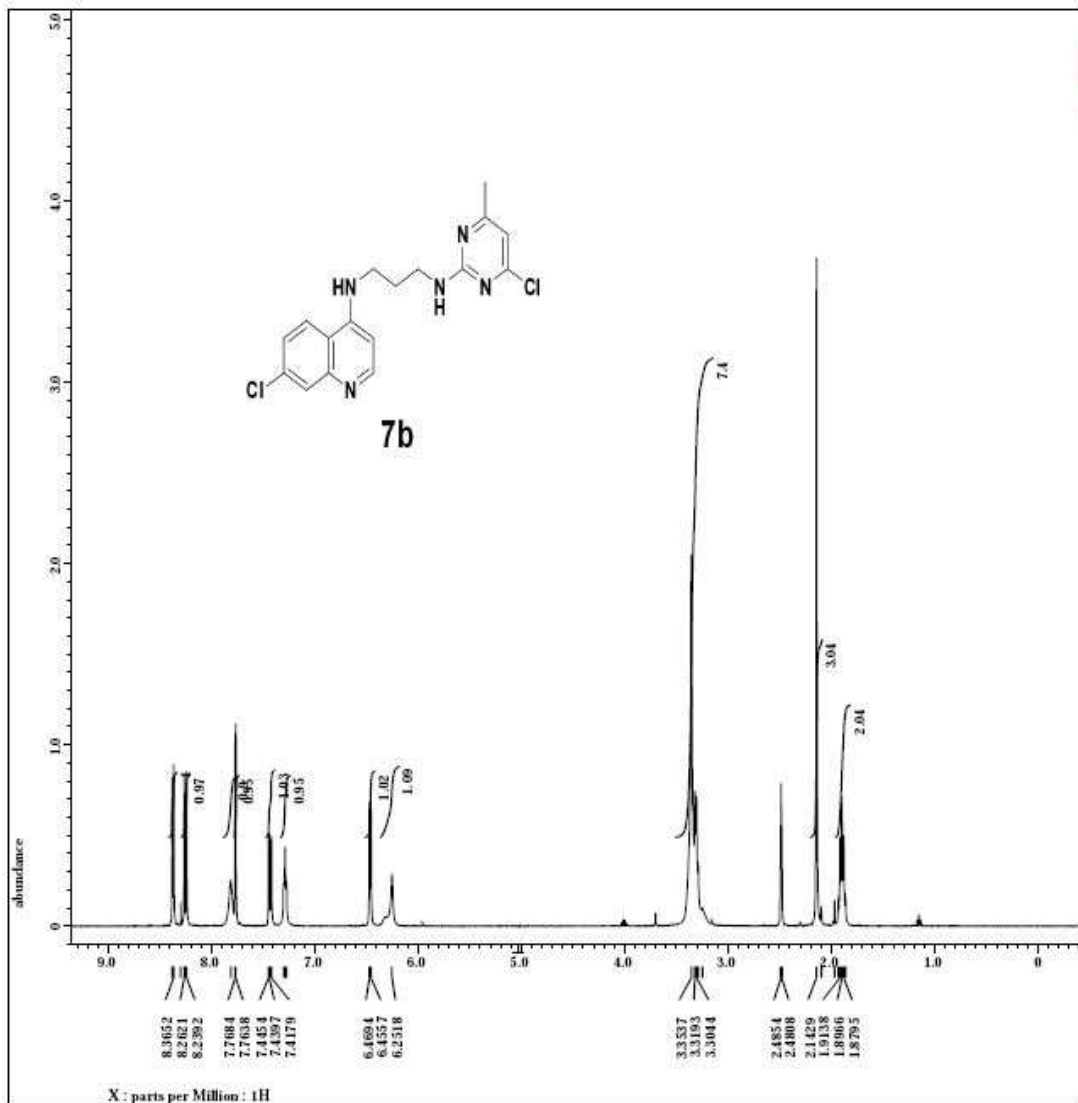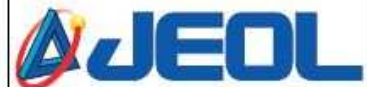

```

Filename      = EK_54B_PROTON-5.jdr
Author       = deIta
Experiment   = single_pulse.ex2
Sample_id    = EK_54B
Solvent      = DMSO-D6
Creation_time = 3-JUN-2010 17:06:23
Revision_time = 3-JUN-2010 16:38:15
Current_time  = 3-JUN-2010 16:38:33

Comment      = EK_54B
Data_format  = 1D_COMPLEX
Dir_size     = 13107
Dir_title    = 1H
Dir_units    = [ppm]
Dimensions   = 2
Site         = BCI_400P
Spectrometer = DELTA2_NMR

Field_strength = 9.389766 [T] (400 [MHz])
X_acq_duration = 2.18365952 [s]
X_domain       = 1H
X_freq         = 399.78219838 [MHz]
X_offset       = 5 [ppm]
X_points       = 16384
X_prescans     = 1
X_resolution   = 0.45794685 [Hz]
X_sweep        = 7.5030012 [kHz]
Tri_domain     = 1H
Tri_freq       = 399.78219838 [MHz]
Tri_offset     = 5 [ppm]
Tri_domain     = 1H
Tri_freq       = 399.78219838 [MHz]
Tri_offset     = 5 [ppm]
Clipped       = FALSE
Mod_return    = 1
Scans         = 16
Total_scans   = 16

X_90_width    = 11.5 [us]
X_acq_time    = 2.18365952 [s]
X_angle       = 45 [deg]
X_atn         = 0.99 [dB]
X_pulse       = 5.75 [us]
Irr_mode      = off
Tri_mode      = off
Dante_preset  = FALSE
Initial_wait  = 1 [s]
Socvr_gain    = 36
Relaxation_delay = 4 [s]
Repetition_time = 6.18365952 [s]
Temp_get      = 24 [dC]
  
```

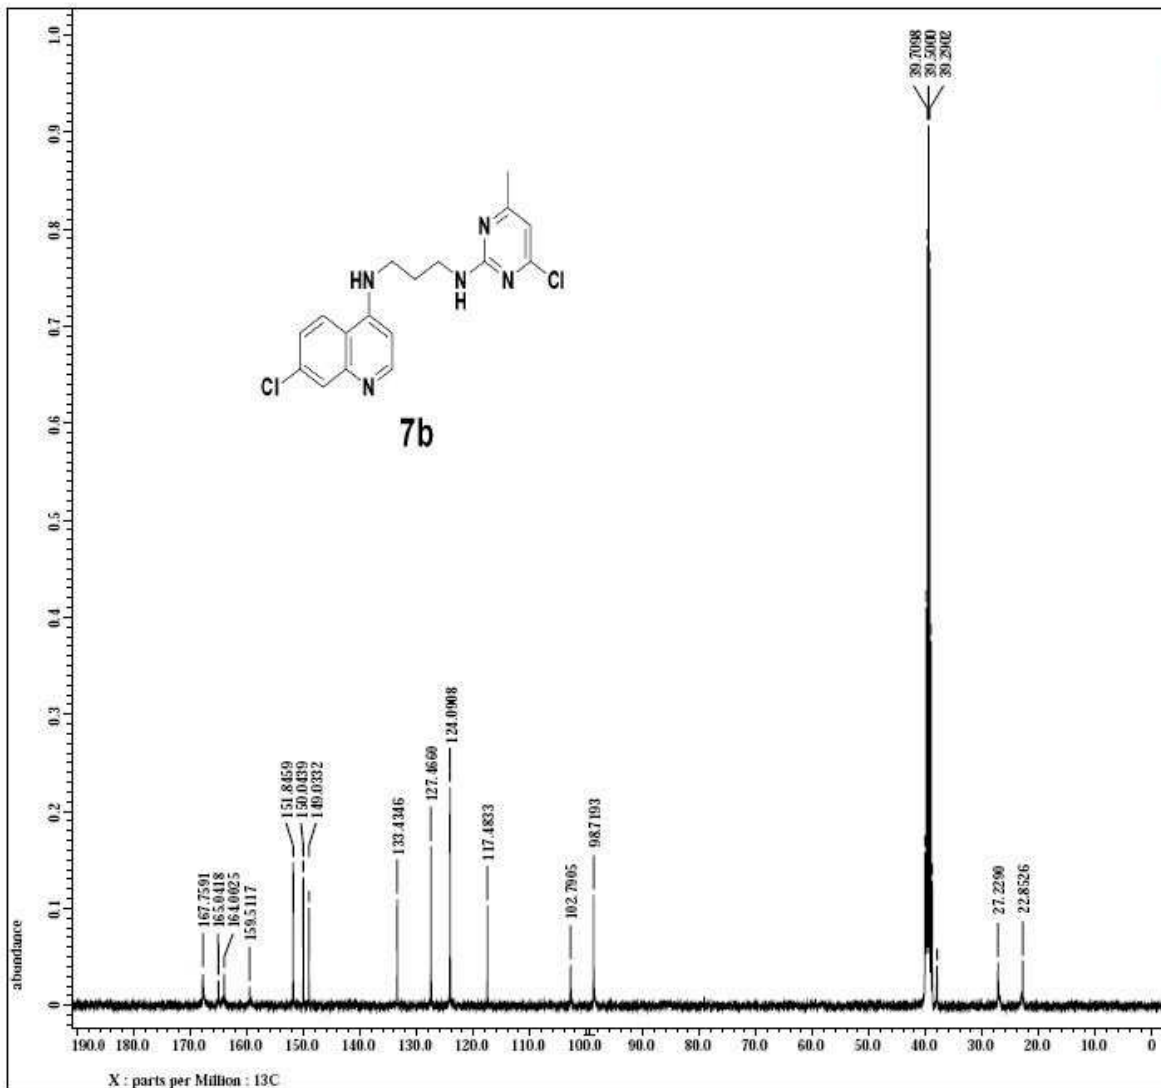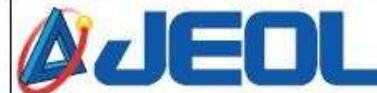

Filename - DSR\_SM-484B\_CARBON-5.  
 Author - delta  
 Experiment - single\_pulse\_dec  
 Sample\_id - DSR\_SM-484B  
 Solvent - DMSO-D6  
 Creation\_time - 24-NOV-2010 08:13:08  
 Revision\_time - 29-NOV-2010 21:46:44  
 Current\_time - 29-NOV-2010 21:48:08

Comment - DSR\_SM-484B  
 Data\_format - 1D\_COMPLEX  
 Dim\_size - 25214  
 Dim\_title - 13C  
 Dim\_units - [ppm]  
 Dimensions - X  
 Site - ECX 400P  
 Spectrometer - DELTA2\_NMR

Field\_strength - 9.399766 [T] (400 [MHz])  
 X\_acq\_duration - 1.04333312 [s]  
 Dim\_size - 13C  
 X\_freq - 100.52530333 [MHz]  
 X\_offset - 100 [ppm]  
 X\_points - 32768  
 X\_prescans - 4  
 X\_resolution - 0.95946665 [Hz]  
 X\_sweep - 31.40703518 [kHz]  
 Irr\_domain - 1H  
 Irr\_freq - 399.78219838 [MHz]  
 Irr\_offset - 5 [ppm]  
 Clipped - FALSE  
 Mod\_return - 1  
 Scans - 750  
 Total\_scans - 750

X\_90\_width - 11.75 [us]  
 X\_acq\_time - 1.04333312 [s]  
 X\_angle - 30 [deg]  
 X\_atn - 10 [dB]  
 X\_pulse - 3.91656667 [us]  
 Irr\_atn\_dec - 24.95 [dB]  
 Irr\_atn\_noc - 24.95 [dB]  
 Irr\_noise - WALTZ  
 Decoupling - TRUE  
 Initial\_wait - 1 [s]  
 Noe - TRUE  
 Noe\_time - 2 [s]  
 Recvr\_gain - 55  
 Relaxation\_delay - 2 [s]  
 Repetition\_time - 3.04333312 [s]  
 Temp\_get - 21.5 [dc]

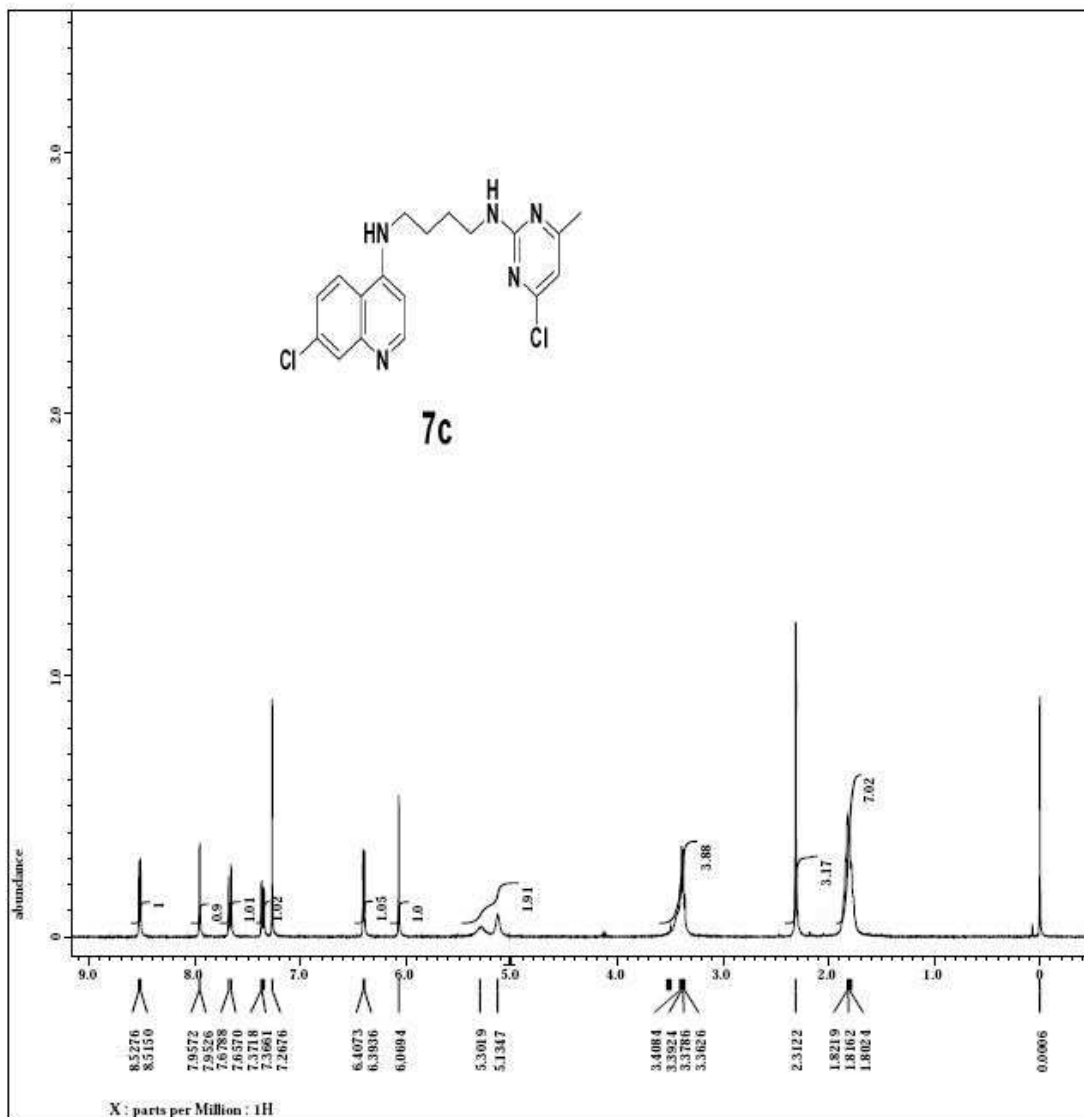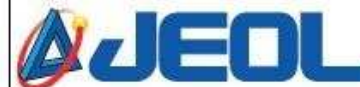

Filename - DER\_SM-448B\_PROTON-5  
 Author - delia  
 Experiment - single\_pulse\_ex2  
 Sample id - DER\_SM-448B  
 Solvent - CHLOROFORM-D  
 Creation time - 16-JUN-2010 13:25:50  
 Revision time - 16-JUN-2010 15:34:06  
 Current time - 16-JUN-2010 15:34:49

Comment - DER\_SM-448B  
 Data format - 1D\_COMPLEX  
 Dia\_size - 13107  
 Dia\_title - 1H  
 Dia\_units - [ppm]  
 Dimensions - X  
 Site - BCX 400P  
 Spectrometer - DELTA2\_NMR

Field\_strength - 9.389766 [T] (400 [MHz])  
 K\_acq\_duration - 2.18365952 [s]  
 K\_domain - 1H  
 K\_freq - 399.78219838 [MHz]  
 K\_offset - 5 [ppm]  
 K\_points - 16384  
 K\_preprocs - 1  
 K\_resolution - 0.45784685 [Hz]  
 K\_sweep - 7.5030012 [kHz]  
 Iir\_domain - 1H  
 Iir\_freq - 399.78219838 [MHz]  
 Iir\_offset - 5 [ppm]  
 Tri\_domain - 1H  
 Tri\_freq - 399.78219838 [MHz]  
 Tri\_offset - 5 [ppm]  
 Clipped - FALSE  
 Mod\_return - 1  
 Scans - 16  
 Total\_scans - 16

K\_90\_width - 11.5 [us]  
 K\_acq\_time - 2.18365952 [s]  
 K\_angle - 45 [deg]  
 K\_atn - 0.39 [dB]  
 K\_pulse - 5.75 [us]  
 Iir\_mode - Off  
 Tri\_mode - Off  
 Dante\_preseq - FALSE  
 Initial\_wait - 1 [s]  
 Recvr\_gain - 42  
 Relaxation\_delay - 4 [s]  
 Repetition\_time - 6.18365952 [s]  
 Temp\_get - 21.7 [dC]

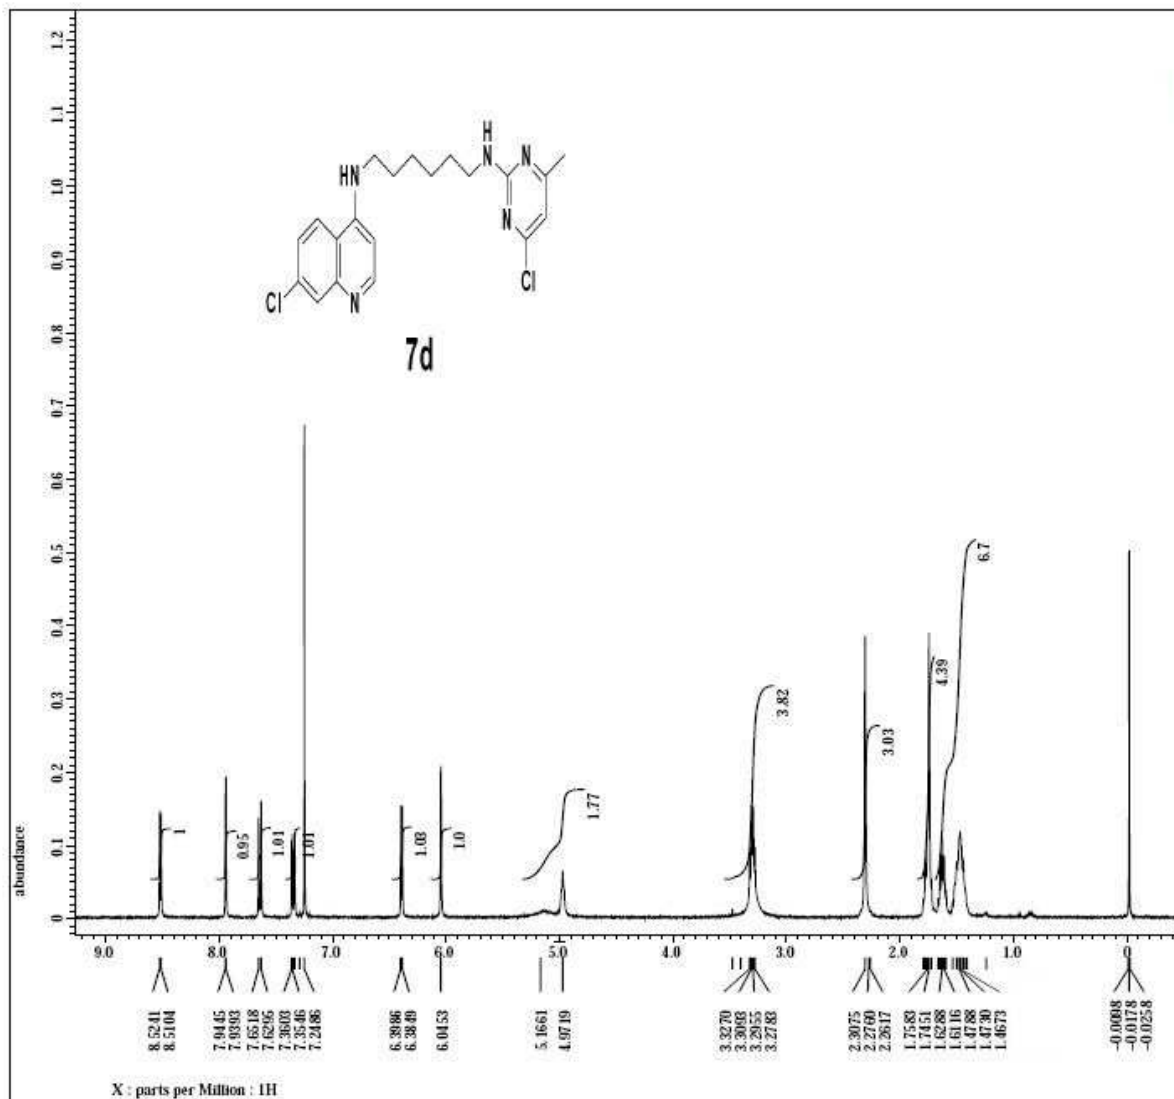

|                  |                            |
|------------------|----------------------------|
| Filename         | - DSR SM-504B-4.jdf        |
| Author           | - delta                    |
| Experiment       | - single_pulse.ex2         |
| Sample_id        | - DSR SM-504B              |
| Solvent          | - CHLOROFORM-D             |
| Creation_time    | - 24-JUN-2010 07:55:44     |
| Revision_time    | - 28-JUN-2010 10:32:20     |
| Current_time     | - 28-JUN-2010 10:32:51     |
| Comment          | - single_pulse             |
| Data_format      | - 1D COMPLEX               |
| Dim_size         | - 36214                    |
| Dim_title        | - 1H                       |
| Dim_units        | - [ppm]                    |
| Dimensions       | - X                        |
| Site             | - ECX 400P                 |
| Spectrometer     | - DELTA2_MMR               |
| Field_strength   | - 9.389766 [T] (400 [MHz]) |
| X_acq_duration   | - 4.36731904 [s]           |
| X_domain         | - 1H                       |
| X_freq           | - 399.78219838 [MHz]       |
| X_offset         | - 5 [ppm]                  |
| X_points         | - 32758                    |
| X_prescans       | - 1                        |
| X_resolution     | - 0.22897343 [Hz]          |
| X_sweep          | - 7.5030012 [kHz]          |
| IFR_domain       | - 1H                       |
| IFR_freq         | - 399.78219838 [MHz]       |
| IFR_offset       | - 5 [ppm]                  |
| Tri_domain       | - 1H                       |
| Tri_freq         | - 399.78219838 [MHz]       |
| Tri_offset       | - 5 [ppm]                  |
| Clipped          | - FALSE                    |
| Mod_return       | - 1                        |
| Scans            | - 16                       |
| Total_scans      | - 16                       |
| X_90_width       | - 11.5 [us]                |
| X_acq_time       | - 4.36731904 [s]           |
| X_angle          | - 45 [deg]                 |
| X_atn            | - 0.99 [dB]                |
| X_pulse          | - 5.75 [us]                |
| IFR_mode         | - OFF                      |
| Tri_mode         | - OFF                      |
| Dents_preat      | - FALSE                    |
| Initial_wait     | - 1 [s]                    |
| Recvr_gain       | - 42                       |
| Relaxation_delay | - 5 [s]                    |
| Repetition_time  | - 9.36731904 [s]           |
| Temp_get         | - 21.9 [dc]                |

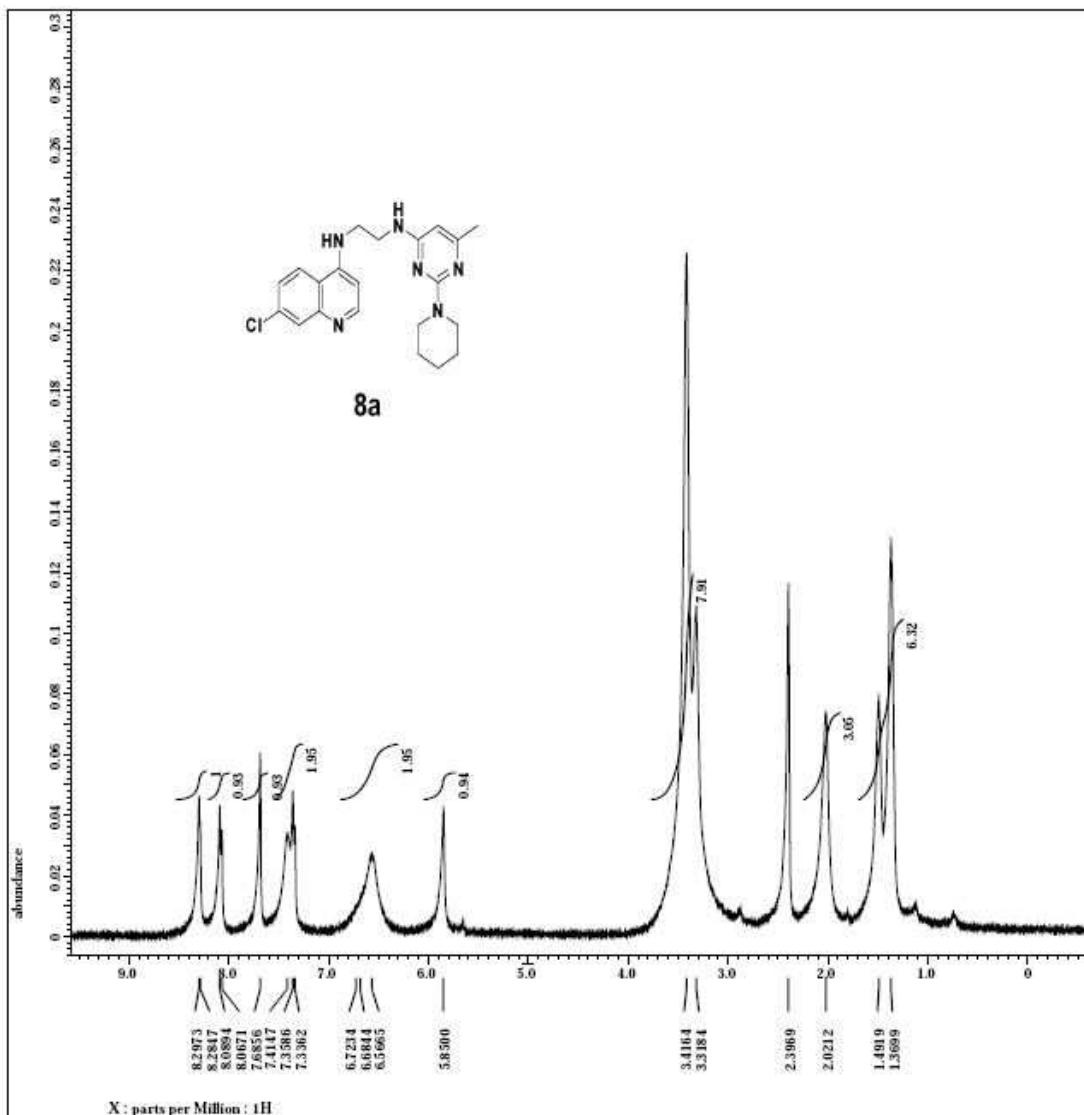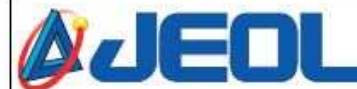

Filename - DSR SM-490-3.jdf  
 Author - delta  
 Experiment - single\_pulse.ex2  
 Sample\_id - DSR SM-490  
 Solvent - DMSO-D6  
 Creation\_time - 31-MAY-2010 17:00:31  
 Revision\_time - 31-MAY-2010 17:53:08  
 Current\_time - 31-MAY-2010 17:53:41

Comment - DSR SM-490  
 Data\_format - 1D COMPLEX  
 Dia\_size - 26214  
 Dia\_title - 1H  
 Dia\_units - [ppm]  
 Dimensions - 1  
 Site - BCI 400P  
 Spectrometer - DELTA2\_NMR

Field\_strength - 9.389766 [T] (400 [MHz])  
 K\_acq\_duration - 4.36731904 [s]  
 K\_domain - 1H  
 K\_freq - 399.78219838 [MHz]  
 K\_offset - 5 [ppm]  
 K\_points - 32768  
 K\_preescans - 1  
 K\_resolution - 0.22897343 [Hz]  
 K\_sweep - 7.5030012 [kHz]  
 IRR\_domain - 1H  
 IRR\_freq - 399.78219838 [MHz]  
 IRR\_offset - 5 [ppm]  
 Tri\_domain - 1H  
 Tri\_freq - 399.78219838 [MHz]  
 Tri\_offset - 5 [ppm]  
 Clipped - FALSE  
 Mod\_return - 1  
 Scans - 16  
 Total\_scans - 16

K\_90\_width - 11.5 [us]  
 K\_acq\_time - 4.36731904 [s]  
 K\_angle - 45 [deg]  
 K\_atn - 0.99 [dB]  
 K\_pulse - 5.75 [us]  
 IRR\_mode - off  
 Tri\_mode - off  
 Dante\_preset - FALSE  
 Initial\_wait - 1 [s]  
 Recvr\_gain - 36  
 Relaxation\_delay - 5 [s]  
 Repetition\_time - 9.36731904 [s]  
 Temp\_get - 21.3 [dC]



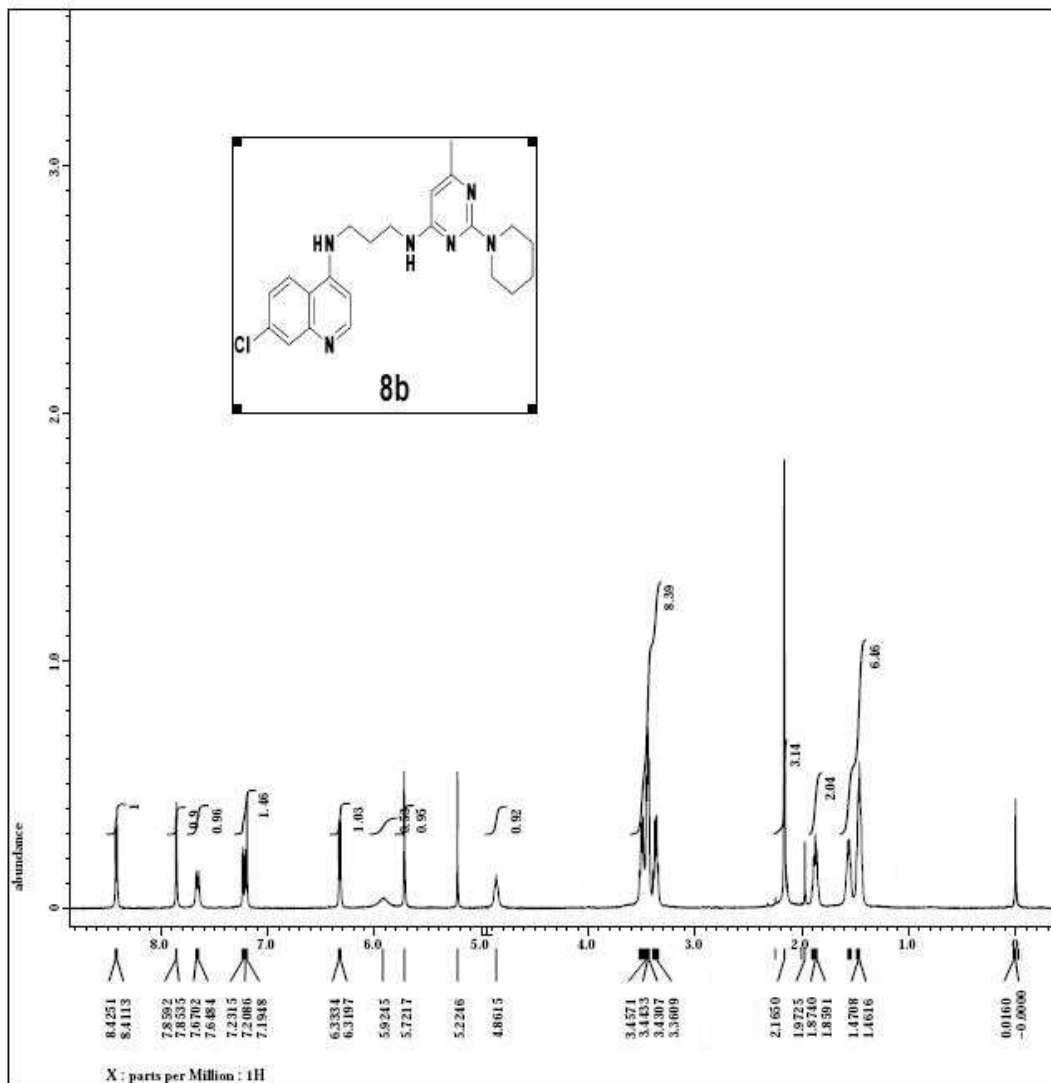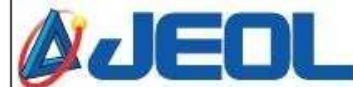

Filename - DSR\_SM-485\_PROTON-5.j  
 Author - delta  
 Experiment - single\_pulse.ex2  
 Sample\_id - DSR\_SM-485  
 Solvent - CHLOROFORM-D  
 Creation\_time - 9-JUN-2010 14:02:36  
 Revision\_time - 9-JUN-2010 16:53:22  
 Current\_time - 9-JUN-2010 16:53:46

Comment - DSR SM-485  
 Data\_format - ID COMPLEX  
 Dia\_file - 13107  
 Dia\_title - 1H  
 Dia\_unit - [ppm]  
 Dimensions - X  
 Site - ECX 400P  
 Spectrometer - DELTA2\_500

Field\_strength - 9.389766 [T] (400 [MHz])  
 K\_acq\_duration - 2.18365952 [s]  
 K\_domain - 1H  
 K\_freq - 399.78219838 [MHz]  
 K\_offset - 5 [ppm]  
 K\_points - 18384  
 K\_prescans - 1  
 K\_resolution - 0.45794685 [Hz]  
 K\_sweep - 7.5030012 [kHz]  
 Irr\_domain - 1H  
 Irr\_freq - 399.78219838 [MHz]  
 Irr\_offset - 5 [ppm]  
 Tri\_domain - 1H  
 Tri\_freq - 399.78219838 [MHz]  
 Tri\_offset - 5 [ppm]  
 Clipped - FALSE  
 Mod\_return - 1  
 Scans - 16  
 Total\_scans - 16

K\_s0\_width - 11.5 [us]  
 K\_acq\_time - 2.18365952 [s]  
 K\_angle - 45 [deg]  
 K\_atn - 0.39 [dB]  
 K\_pulse - 5.75 [us]  
 Irr\_mode - off  
 Tri\_mode - off  
 Dants\_presat - FALSE  
 Initial\_wait - 1 [s]  
 Recvr\_gain - 36  
 Relaxation\_delay - 4 [s]  
 Repetition\_time - 6.18365952 [s]  
 Temp\_get - 23.4 [dC]



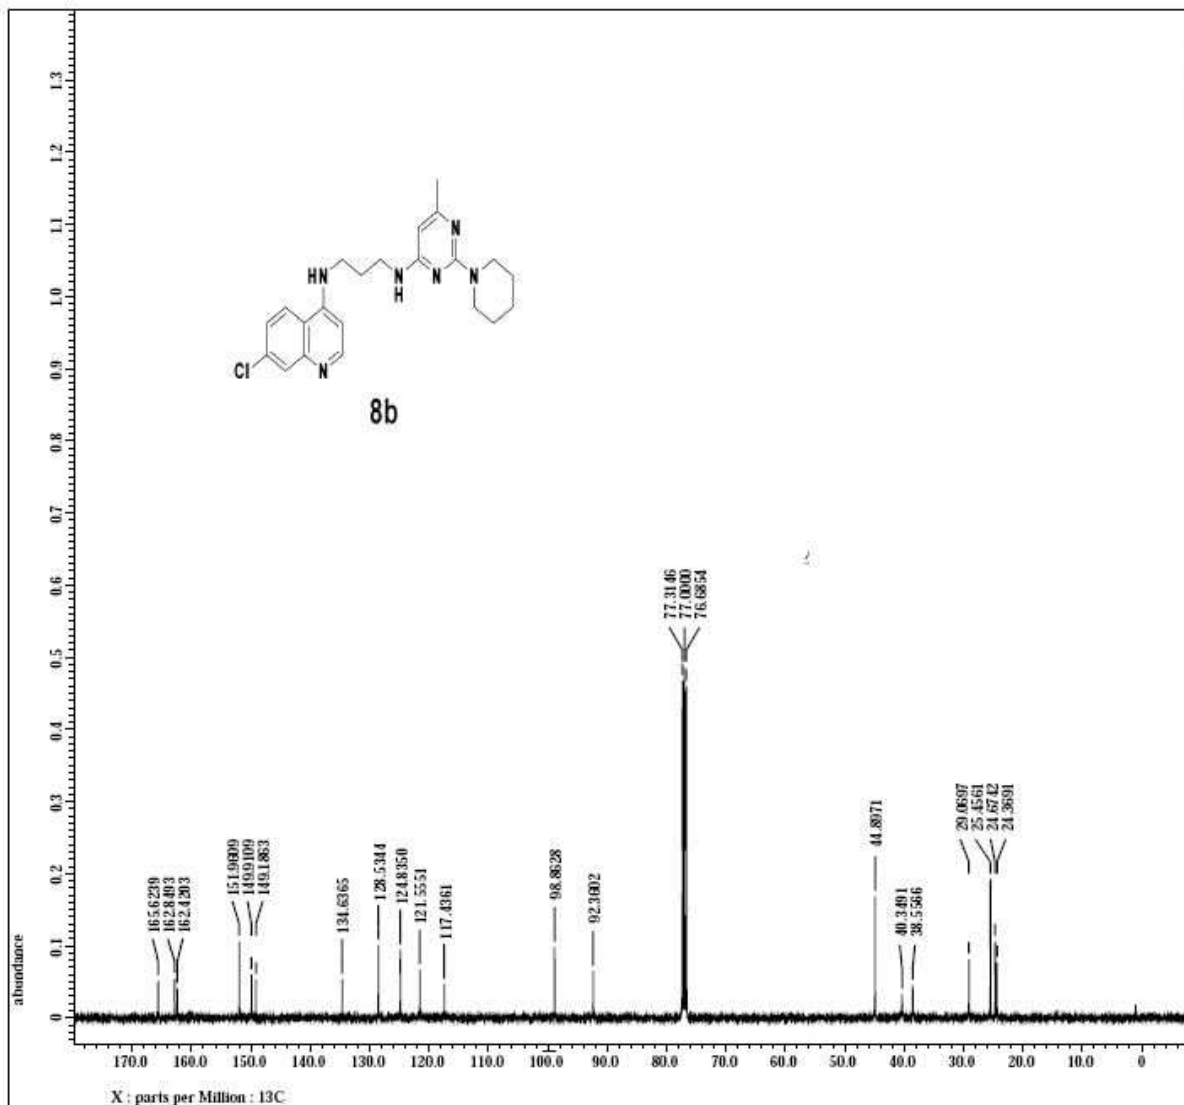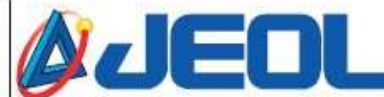

Filename - DSR SM-485\_CARBON-3.j  
 Author - delTa  
 Experiment - single\_pulse\_dec  
 Sample\_id - DSR SM-485  
 Solvent - CHLOROFORM-D  
 Creation\_time - 24-NOV-2010 22:42:45  
 Revision\_time - 24-NOV-2010 19:13:14  
 Current\_time - 29-NOV-2010 21:30:17

Comment - DSR SM-485  
 Data\_format - 1D COMPLEX  
 Dim\_size - 26214  
 Dim\_title - 13c  
 Dim\_units - [ppm]  
 Dimensions - X  
 Site - ECI 400P  
 Spectrometer - DELTA2\_MMR

Field\_strength - 9.389766 [T] (400 [MHz])  
 X\_acq\_duration - 1.04333312 [s]  
 X\_domain - 13c  
 X\_freq - 100.52530333 [MHz]  
 X\_offset - 100 [ppm]  
 X\_points - 32768  
 X\_procs - 4  
 X\_resolution - 0.95846665 [Hz]  
 X\_sweep - 31.40703518 [kHz]  
 IRR\_domain - 1H  
 IRR\_freq - 399.78219838 [MHz]  
 IRR\_offset - 5 [ppm]  
 Clipped - FALSE  
 Mod\_return - 1  
 Scans - 1000  
 Total\_scans - 1000

X\_90\_width - 11.75 [us]  
 X\_acq\_time - 1.04333312 [s]  
 X\_angle - 30 [deg]  
 X\_atn - 10 [dB]  
 X\_pulse - 3.91666667 [us]  
 IRR\_atn\_dec - 24.95 [dB]  
 IRR\_atn\_noc - 24.95 [dB]  
 IRR\_noise - WALTZ  
 Decoupling - TRUE  
 Initial\_wait - 1 [s]  
 Noe - TRUE  
 Noe\_time - 2 [s]  
 Recvr\_gain - 58  
 Relaxation\_delay - 2 [s]  
 Repetition\_time - 3.04333312 [s]  
 Temp\_get - 22.1 [dC]

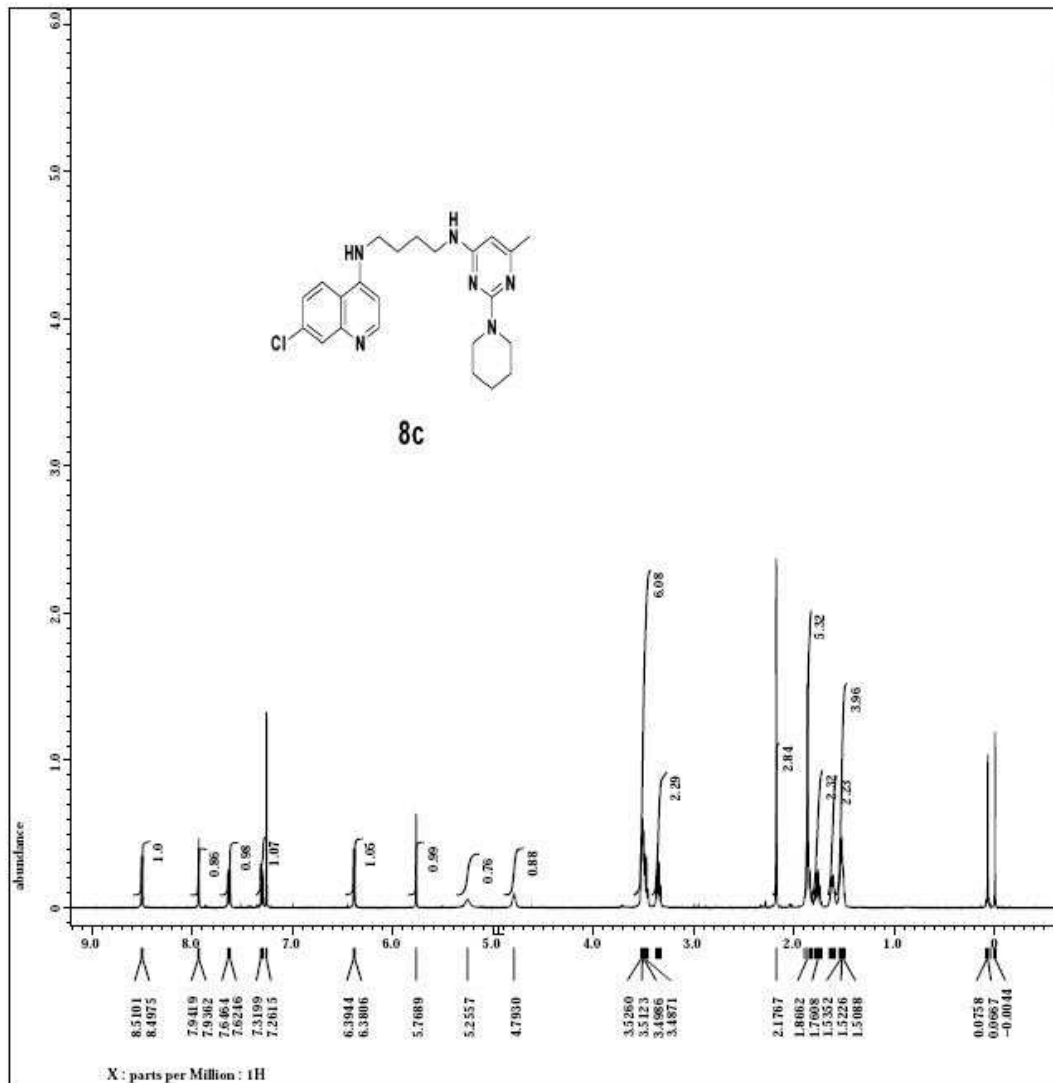


|                  |                            |
|------------------|----------------------------|
| Filename         | - DSR_SM-499_PROTON-5.j    |
| Author           | - delta                    |
| Experiment       | - single_pulse.exe2        |
| Sample Id        | - DSR_SM-499               |
| Solvent          | - CHLOROFORM-D             |
| Creation_time    | - 15-JUN-2010 15:12:18     |
| Revision_time    | - 15-JUN-2010 16:20:59     |
| Current_time     | - 15-JUN-2010 16:21:14     |
| Comment          | - DSR_SM-499               |
| Data_format      | - 1D COMPLETE              |
| Dir_size         | - 13107                    |
| Dir_title        | - 1H                       |
| Dir_units        | - [ppm]                    |
| Dimensions       | - 2                        |
| Site             | - ECI 400P                 |
| Spectrometer     | - DELTA2_MHS               |
| Field_strength   | - 9.389766 [T] (400 [MHz]) |
| K_acq_duration   | - 2.18365952 [s]           |
| K_domain         | - 1H                       |
| K_freq           | - 399.78219838 [MHz]       |
| K_offset         | - 5 [ppm]                  |
| K_points         | - 16384                    |
| K_preampl        | - 1                        |
| K_resolution     | - 0.45794685 [Hz]          |
| K_sweep          | - 7.5030012 [kHz]          |
| Irr_domain       | - 1H                       |
| Irr_freq         | - 399.78219838 [MHz]       |
| Irr_offset       | - 5 [ppm]                  |
| Tri_domain       | - 1H                       |
| Tri_freq         | - 399.78219838 [MHz]       |
| Tri_offset       | - 5 [ppm]                  |
| Clipped          | - FALSR                    |
| Mod_return       | - 1                        |
| Scans            | - 16                       |
| Total_scans      | - 16                       |
| K_s0_width       | - 11.5 [usec]              |
| K_acq_time       | - 2.18365952 [s]           |
| K_angle          | - 45 [deg]                 |
| K_atn            | - 0.33 [dB]                |
| K_pulse          | - 5.75 [usec]              |
| Irr_mode         | - off                      |
| Tri_mode         | - off                      |
| Intc_preset      | - FALSR                    |
| Initial_wait     | - 1 [s]                    |
| Recvr_gain       | - 40                       |
| Relaxation_delay | - 4 [s]                    |
| Repetition_time  | - 6.18365952 [s]           |
| Temp_get         | - 24.4 [degC]              |

X : parts per Million : 1H

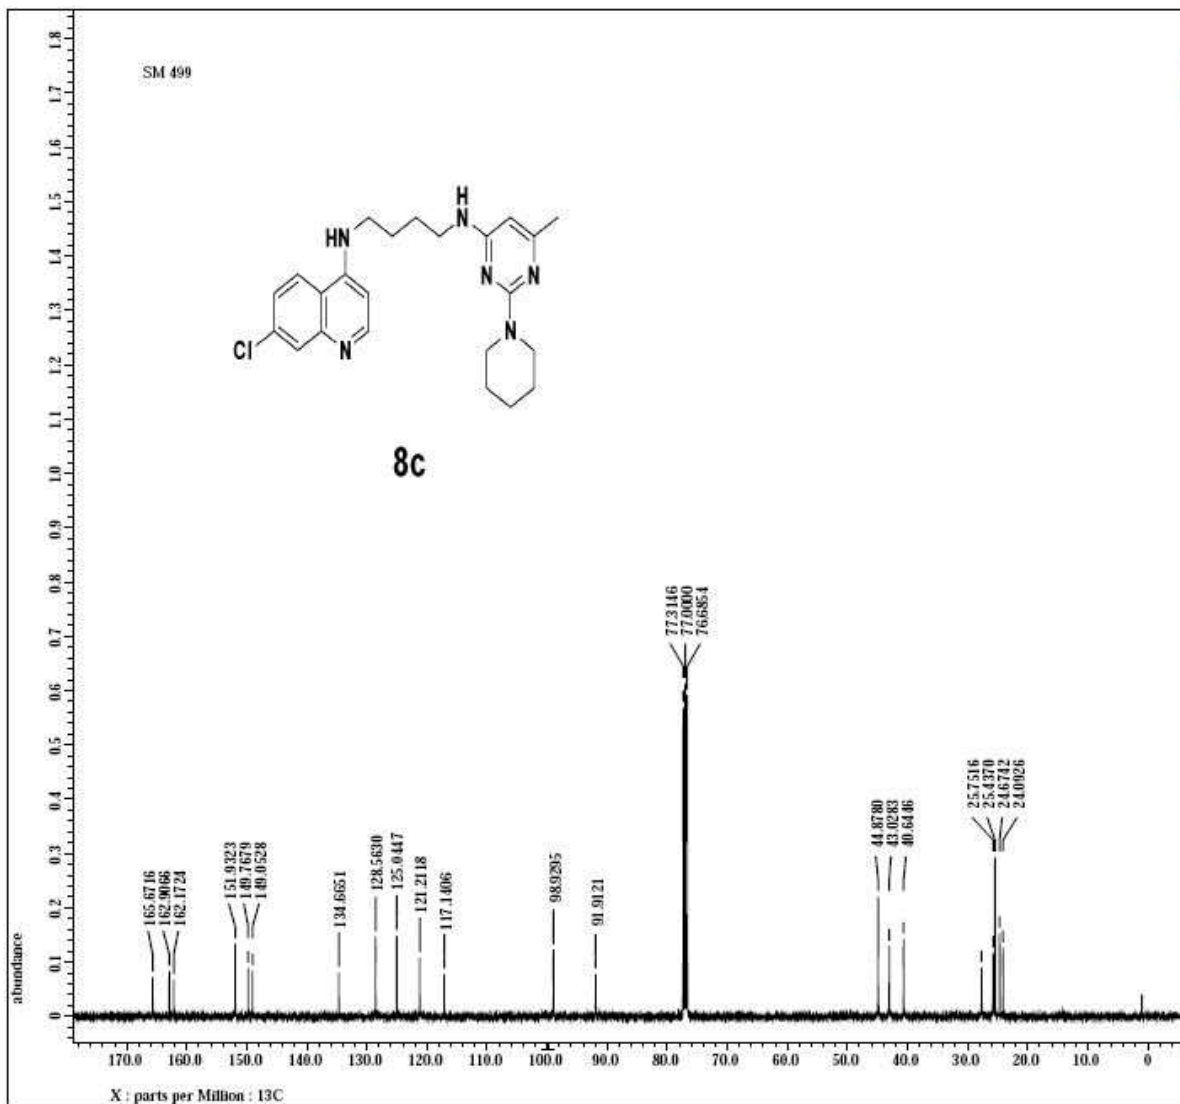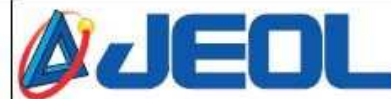

```

Filename      = DSR SM-499 CARBON-4.j
Author        = delta
Experiment    = single_pulse_dec
Sample_id     = DSR SM-499
Solvent       = CHLOROFORM-D
Creation_time = 2-DEC-2010 05:39:05
Revision_time = 3-DEC-2010 22:08:13
Current_Time  = 3-DEC-2010 22:08:25

Comment      = DSR SM-499
Data_format   = 1D COMPLEX
Dim_size      = 26214
Dim_title     = 13c
Dim_units     = [ppm]
Dimensions    = X
Site          = ECX 400P
Spectrometer  = DELTA2_NMR

Field_strength = 9.399766 [T] (400 [MHz])
F1_acq_duration = 1.04333312 [s]
F1_domain      = 13c
F1_freq        = 100.52530333 [MHz]
F1_offset      = 100 [ppm]
F1_points      = 32748
F1_prescans    = 4
F1_resolution = 0.95846665 [Hz]
F1_sweep       = 31.40703518 [kHz]
F1_domain      = 18
F1_freq        = 399.78219838 [MHz]
F1_offset      = 5 [ppm]
clipped       = FALSE
Mod_return     = 1
Scans          = 1000
Total_scans    = 1000

F2_90_width    = 11.75 [us]
F2_acq_time    = 1.04333312 [s]
F2_angle       = 30 [deg]
F2_atn         = 10 [dB]
F2_pulse       = 3.91666667 [us]
F2_atn_dec     = 24.95 [dB]
F2_atn_noc     = 24.95 [dB]
F2_noise       = WALTZ
Decoupling     = TRUE
Initial_wait   = 1 [s]
Noise         = TRUE
Noe_time       = 2 [s]
Recvr_gain     = 60
Relaxation_delay = 2 [s]
Repetition_time = 3.04333312 [s]
Temp_get       = 21.8 [dc]
  
```

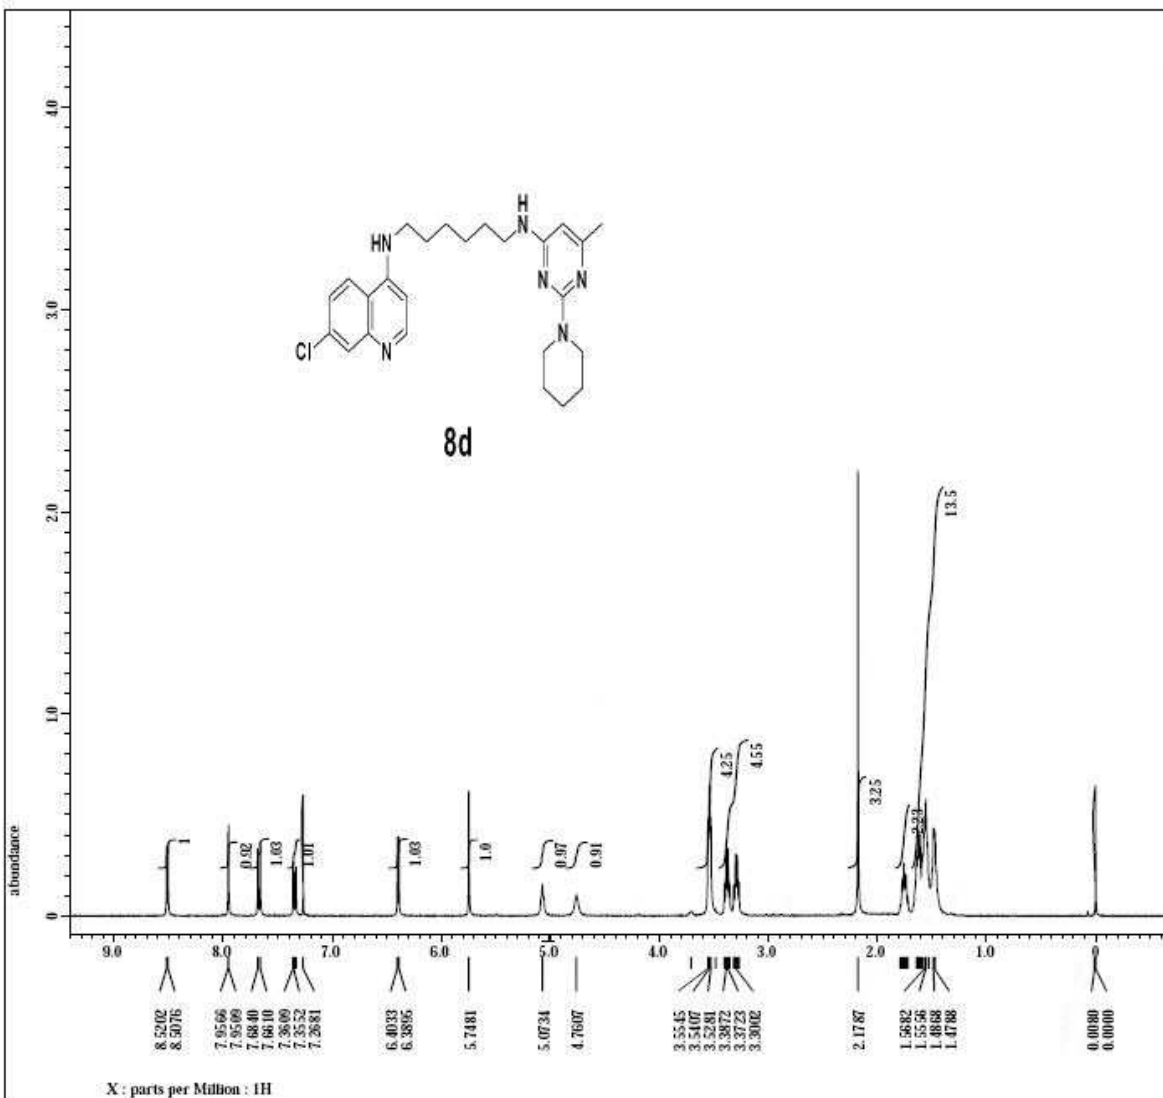


|                  |                            |
|------------------|----------------------------|
| Filename         | - DSR_SH-505_PROTON-5.j    |
| Author           | - delta                    |
| Experiment       | - single_pulse.ex2         |
| Sample_id        | - DSR_SH-505               |
| Solvent          | - CHLOROFORM-D             |
| Creation_time    | - 23-JUN-2010 14:20:42     |
| Revision_time    | - 28-JUN-2010 10:53:25     |
| Current_time     | - 28-JUN-2010 10:53:44     |
| Comment          | - DSR_SH-505               |
| Data_format      | - 1D_COMPLEX               |
| Dim_size         | - 13107                    |
| Dim_title        | - 1H                       |
| Dim_units        | - [ppm]                    |
| Dimensions       | - X                        |
| Site             | - ECX 400P                 |
| Spectrometer     | - DELTA2_MMR               |
| Field_strength   | - 9.389766 [T] (400 [MHz]) |
| X_acq_duration   | - 2.18365952 [s]           |
| X_domain         | - 1H                       |
| X_freq           | - 399.78219838 [MHz]       |
| X_offset         | - 5 [ppm]                  |
| X_points         | - 16384                    |
| X_procscan       | - 1                        |
| X_resolution     | - 0.45794685 [Hz]          |
| X_sweep          | - 7.5030012 [kHz]          |
| Irr_domain       | - 1H                       |
| Irr_freq         | - 399.78219838 [MHz]       |
| Irr_offset       | - 5 [ppm]                  |
| Tri_domain       | - 1H                       |
| Tri_freq         | - 399.78219838 [MHz]       |
| Tri_offset       | - 5 [ppm]                  |
| Clipped          | - FALSE                    |
| Mod_return       | - 1                        |
| Scans            | - 16                       |
| Total_scans      | - 16                       |
| X_90_width       | - 11.5 [us]                |
| X_acq_time       | - 2.18365952 [s]           |
| X_angle          | - 45 [deg]                 |
| X_atn            | - 0.99 [dB]                |
| X_pulse          | - 5.75 [us]                |
| Irr_mode         | - Off                      |
| Tri_mode         | - Off                      |
| Dante_preset     | - FALSE                    |
| Initial_wait     | - 1 [s]                    |
| Recvr_gain       | - 40                       |
| Relaxation_delay | - 4 [s]                    |
| Repetition_time  | - 6.18365952 [s]           |
| Temp_get         | - 24 [dc]                  |

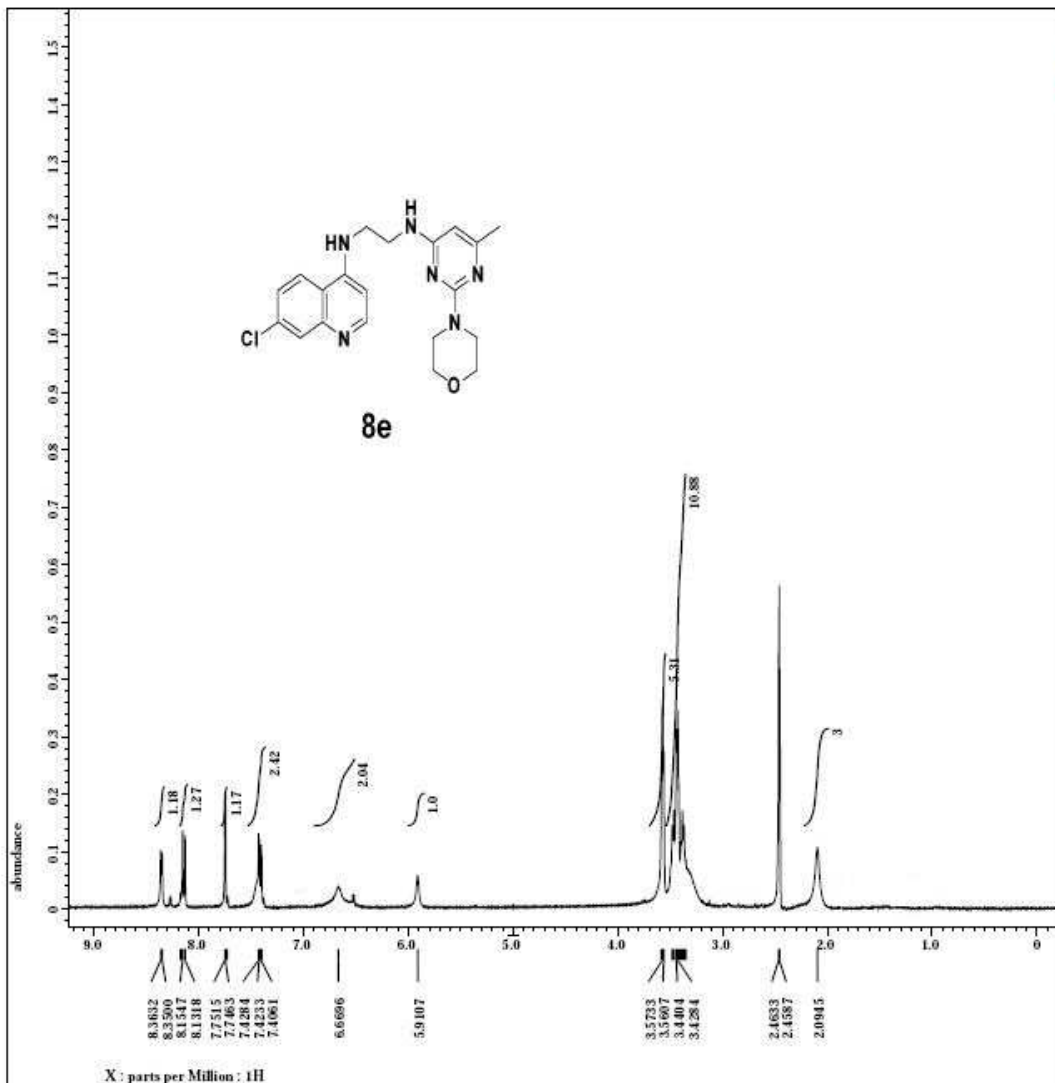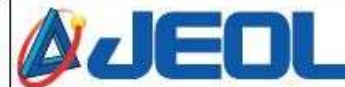

```

Filename      - DER SM-489-3.jdf
Author        - delta
Experiment    - single_pulse.ex2
Sample_id     - DER SM-489
Solvent       - DMSO-D6
Creation_time - 26-MAY-2010 14:01:27
Revision_time - 26-MAY-2010 15:56:40
Current_Time  - 26-MAY-2010 15:56:57

Comment       - DER SM-489
Data_format   - ID COMPLEX
Dia_size      - 26214
Dia_title     - 1H
Dia_units     - [ppm]
Dimensions    - 1
Site          - BCX 400P
Spectrometer  - DELTA2_MMR

Field_strength - 9.389766 [T] (400 [MHz])
K_acq_duration - 4.36731904[s]
K_domain      - 1H
K_freq        - 399.78219838 [MHz]
K_offset      - 5 [ppm]
K_points      - 32768
K_prescans    - 1
K_resolution  - 0.22887343 [Hz]
K_sweep       - 7.5030012 [kHz]
IRF_domain    - 1H
IRF_freq      - 399.78219838 [MHz]
IRF_offset    - 5 [ppm]
Tri_domain    - 1H
Tri_freq      - 399.78219838 [MHz]
Tri_offset    - 5 [ppm]
Clipped       - FALSE
Mod_return    - 1
Scans         - 16
Total_scans   - 16

K_90_width   - 11.5 [us]
K_acq_time    - 4.36731904[s]
K_angle       - 45 [deg]
K_atn         - 0.99 [dB]
K_pulse       - 5.75 [us]
IRF_mode      - Off
Tri_mode      - Off
Dante_preset - FALSE
Initial_wait  - 1[s]
Reovr_gain    - 40
Relaxation_delay - 5[s]
Repetition_time - 9.36731904[s]
Temp_get      - 22.5 [dC]
  
```

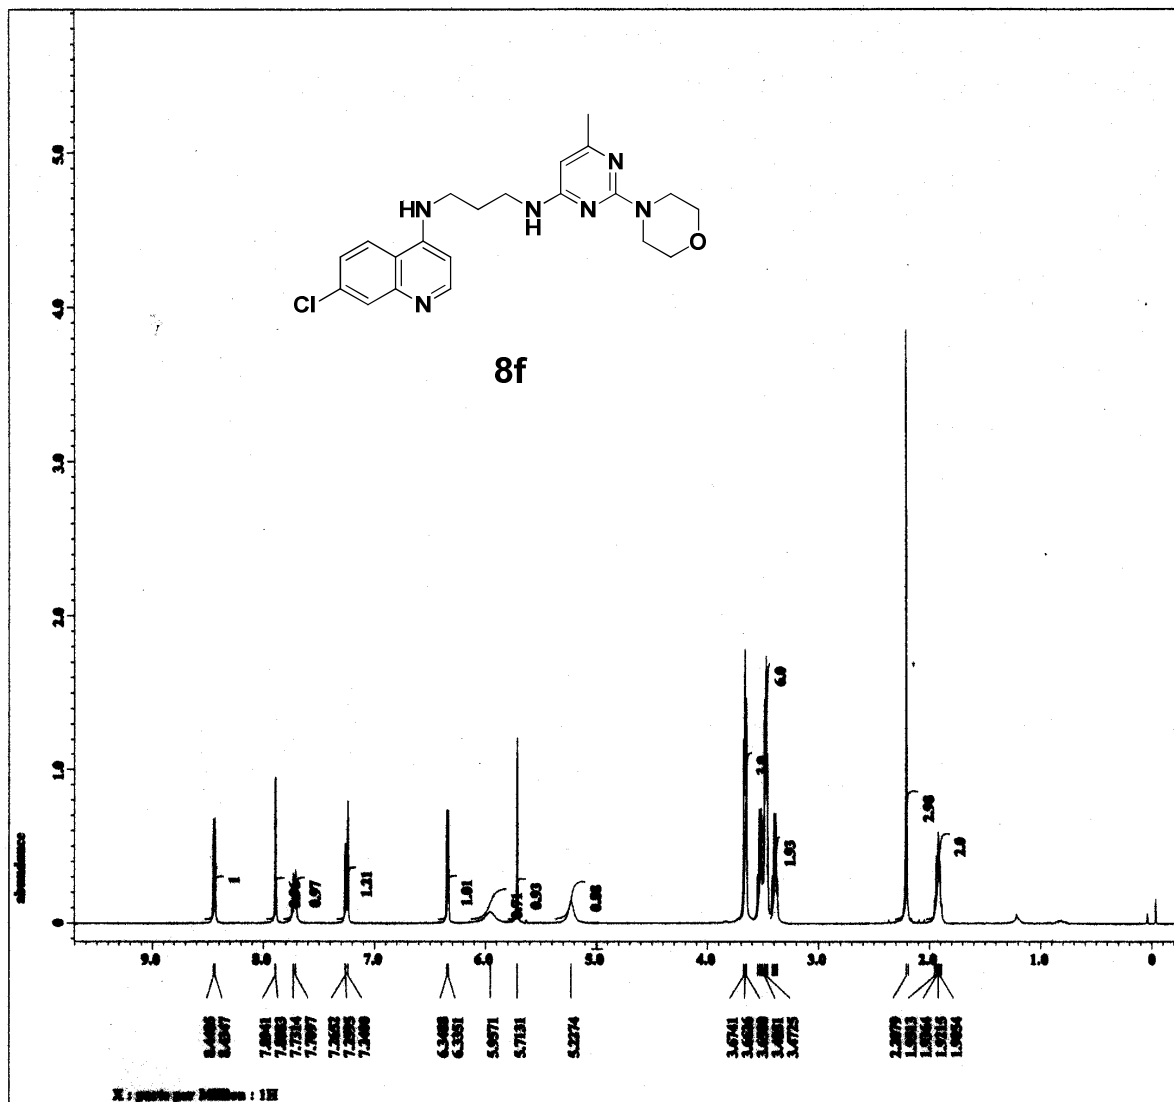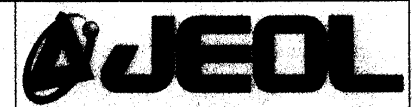

```

Filename      = D01_00-493_00700-0.j
Author        = dnlm
Experiment    = simple_pulse_002
Sample_ID     = DM_00-493
Solvent       = CDCl3
Creation_time = 5-JUN-2010 15:34:40
Revision_time = 5-JUN-2010 21:02:48
Current_time  = 5-JUN-2010 21:04:18

Comment       = DM_00-493
Data_format   = 1D_COSY
File_name     = 13107
File_title    = 131
File_units    = (ppm)
Dimensions    = 2
Site          = MCL 400P
Spectrometer  = DELTA 400

Field_strength = 5.282765 [T] (400 MHz)
X_acq_duration = 2.12369958 [s]
X_domain       = 10
X_freq         = 399.78219838 [MHz]
X_offset       = 8 [ppm]
X_points       = 1024
X_processing   = 1
X_resolution   = 0.48794685 [Hz]
X_sweep        = 7.5030013 [kHz]
Xr_domain      = 10
Xr_freq        = 399.78219838 [MHz]
Xr_offset       = 8 [ppm]
Xr_domain      = 10
Xr_freq        = 399.78219838 [MHz]
Xr_offset       = 8 [ppm]
Clipped        = 70128
Mod_return     = 1
Name           = 131
Total_points   = 16

X_pulse_width = 11.5 [us]
X_pulse_time  = 2.12369958 [s]
X_pulse       = 48 [deg]
X_pulse       = 0.59 [ns]
X_pulse       = 5.79 [us]
Xr_pulse       = 0.82
Xr_pulse       = 0.82
Xr_pulse       = 70128
Initial_pulse = 1 [s]
Nucrv_gain     = 34
Relaxation_delay = 4 [s]
Repetition_time = 6.12369958 [s]
Temp_get       = 23.9 [C]

```

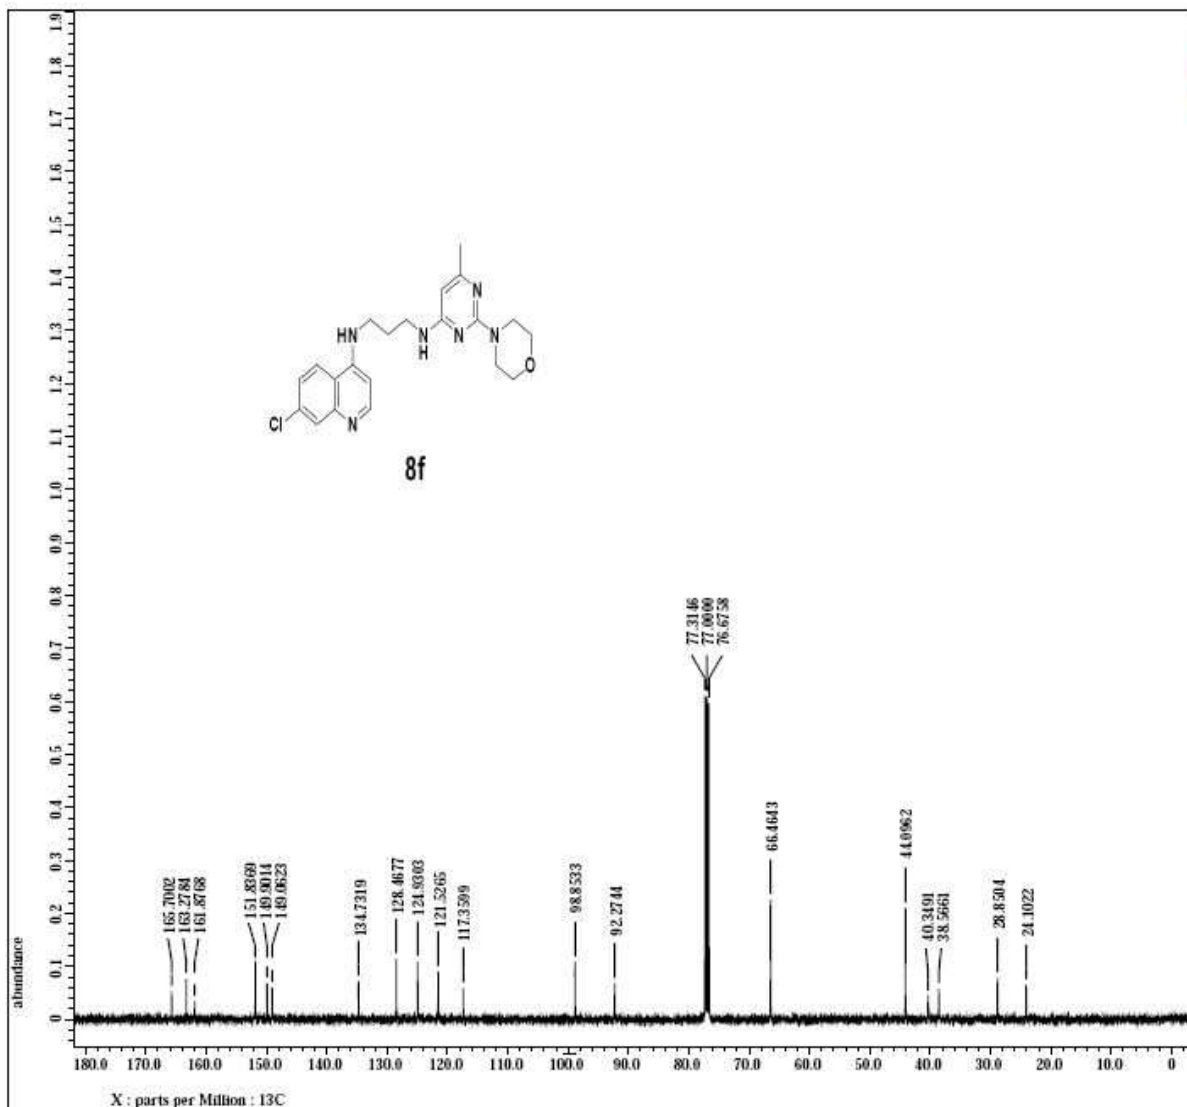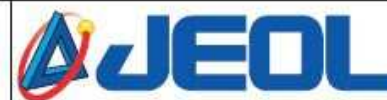

Filename - DSR\_SM-493\_CARBON-4.j  
 Author - delta  
 Experiment - single\_pulse\_dec  
 Sample\_id - DSR\_SM-493  
 Solvent - CHLOROFORM-D  
 Creation\_time - 29-NOV-2010 20:17:17  
 Revision\_time - 1-DEC-2010 22:17:46  
 Current\_time - 1-DEC-2010 22:19:13

Comment - DSR\_SM-493  
 Data\_format - 1D\_COMPLEX  
 Dim\_01s - 26214  
 Dim\_title - 13c  
 Dim\_units - [ppm]  
 Dimensions - 2  
 Site - EXY 400P  
 Spectrometer - DELTA2\_NMR

Field\_strength - 9.389766 [T] (400 [MHz])  
 X\_acq\_duration - 1.04333312 [s]  
 X\_domain - 13c  
 X\_freq - 100.52530333 [MHz]  
 X\_offset - 100 [ppm]  
 X\_points - 32768  
 X\_prescans - 4  
 X\_resolution - 0.95846665 [Hz]  
 X\_sweep - 31.40703518 [kHz]  
 Irr\_domain - 1H  
 Irr\_freq - 399.78219838 [MHz]  
 Irr\_offset - 5 [ppm]  
 Clipped - FALSE  
 Mod\_return - 1  
 Scans - 750  
 Total\_scans - 750

X\_90\_width - 11.75 [us]  
 X\_acq\_time - 1.04333312 [s]  
 X\_angle - 30 [deg]  
 X\_atn - 10 [dB]  
 X\_pulse - 3.91666667 [us]  
 Irr\_atn\_dec - 24.95 [dB]  
 Irr\_atn\_noc - 24.95 [dB]  
 Irr\_noise - WALTZ  
 Decoupling - TRUE  
 Initial\_wait - 1 [s]  
 Noe - TRUE  
 Noe\_time - 2 [s]  
 Recvr\_gain - 60  
 Relaxation\_delay - 2 [s]  
 Repetition\_time - 1.04333312 [s]  
 Temp\_get - 24.3 [C]



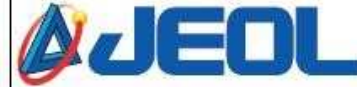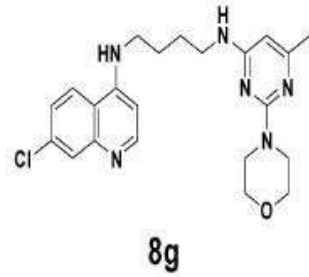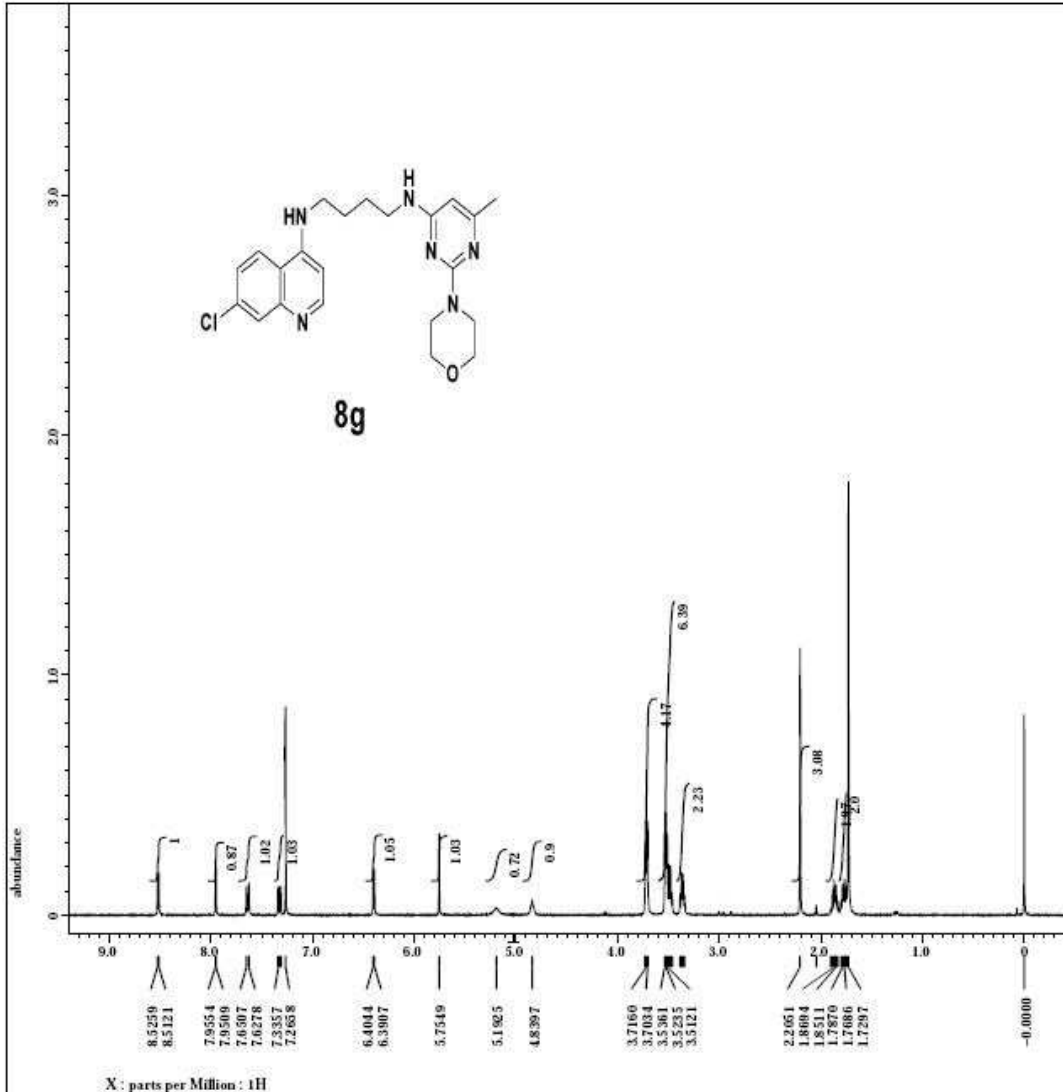

Filename = DSR\_SM-500\_PROTON-5.j  
 Author = delta  
 Experiment = single\_pulse.ex2  
 Sample\_id = DSR\_SM-500  
 Solvent = CHLOROFORM-D  
 Creation\_time = 18-JUN-2010 14:27:02  
 Revision\_time = 18-JUN-2010 16:24:44  
 Current\_time = 18-JUN-2010 16:25:07

Comment = DSR\_SM-500  
 Data\_format = 1D\_COMPLXI  
 Dia\_size = 13107  
 Dia\_title = 1H  
 Dia\_units = [ppm]  
 Dimensions = 2  
 Site = ECI 400P  
 Spectrometer = DELTA2\_MNR

Field\_strength = 9.389766 [T] (400 [MHz])  
 K\_acq\_duration = 2.18365952 [s]  
 K\_domain = 1H  
 K\_freq = 399.78219838 [MHz]  
 K\_offset = 5 [ppm]  
 K\_points = 16384  
 K\_preacans = 1  
 K\_resolution = 0.45794685 [Hz]  
 K\_sweep = 7.5030012 [kHz]  
 Irr\_domain = 1H  
 Irr\_freq = 399.78219838 [MHz]  
 Irr\_offset = 5 [ppm]  
 Tri\_domain = 1H  
 Tri\_freq = 399.78219838 [MHz]  
 Tri\_offset = 5 [ppm]  
 Clipped = FALSE  
 Mod\_return = 1  
 Scans = 16  
 Total\_scans = 16

K\_s0\_width = 11.5 [us]  
 K\_acq\_time = 2.18365952 [s]  
 K\_angle = 45 [deg]  
 K\_atn = 0.39 [dB]  
 K\_pulse = 5.75 [us]  
 Irr\_mode = off  
 Tri\_mode = off  
 Dante\_preset = FALSE  
 Initial\_wait = 1 [s]  
 Recvr\_gain = 42  
 Relaxation\_delay = 4 [s]  
 Repetition\_time = 6.18365952 [s]  
 Temp\_gat = 22.8 [dC]



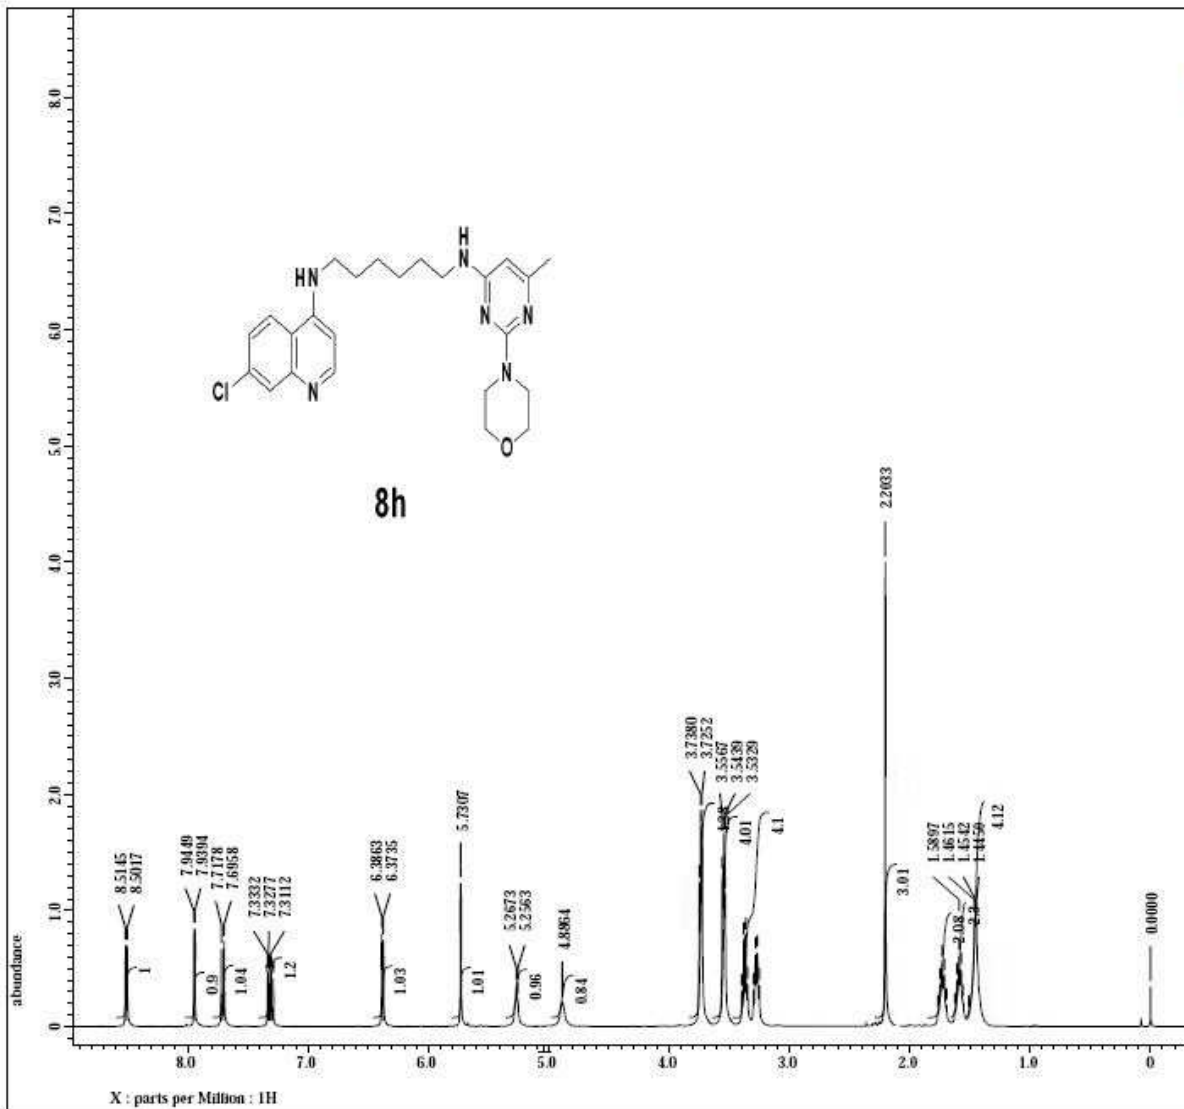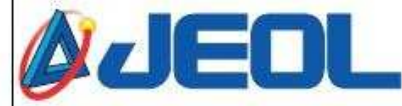

```

Filename      = DSR_SM-506_PROTON-5.j
Author       = ds1ca
Experiment   = single_pulse.ex2
Sample_id    = DSR_SM-506
Solvent      = CHLOROFORM-D
Creation_time = 10-DEC-2010 13:56:08
Revision_time = 23-JUN-2011 23:44:58
Current_time  = 23-JUN-2011 23:45:58

Comment      = DSR SM-506
Data_format  = 1D COMPLEX
Dim_size     = 13107
Dim_title    = 1H
Dim_units    = [ppm]
Dimensions   = X
Site         = ECX 400P
Spectrometer = DELTA2 NMR

Field_strength = 9.389766 [T] (400 [MHz])
X_acq_duration = 1.36577024 [s]
X_domain       = 1H
X_freq         = 399.78219838 [MHz]
X_offset       = 5 [ppm]
X_points       = 16384
X_prescans     = 1
X_resolution   = 0.73218757 [Hz]
X_sweep        = 11.99616123 [kHz]
Irr_domain     = 1H
Irr_freq       = 399.78219838 [MHz]
Irr_offset     = 5 [ppm]
Tri_domain     = 1H
Tri_freq       = 399.78219838 [MHz]
Tri_offset     = 5 [ppm]
Clipped        = FALSE
Mod_return     = 1
Scans          = 16
Total_scans    = 16

X_90_width    = 11.57 [us]
X_acq_time     = 1.36577024 [s]
X_angle        = 45 [deg]
X_atn          = 5 [dB]
X_pulse        = 5.785 [us]
Irr_mode       = Off
Tri_mode       = Off
Dante_preat    = FALSE
Initial_wait   = 1 [s]
Reover_gain    = 28
Relaxation_delay = 4 [s]
Repetition_time = 5.36577024 [s]
Temp_get       = 20.9 [dc]
  
```

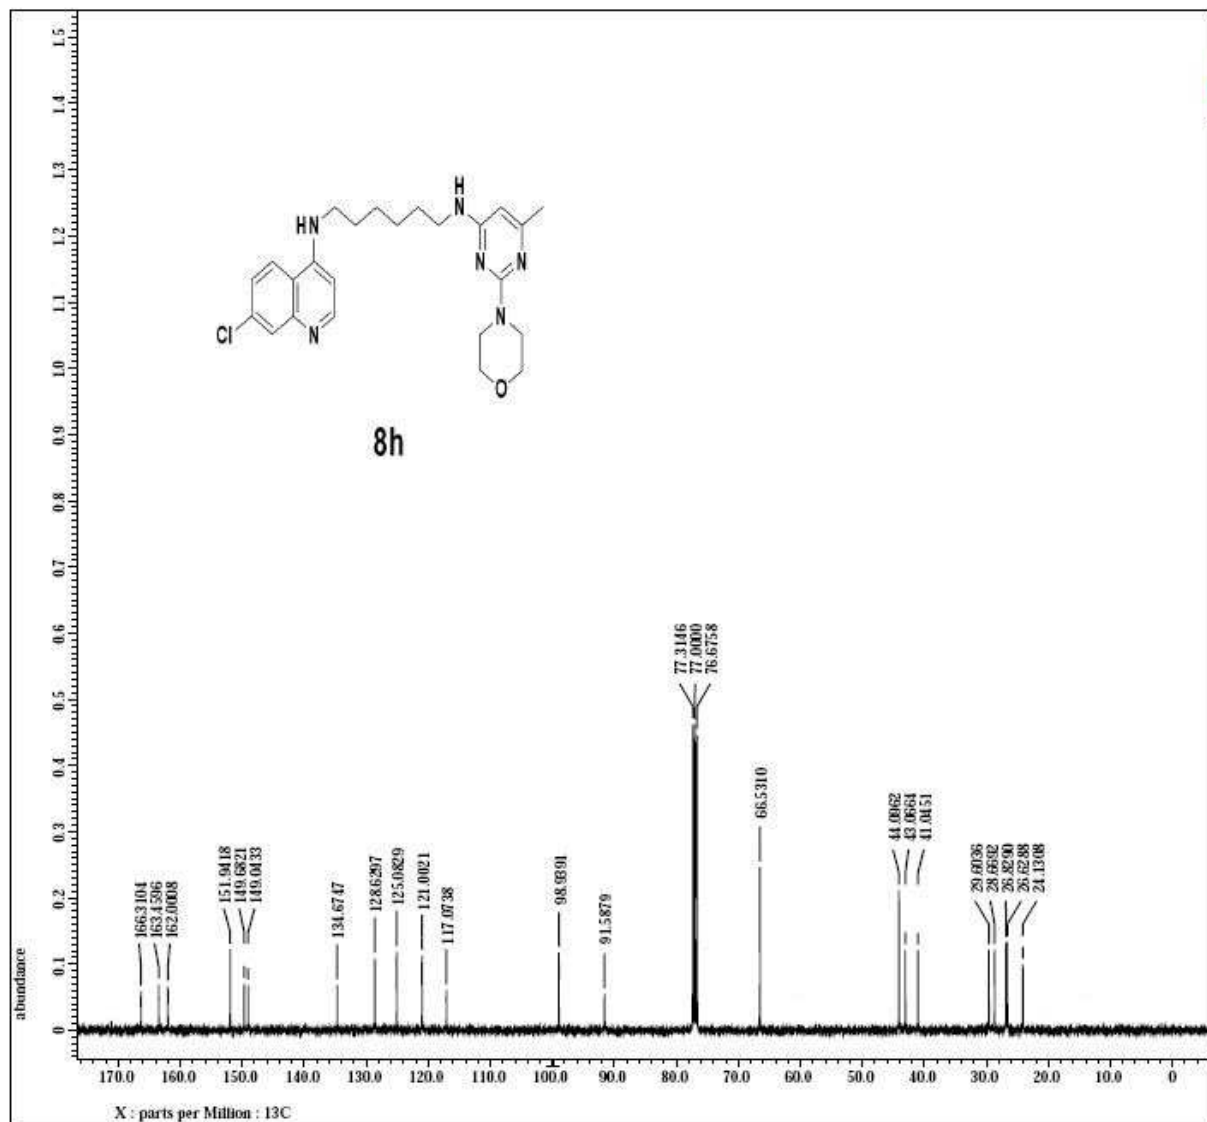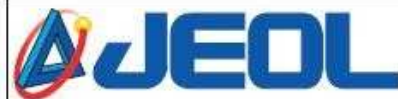

Filename - DSR SM-506\_CARBON-4.j  
 Author - delta  
 Experiment - single\_pulse\_dec  
 Sample\_id - DSR SM-506  
 Solvent - CHLOROFORM-D  
 Creation\_time - 9-DEC-2010 00:18:00  
 Revision\_time - 23-JUN-2011 23:20:22  
 Current\_time - 23-JUN-2011 23:22:00

Comment - DSR SM-506  
 Data format - 1D COMPLEX  
 Dim\_size - 26214  
 Dim\_title - 13C  
 Dim\_units - [ppm]  
 Dimensions - 2  
 Site - SCX 400P  
 Spectrometer - DELTA2\_MMR

Field\_strength - 9.399766 [T] (400 [MHz])  
 X\_acq\_duration - 1.04333312 [s]  
 X\_domain - 13C  
 X\_freq - 100.52530333 [MHz]  
 X\_offset - 100 [ppm]  
 X\_points - 32768  
 X\_procscans - 4  
 X\_resolution - 0.95846665 [Hz]  
 X\_sweep - 21.40703518 [kHz]  
 Irr\_domain - 1H  
 Irr\_freq - 399.78219838 [MHz]  
 Irr\_offset - 5 [ppm]  
 Clipped - FALSE  
 Mod\_return - 1  
 Scans - 750  
 Total\_scans - 750

X\_90\_width - 11.75 [us]  
 X\_acq\_time - 1.04333312 [s]  
 X\_angle - 30 [deg]  
 X\_atn - 10 [dB]  
 X\_pulse - 3.91666667 [us]  
 Irr\_atn\_dec - 24.95 [dB]  
 Irr\_atn\_noe - 24.95 [dB]  
 Irr\_noise - WALTZ  
 Decoupling - TRUE  
 Initial\_wait - 1 [s]  
 Noe - TRUE  
 Noe\_time - 2 [s]  
 Recvr\_gain - 58  
 Relaxation\_delay - 2 [s]  
 Repetition\_time - 3.04333312 [s]  
 Temp\_get - 21.4 [dc]

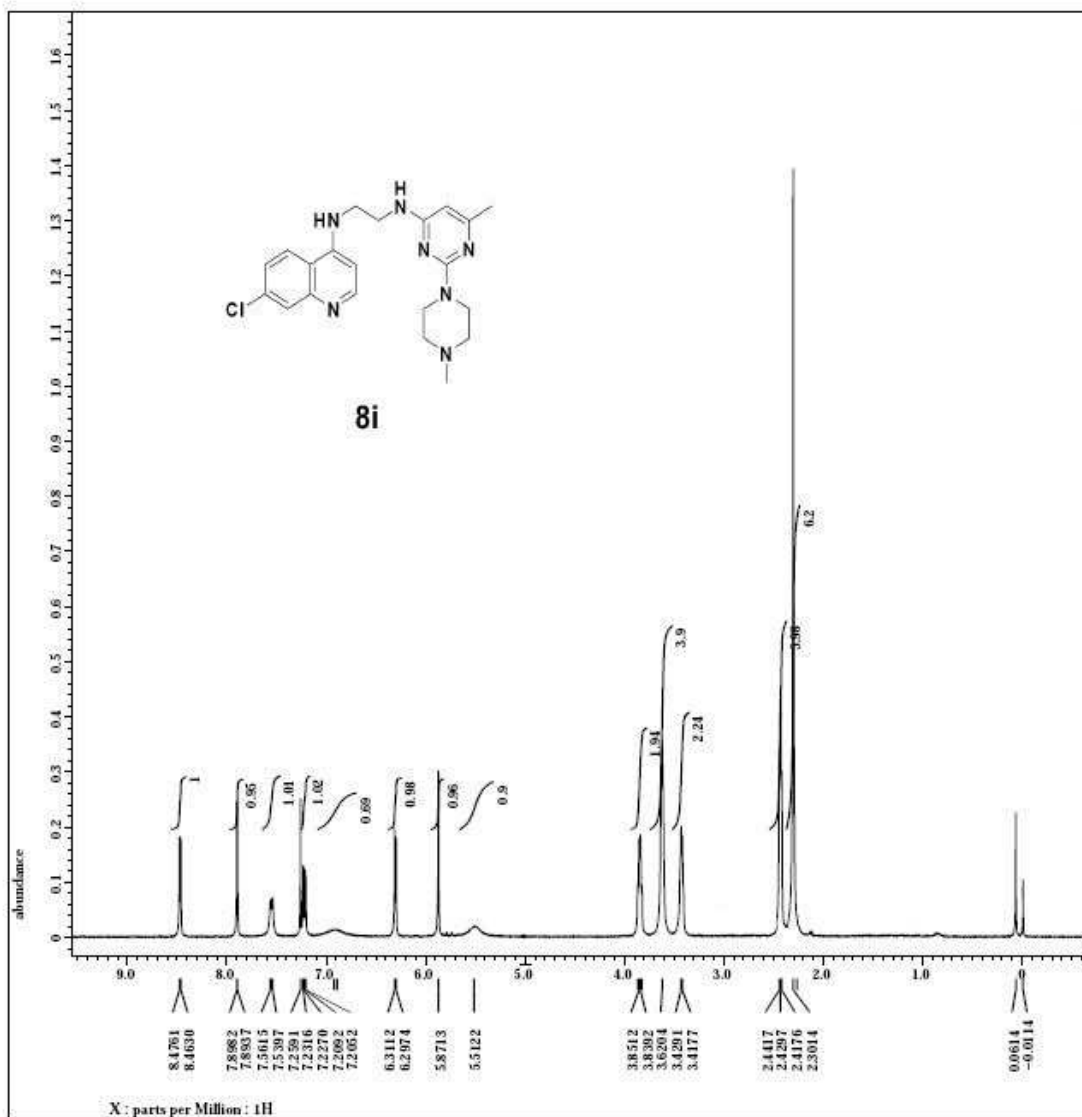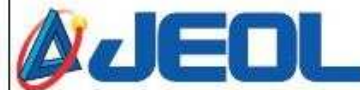

Filename = DSR SM-491-3.jdr  
 Author = ds1ta  
 Experiment = single pulse.ex2  
 Sample id = DSR SM-491  
 Solvent = CHLOROFORM-D  
 Creation time = 1-JUN-2010 14:14:28  
 Revision time = 1-JUN-2010 12:38:55  
 Current time = 1-JUN-2010 12:39:14

Comment = DSR SM-491  
 Data format = 1D COMPLEX  
 Dia\_size = 26214  
 Dia\_title = 1H  
 Dia\_unit = [ppm]  
 Dimensions = 2  
 Site = EXY 400P  
 Spectrometer = DELTA2\_NMR

Field\_strength = 9.389766 [T] (400 [MHz])  
 X\_acq\_duration = 4.36731904 [s]  
 X\_domain = 1H  
 X\_freq = 399.78219838 [MHz]  
 X\_offset = 5 [ppm]  
 X\_points = 32768  
 X\_prescans = 1  
 X\_resolution = 0.22897943 [Hz]  
 X\_sweep = 7.5030012 [kHz]  
 Irr\_domain = 1H  
 Irr\_freq = 399.78219838 [MHz]  
 Irr\_offset = 5 [ppm]  
 Tri\_domain = 1H  
 Tri\_freq = 399.78219838 [MHz]  
 Tri\_offset = 5 [ppm]  
 Clipped = FALSE  
 Mod\_return = 1  
 Scans = 16  
 Total\_scans = 16

X\_90\_width = 11.5 [usec]  
 X\_acq\_time = 4.36731904 [s]  
 X\_angle = 45 [deg]  
 X\_atn = 0.39 [dB]  
 X\_pulse = 5.75 [usec]  
 Irr\_mode = Off  
 Tri\_mode = Off  
 Dante\_preat = FALSE  
 Initial\_wait = 1 [s]  
 Recvr\_gain = 36  
 Relaxation\_delay = 5 [s]  
 Repetition\_time = 9.36731904 [s]  
 Temp\_get = 24 [dC]

X: parts per Million: 1H

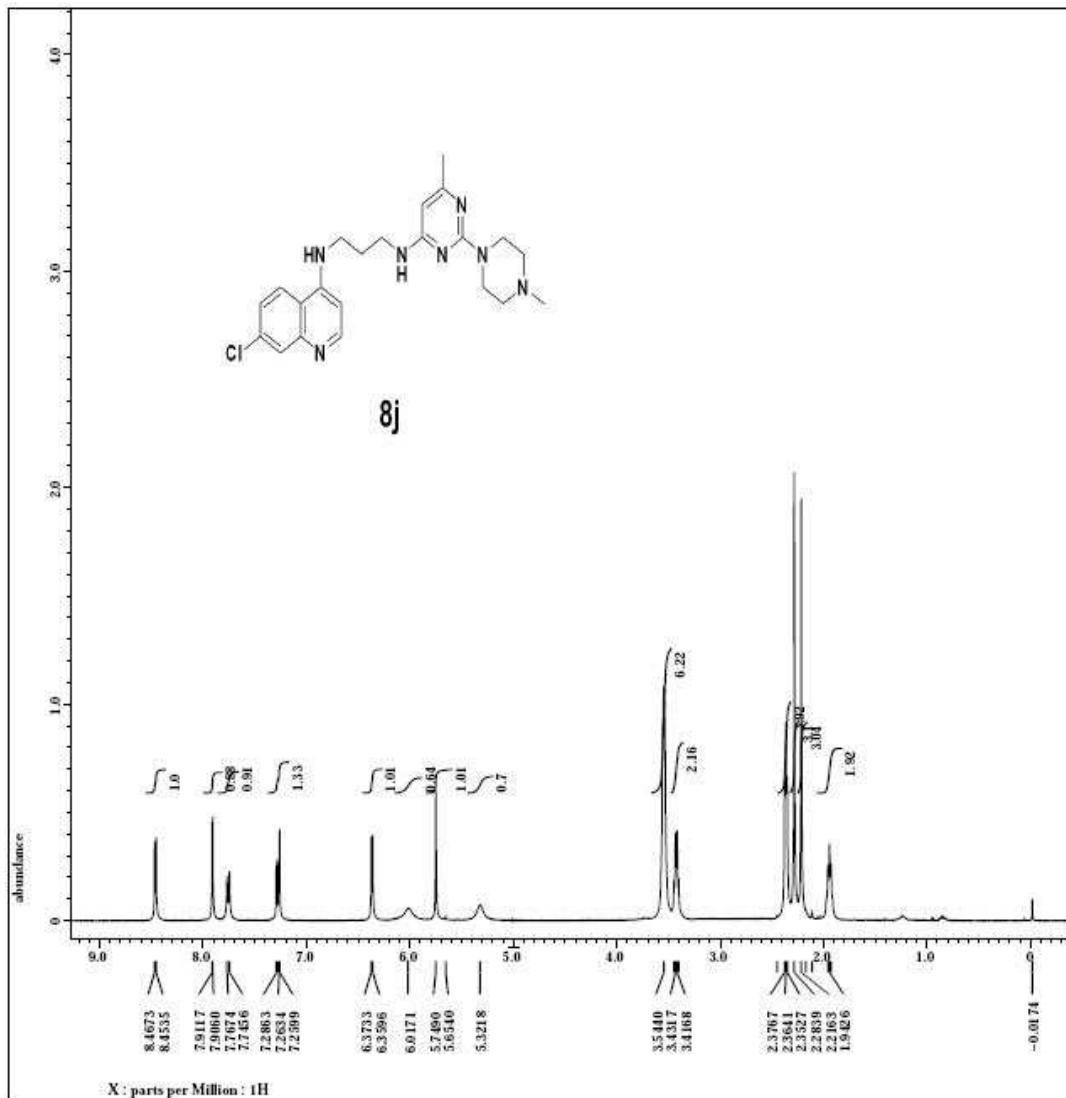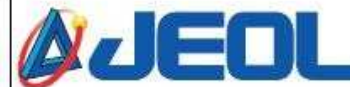

Filename = DSR\_SM-494\_PROTON-5.j  
 Author = delta  
 Experiment = single\_pulse.ex2  
 Sample\_id = DSR\_SM-494  
 Solvent = CHLOROFORM-D  
 Creation\_time = 8-JUN-2010 15:47:54  
 Revision\_time = 8-JUN-2010 14:52:54  
 Current\_time = 8-JUN-2010 14:54:02

Comment = DSR\_SM-494  
 Data\_format = 1D\_COMPLEX  
 Dia\_size = 13107  
 Dia\_title = 1H  
 Dia\_units = [ppm]  
 Dimensions = X  
 Site = HCl 400P  
 Spectrometer = DELTA2\_NMR

Field\_strength = 9.389766 [T] (400 [MHz])  
 X\_acq\_duration = 2.18365952 [e]  
 X\_domain = 1H  
 X\_freq = 399.78219838 [MHz]  
 X\_offset = 5 [ppm]  
 X\_points = 16384  
 X\_prescans = 1  
 X\_resolution = 0.45794685 [Hz]  
 X\_sweep = 7.5030012 [kHz]  
 Iir\_domain = 1H  
 Iir\_freq = 399.78219838 [MHz]  
 Iir\_offset = 5 [ppm]  
 Tri\_domain = 1H  
 Tri\_freq = 399.78219838 [MHz]  
 Tri\_offset = 5 [ppm]  
 Clipped = FALSE  
 Mod\_return = 1  
 Scans = 16  
 Total\_scans = 16

X\_90\_width = 11.5 [use]  
 X\_acq\_time = 2.18365952 [e]  
 X\_angle = 45 [deg]  
 X\_atn = 0.99 [dB]  
 X\_pulse = 5.75 [use]  
 Iir\_mode = Off  
 Tri\_mode = Off  
 Datto\_present = FALSE  
 Initial\_wait = 1 [e]  
 Recvr\_gain = 34  
 Relaxation\_delay = 4 [e]  
 Repetition\_time = 6.18365952 [e]  
 Temp\_get = 23.6 [deg]

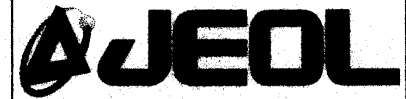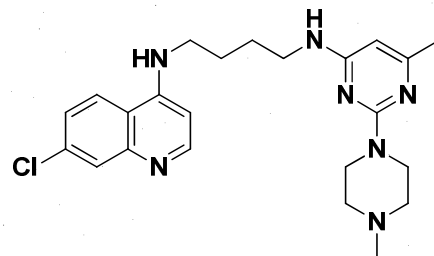

8k

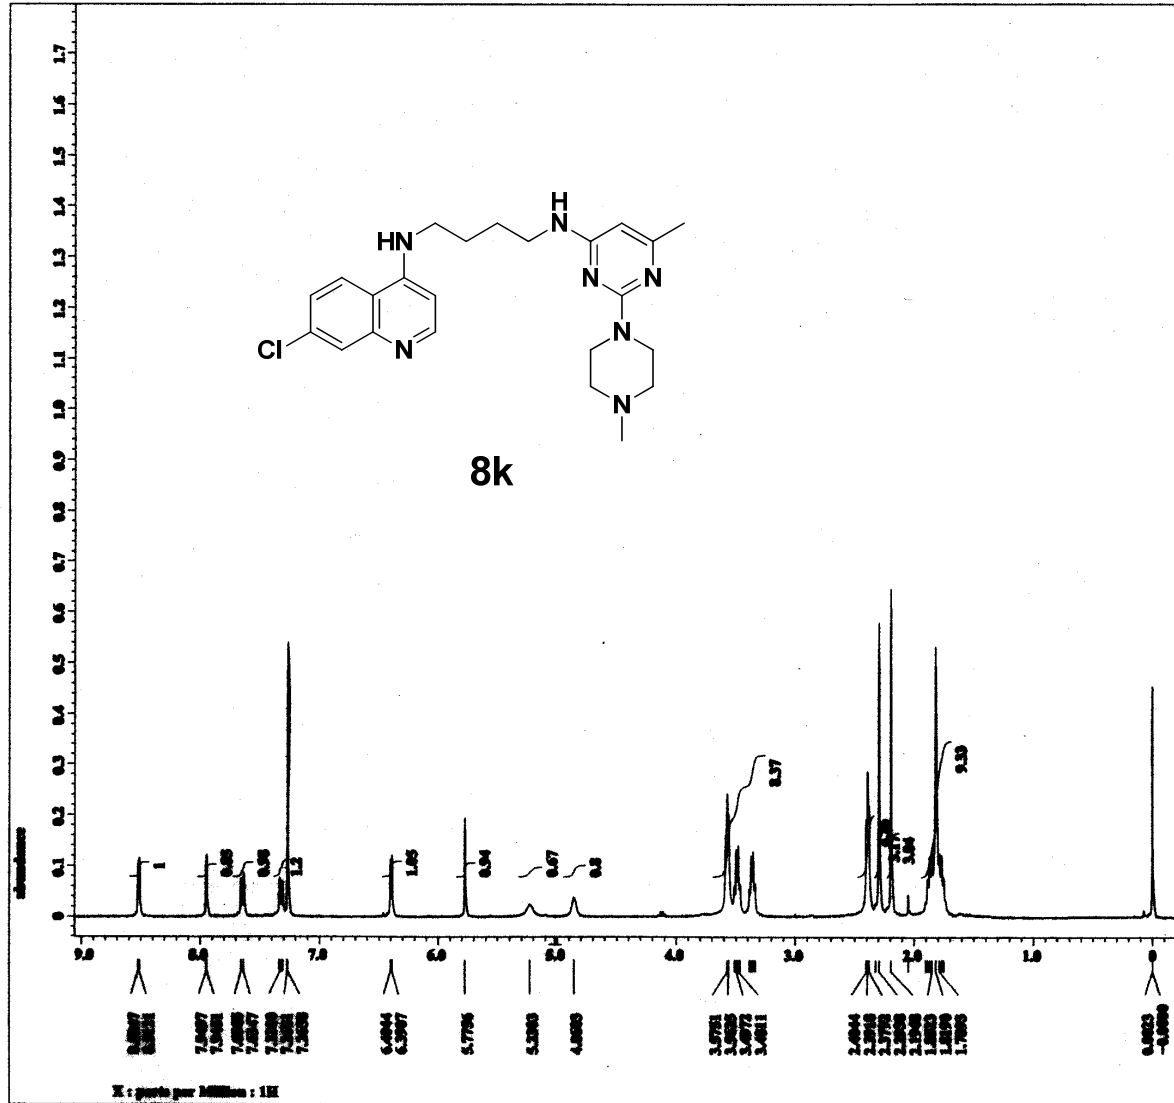

```

Filename      = NMR_00-001_P0000-6.)
Aqthor       = delta
Experiment   = single_pulse_002
Sample_ID    = NMR_00-001
Solvent      = CDCl3(000000-0)
Acquisition_time = 17-JUN-2010 13:57:15
Revision     = 17-JUN-2010 15:48:15
Current_Time = 17-JUN-2010 15:48:48

Comment      = NMR_00-001
Data_Format  = 1D COMPLEX
Bin_Width    = 13197
Bin_Width    = 13
Bin_Width    = 8 [ppm]
Simulation   = F
Site         = NMR 400P
Spectrometer = NMR2AS_NMR

Field_Strength = 400.146400 [MHz]
X_acq_duration = 2.18368982 [s]
X_domain      = 13
X_freq       = 399.78219830 [MHz]
X_offset     = 8 [ppm]
X_points     = 16384
X_processing = 1
X_resolution = 0.48794488 [Hz]
X_sweep      = 7.5839018 [Hz]
XV_domain    = 13
XV_freq     = 399.78219830 [MHz]
XV_offset   = 8 [ppm]
XV_domain   = 13
XV_freq     = 399.78219830 [MHz]
XV_offset   = 8 [ppm]
Clipped     = FALSE
Mod_return  = 1
Sca     = 16
Total_sca   = 16

X_90_width  = 13.5 [ns]
X_acq_time  = 2.18368982 [s]
X_angle     = 45 [deg]
X_pulse     = 8.99 [ns]
X_pulse     = 8.78 [ns]
XV_pulse    = 062
XV_pulse    = 062
Pulse_program = zgpg30
Pulse_program = 1 [s]
Pulse_program = 1 [s]
Pulse_program = 1 [s]
Pulse_program = 4 [s]
Repetition_time = 6.28368982 [s]
Temp_get    = 20.6 [degC]
  
```

X : ppm per MHz : 13

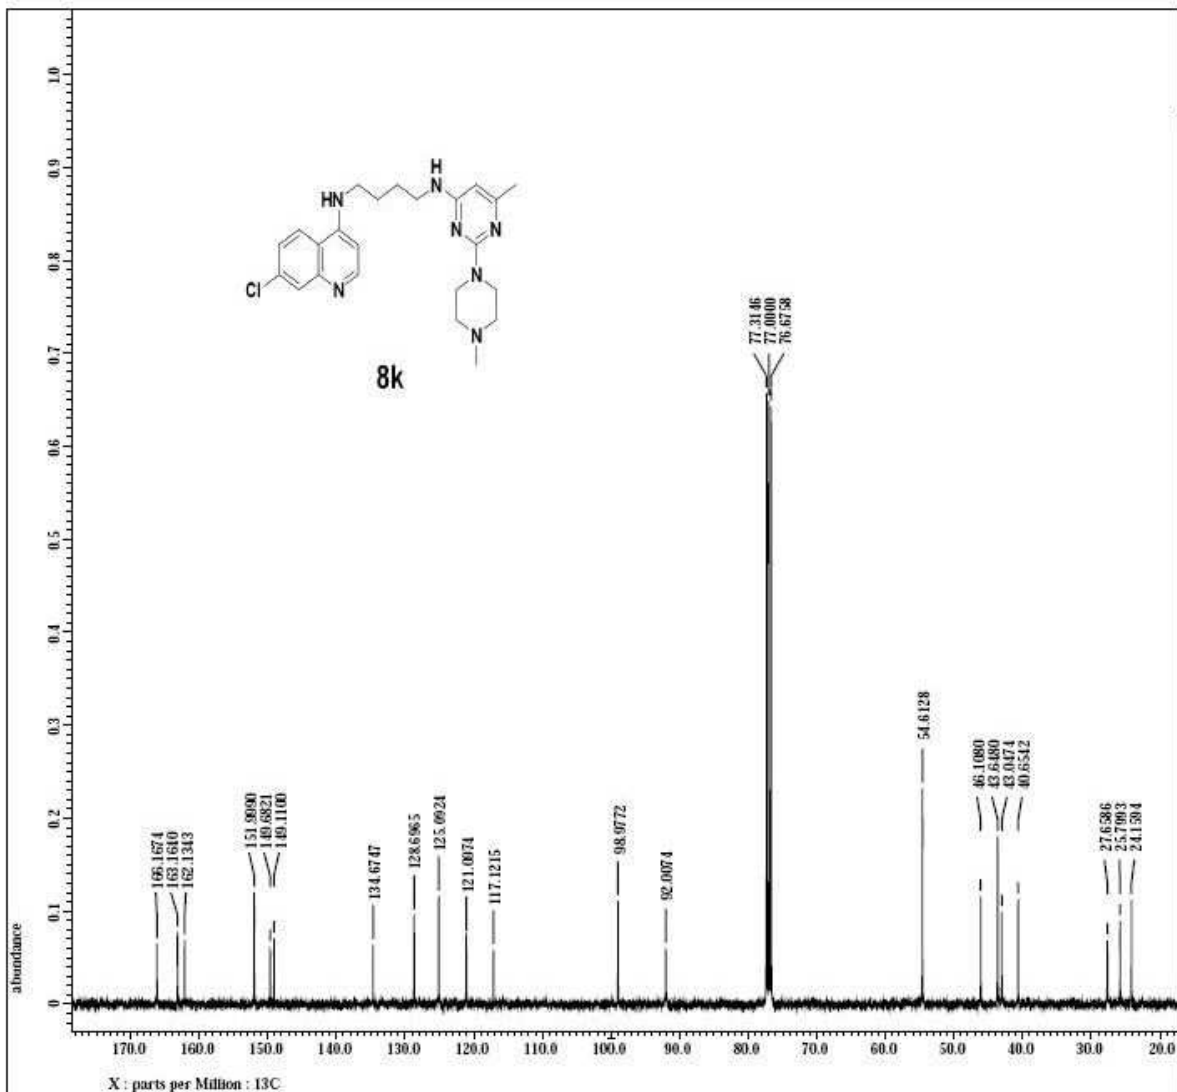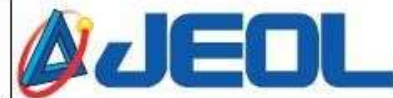

Filename - DSR\_SM-501\_CARBON-3.j  
 Author - delta  
 Experiment - single\_pulse\_dec  
 Sample\_id - DSR\_SM-501  
 Solvent - CHLOROFORM-D  
 Creation\_time - 4-DEC-2010 02:56:53  
 Revision\_time - 3-DEC-2010 23:27:09  
 Current\_time - 23-JUN-2011 23:09:16

Comment - DSR\_SM-501  
 Data\_format - 1D\_COMPLEX  
 Dim\_size - 26214  
 Dim\_title - 13c  
 Dim\_units - [ppm]  
 Dimensions - 1  
 Site - ECI 400F  
 Spectrometer - DELTA2\_NMR

Field\_strength - 9.389766 [T] (400 [MHz])  
 X\_acq\_duration - 1.04333312 [s]  
 X\_domain - 13c  
 X\_freq - 100.52530333 [MHz]  
 X\_offset - 100 [ppm]  
 X\_points - 32768  
 X\_prescans - 4  
 X\_resolution - 0.95846665 [Hz]  
 X\_sweep - 31.40703518 [kHz]  
 Irr\_domain - 1H  
 Irr\_freq - 399.78219838 [MHz]  
 Irr\_offset - 5 [ppm]  
 Clipped - FALSE  
 Mod\_return - 1  
 Scans - 750  
 Total\_scans - 750

X\_90\_width - 11.75 [us]  
 X\_acq\_time - 1.04333312 [s]  
 X\_angle - 30 [deg]  
 X\_atn - 10 [dB]  
 X\_pulse - 3.91666667 [us]  
 Irr\_atn\_dec - 24.95 [dB]  
 Irr\_atn\_noc - 24.95 [dB]  
 Irr\_noise - WALTZ  
 Decoupling - TRUE  
 Initial\_wait - 1 [s]  
 Noe - TRUE  
 Noe\_time - 2 [s]  
 Recvr\_gain - 60  
 Relaxation\_delay - 2 [s]  
 Repetition\_time - 3.04333312 [s]  
 Temp\_get - 22.1 [dc]





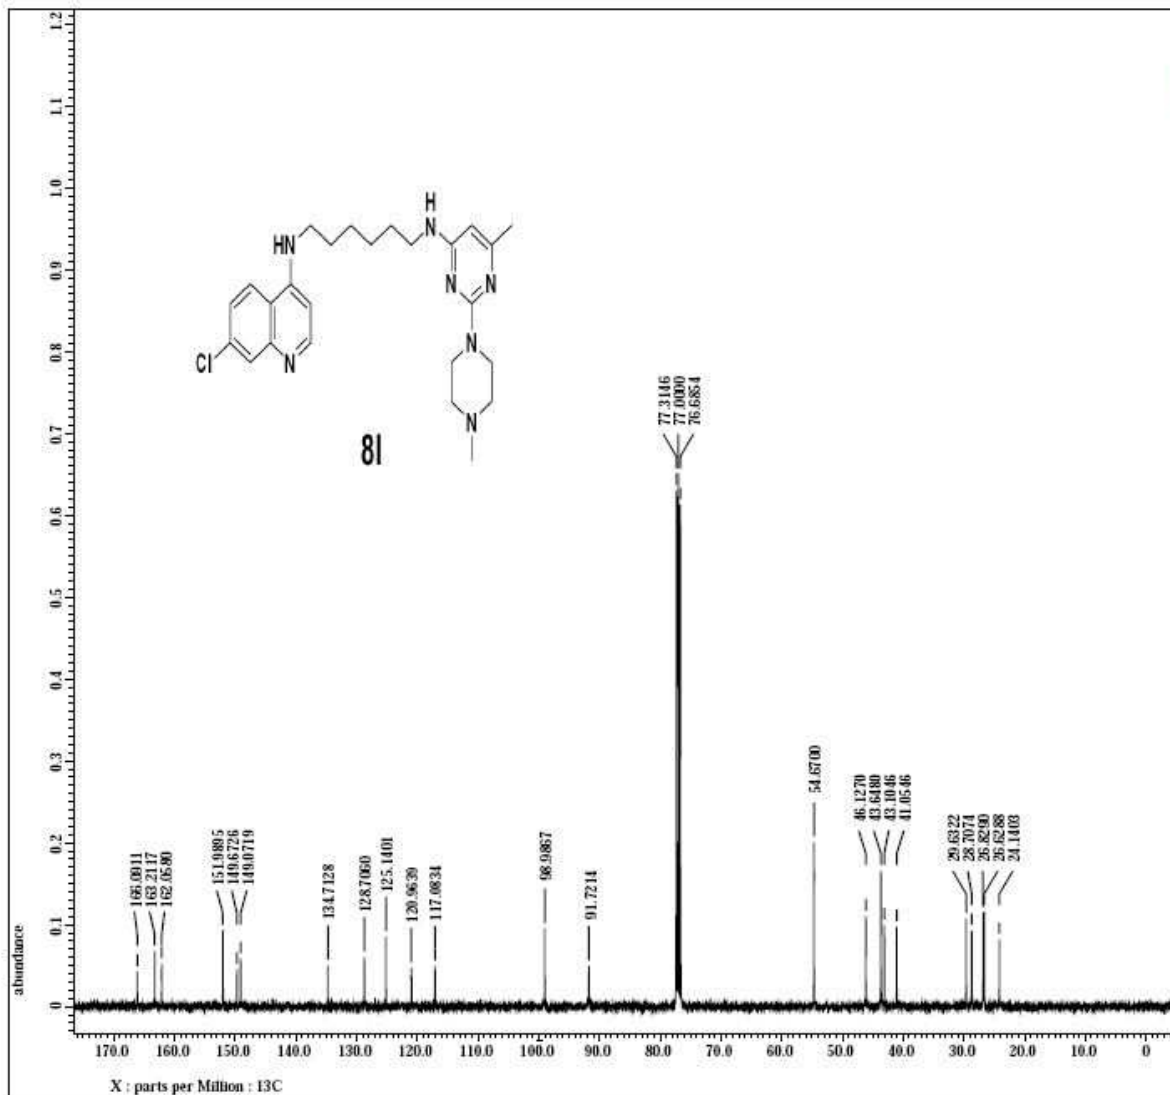


|                  |                            |
|------------------|----------------------------|
| Filename         | - DSR_SM-507_CARBON-3.j    |
| Author           | - delta                    |
| Experiment       | - single_pulse_dec         |
| Sample_id        | - DSR_SM-507               |
| Solvent          | - CHLOROFORM-D             |
| Creation_time    | - 8-DEC-2010 01:59:14      |
| Revision_time    | - 7-DEC-2010 22:29:22      |
| Current_time     | - 23-JUN-2011 23:24:51     |
| Comment          | - DSR_SM-507               |
| Data_format      | - 1D_COMPLEX               |
| Dim_size         | - 26214                    |
| Dim_title        | - 13c                      |
| Dim_units        | - [ppm]                    |
| Dimension        | - 1                        |
| Site             | - ECI 400P                 |
| Spectrometer     | - DELTA2_HMR               |
| Field_strength   | - 9.389766 [T] (400 [MHz]) |
| X_acq_duration   | - 1.04333312 [s]           |
| X_domain         | - 13c                      |
| X_freq           | - 100.52530333 [MHz]       |
| X_offset         | - 100 [ppm]                |
| X_points         | - 32769                    |
| X_prescans       | - 4                        |
| X_resolution     | - 0.95846665 [Hz]          |
| X_sweep          | - 31.40703518 [kHz]        |
| Irr_domain       | - 1H                       |
| Irr_freq         | - 399.78219838 [MHz]       |
| Irr_offset       | - 5 [ppm]                  |
| Clipped          | - FALSE                    |
| Mod_return       | - 1                        |
| Scans            | - 750                      |
| Total_scans      | - 750                      |
| X_90_width       | - 11.75 [us]               |
| X_acq_time       | - 1.04333312 [s]           |
| X_angle          | - 30 [deg]                 |
| X_atn            | - 10 [dB]                  |
| X_pulse          | - 3.91666667 [us]          |
| Irr_atn_dec      | - 24.95 [dB]               |
| Irr_atn_noc      | - 24.95 [dB]               |
| Irr_noise        | - WALTZ                    |
| Decoupling       | - TRUE                     |
| Initial_wait     | - 1 [s]                    |
| Noe              | - TRUE                     |
| Noe_time         | - 2 [s]                    |
| Recvr_gain       | - 60                       |
| Relaxation_delay | - 2 [s]                    |
| Repetition_time  | - 3.04333312 [s]           |
| Temp_get         | - 21.4 [dc]                |



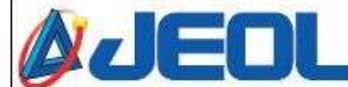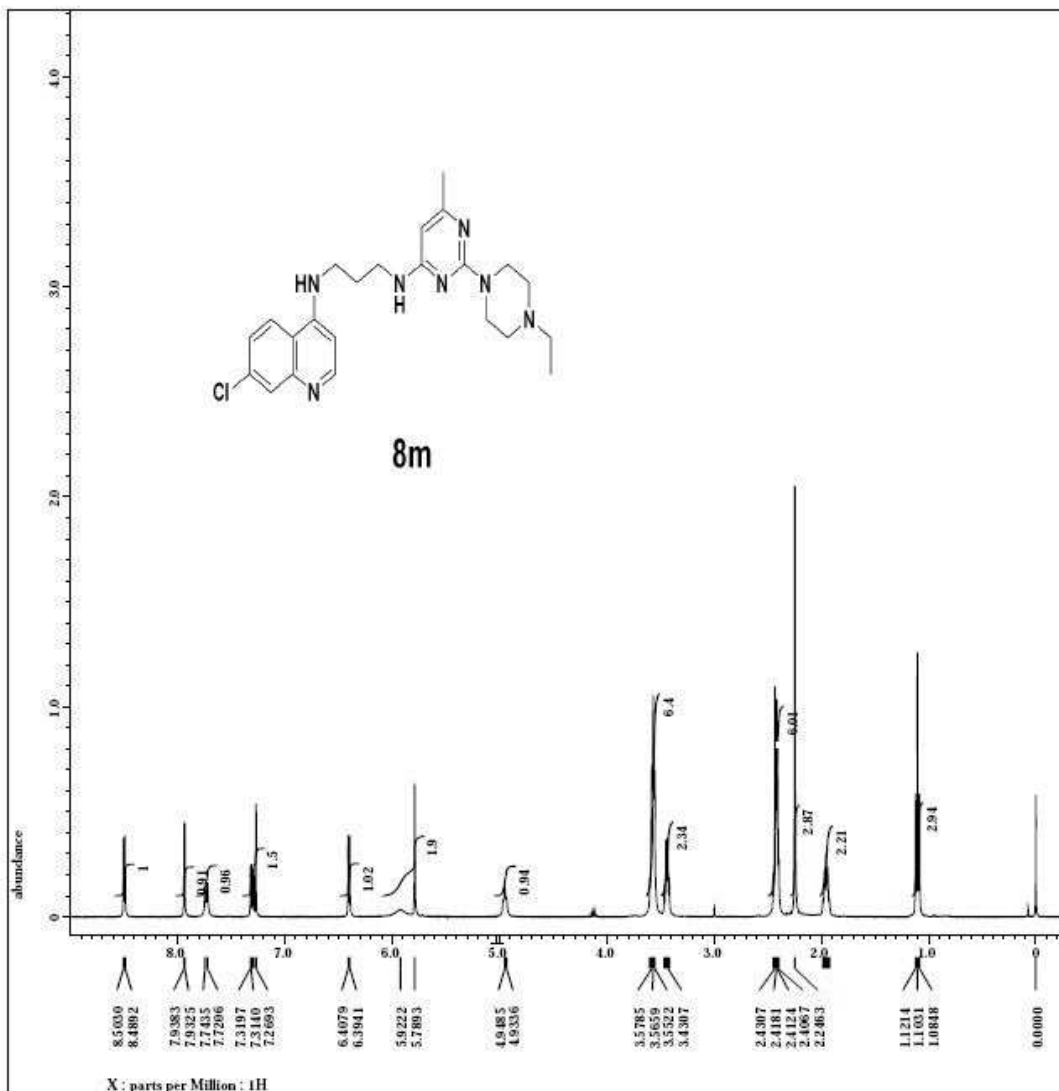

Filename - DSE\_SM-497A\_PROTON-6.  
Author - delta  
Experiment - single\_pulse.exe  
Sample\_id - DSE\_SM-497A  
Solvent - CHLOROFORM-D  
Creation\_time - 14-JUN-2010 16:31:05  
Revision\_time - 14-JUN-2010 15:58:30  
Current\_time - 14-JUN-2010 15:58:59

Comment - DSE\_SM-497A  
Data\_format - 1D\_COMPLEX  
Dia\_size - 13107  
Dia\_title - 1H  
Dia\_units - [ppm]  
Dimensions - 2  
Site - ECI 400P  
Spectrometer - DELTA2\_NMR

Field\_strength - 9.389766 [T] (400 [MHz])  
K\_acq\_duration - 2.18365952 [s]  
K\_domain - 1H  
K\_freq - 399.78219838 [MHz]  
K\_offset - 5 [ppm]  
K\_points - 16384  
K\_preprocs - 1  
K\_resolution - 0.45794685 [Hz]  
K\_sweep - 7.5030012 [kHz]  
IR\_domain - 1H  
IR\_freq - 399.78219838 [MHz]  
IR\_offset - 5 [ppm]  
TRI\_domain - 1H  
TRI\_freq - 399.78219838 [MHz]  
TRI\_offset - 5 [ppm]  
Clipped - FALSE  
Mod\_return - 1  
Scans - 16  
Total\_scans - 16

K\_90\_width - 11.5 [usec]  
K\_acq\_time - 2.18365952 [s]  
K\_angle - 45 [deg]  
K\_atn - 0.99 [dB]  
K\_pulse - 5.75 [usec]  
IRF\_mode - Off  
TRI\_mode - Off  
Pente\_preset - FALSE  
Initial\_wait - 3 [s]  
Recvr\_gain - 36  
Relaxation\_delay - 4 [s]  
Repetition\_time - 6.18365952 [s]  
Temp\_get - 24.5 [degC]

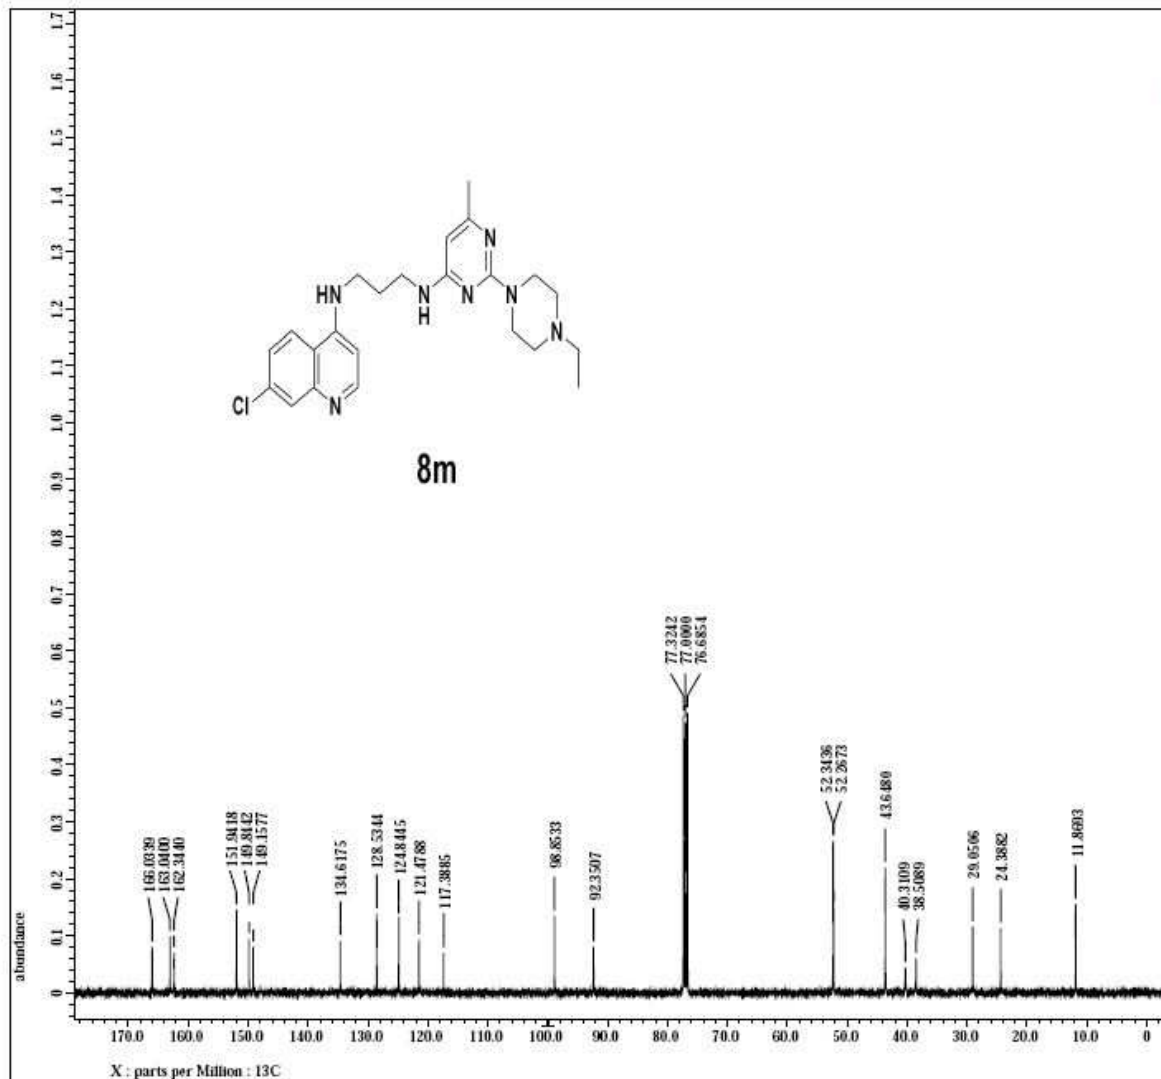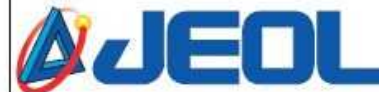

Filename - DSR SM-497\_CARBON-4.j  
 Author - delta  
 Experiment - single\_pulse\_dec  
 Sample\_id - DSR SM-497  
 Solvent - CHLOROFORM-D  
 Creation\_time - 30-NOV-2010 21:46:36  
 Revision\_time - 1-DEC-2010 22:20:11  
 Current\_time - 1-DEC-2010 22:20:59

Comment - DSR SM-497  
 Data\_format - 1D COMPLEX  
 Dim\_size - 25214  
 Dim\_title - 13C  
 Dim\_units - [ppm]  
 Dimensions - X  
 Site - ECX 400P  
 Spectrometer - DELTA2\_NMR

Field\_strength - 9.389766 [T] (400 [MHz])  
 X\_acq\_duration - 1.04333312 [s]  
 X\_domain - 13C  
 X\_freq - 100.52530333 [MHz]  
 X\_offset - 100 [ppm]  
 X\_points - 32768  
 X\_prescans - 4  
 X\_resolution - 0.95846665 [Hz]  
 X\_sweep - 21.40703518 [kHz]  
 Irr\_domain - 1H  
 Irr\_freq - 399.78219838 [MHz]  
 Irr\_offset - 5 [ppm]  
 Clipped - FALSE  
 Mod\_return - 1  
 Scans - 750  
 Total\_scans - 750

X\_90\_width - 11.75 [us]  
 X\_acq\_time - 1.04333312 [s]  
 X\_angle - 30 [deg]  
 X\_atn - 10 [dB]  
 X\_pulse - 3.91666667 [us]  
 Irr\_atn\_dec - 24.95 [dB]  
 Irr\_atn\_noc - 24.95 [dB]  
 Irr\_noise - WALTZ  
 Decoupling - TRUE  
 Initial\_wait - 1 [s]  
 Noe - TRUE  
 Noe\_time - 2 [s]  
 Recvr\_gain - 53  
 Relaxation\_delay - 2 [s]  
 Repetition\_time - 3.04333312 [s]  
 Temp\_get - 22.4 [dc]

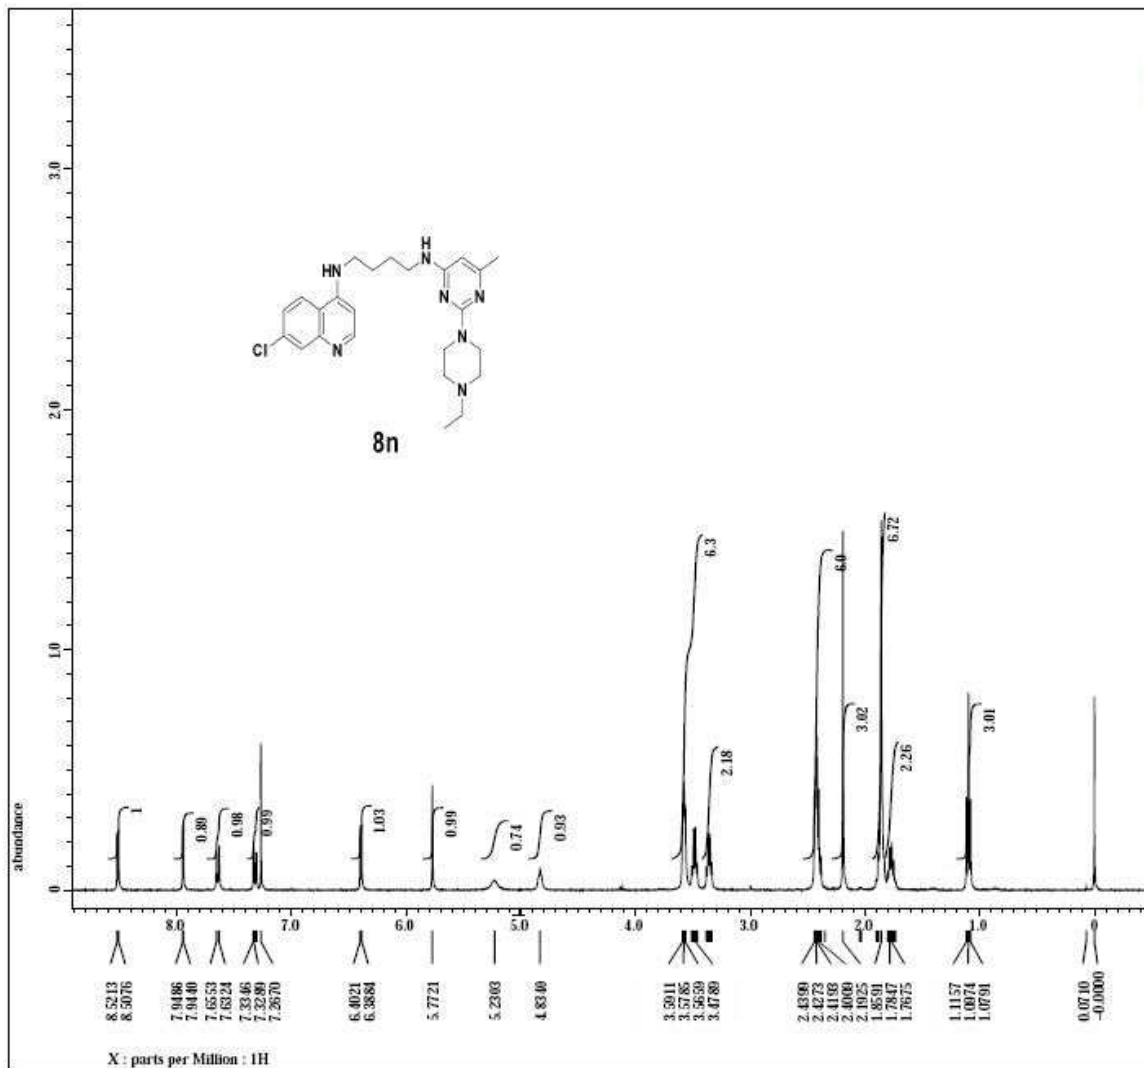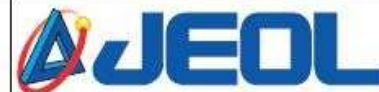

Filename = DSR\_SM-502\_PROTON-5.j  
 Author = delta  
 Experiment = single\_pulse.ex2  
 Sample\_id = DSR\_SM-502  
 Solvent = CHLOROFORM-D  
 Creation\_time = 21-JUN-2010 13:49:54  
 Revision\_time = 28-JUN-2010 10:44:36  
 Current\_time = 28-JUN-2010 10:44:58

Comment = DSR\_SM-502  
 Data\_format = 1D\_COMPLEX  
 Dim\_size = 13107  
 Dim\_title = 1H  
 Dim\_units = [ppm]  
 Dimensions = 2  
 Site = EX 400P  
 Spectrometer = DELTA2\_NMR

Field\_strength = 9.389766 [T] (400 [MHz])  
 X\_acq\_duration = 2.18365952 [s]  
 X\_domain = 1H  
 X\_freq = 399.78219838 [MHz]  
 X\_offset = 5 [ppm]  
 X\_points = 16384  
 X\_preprocs = 1  
 X\_resolution = 0.45794685 [Hz]  
 X\_sweep = 7.5030012 [kHz]  
 Ix\_domain = 1H  
 Ix\_freq = 399.78219838 [MHz]  
 Ix\_offset = 5 [ppm]  
 Tri\_domain = 1H  
 Tri\_freq = 399.78219838 [MHz]  
 Tri\_offset = 5 [ppm]  
 Clipped = FALSE  
 Mod\_return = 1  
 Scans = 16  
 Total\_scans = 16

X\_90\_width = 11.5 [us]  
 X\_acq\_time = 2.18365952 [s]  
 X\_angle = 45 [deg]  
 X\_atn = 0.98 [dB]  
 X\_pulse = 5.75 [us]  
 Ix\_mode = off  
 Tri\_mode = off  
 Dante\_preac = FALSE  
 Initial\_wait = 1 [s]  
 Recvr\_gain = 42  
 Relaxation\_delay = 4 [s]  
 Repetition\_time = 6.18365952 [s]  
 Temp\_get = 21.7 [dc]

**6a; 98.61 %**

**Chromatogram**

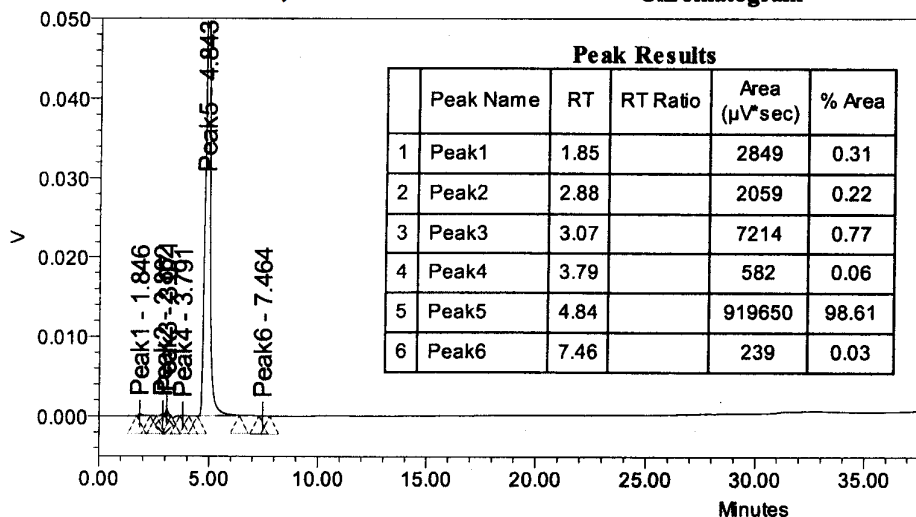

**6b: 98.44 %**

**Chromatogram**

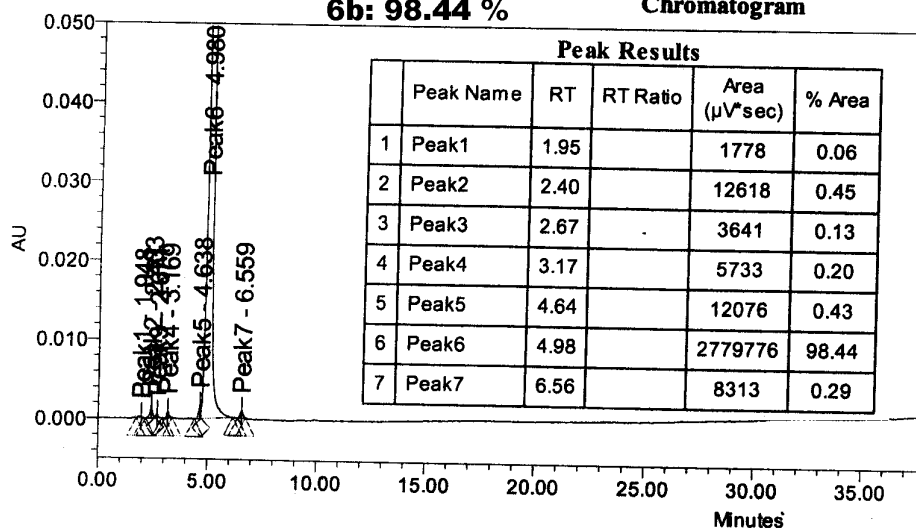

6c; 99.02 %

Chromatogram

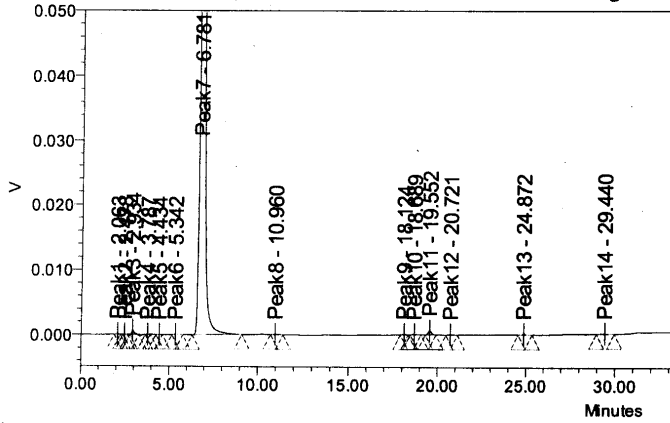

Peak Results

|    | Peak Name | RT    | RT Ratio | Area (μV <sup>2</sup> sec) | % Area |
|----|-----------|-------|----------|----------------------------|--------|
| 1  | Peak1     | 2.06  |          | 664                        | 0.03   |
| 2  | Peak2     | 2.48  |          | 186                        | 0.01   |
| 3  | Peak3     | 2.93  |          | 5624                       | 0.27   |
| 4  | Peak4     | 3.79  |          | 166                        | 0.01   |
| 5  | Peak5     | 4.43  |          | 210                        | 0.01   |
| 6  | Peak6     | 5.34  |          | 577                        | 0.03   |
| 7  | Peak7     | 6.78  |          | 2064967                    | 99.02  |
| 8  | Peak8     | 10.96 |          | 564                        | 0.03   |
| 9  | Peak9     | 18.12 |          | 857                        | 0.04   |
| 10 | Peak10    | 18.69 |          | 624                        | 0.03   |
| 11 | Peak11    | 19.55 |          | 8048                       | 0.39   |
| 12 | Peak12    | 20.72 |          | 627                        | 0.03   |
| 13 | Peak13    | 24.87 |          | 1285                       | 0.06   |
| 14 | Peak14    | 29.44 |          | 1036                       | 0.05   |

6d; 97.17 %

Chromatogram

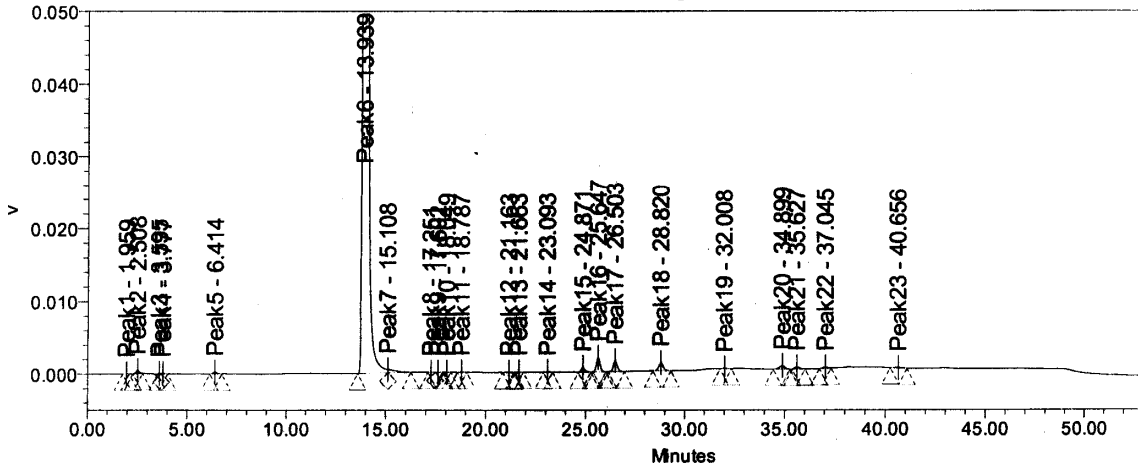

Peak Results

|    | Peak Name | RT    | RT Ratio | Area (μV <sup>2</sup> sec) | % Area |
|----|-----------|-------|----------|----------------------------|--------|
| 1  | Peak1     | 1.96  |          | 296                        | 0.01   |
| 2  | Peak2     | 2.51  |          | 4703                       | 0.12   |
| 3  | Peak3     | 3.60  |          | 665                        | 0.02   |
| 4  | Peak4     | 3.78  |          | 833                        | 0.02   |
| 5  | Peak5     | 6.41  |          | 3240                       | 0.08   |
| 6  | Peak6     | 13.94 |          | 3829961                    | 97.17  |
| 7  | Peak7     | 15.11 |          | 12004                      | 0.30   |
| 8  | Peak8     | 17.25 |          | 192                        | 0.00   |
| 9  | Peak9     | 17.60 |          | 283                        | 0.01   |
| 10 | Peak10    | 18.05 |          | 204                        | 0.01   |
| 11 | Peak11    | 18.79 |          | 526                        | 0.01   |
| 12 | Peak12    | 21.16 |          | 576                        | 0.01   |
| 13 | Peak13    | 21.66 |          | 425                        | 0.01   |
| 14 | Peak14    | 23.09 |          | 299                        | 0.01   |

|    | Peak Name | RT    | RT Ratio | Area (μV <sup>2</sup> sec) | % Area |
|----|-----------|-------|----------|----------------------------|--------|
| 15 | Peak15    | 24.87 |          | 7383                       | 0.19   |
| 16 | Peak16    | 25.65 |          | 24543                      | 0.62   |
| 17 | Peak17    | 26.50 |          | 20190                      | 0.51   |
| 18 | Peak18    | 28.82 |          | 16687                      | 0.42   |
| 19 | Peak19    | 32.01 |          | 615                        | 0.02   |
| 20 | Peak20    | 34.90 |          | 8828                       | 0.22   |
| 21 | Peak21    | 35.63 |          | 4569                       | 0.12   |
| 22 | Peak22    | 37.05 |          | 2684                       | 0.07   |
| 23 | Peak23    | 40.66 |          | 1633                       | 0.04   |

**7a; 98.76 %**

**Chromatogram**

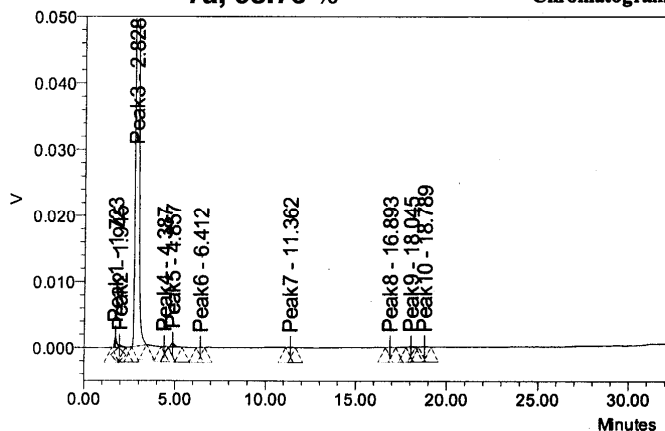

**Peak Results**

|    | Peak Name | RT    | RT Ratio | Area (μV*sec) | % Area |
|----|-----------|-------|----------|---------------|--------|
| 1  | Peak1     | 1.72  |          | 13108         | 0.60   |
| 2  | Peak2     | 1.95  |          | 3551          | 0.16   |
| 3  | Peak3     | 2.83  |          | 2153620       | 98.76  |
| 4  | Peak4     | 4.39  |          | 478           | 0.02   |
| 5  | Peak5     | 4.86  |          | 7907          | 0.36   |
| 6  | Peak6     | 6.41  |          | 355           | 0.02   |
| 7  | Peak7     | 11.36 |          | 261           | 0.01   |
| 8  | Peak8     | 16.89 |          | 321           | 0.01   |
| 9  | Peak9     | 18.04 |          | 376           | 0.02   |
| 10 | Peak10    | 18.79 |          | 746           | 0.03   |

**7d: 98.16 %**

**Chromatogram**

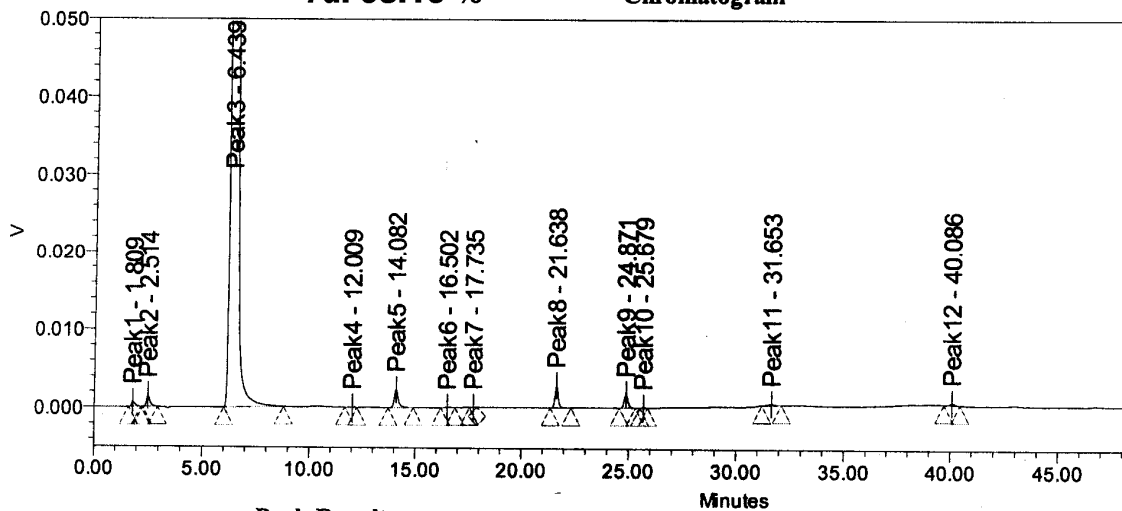

**Peak Results**

|    | Peak Name | RT    | RT Ratio | Area (μV*sec) | % Area |
|----|-----------|-------|----------|---------------|--------|
| 1  | Peak1     | 1.81  |          | 6690          | 0.11   |
| 2  | Peak2     | 2.51  |          | 15914         | 0.26   |
| 3  | Peak3     | 6.44  |          | 6017415       | 98.16  |
| 4  | Peak4     | 12.01 |          | 612           | 0.01   |
| 5  | Peak5     | 14.08 |          | 31038         | 0.51   |
| 6  | Peak6     | 16.50 |          | 321           | 0.01   |
| 7  | Peak7     | 17.74 |          | 320           | 0.01   |
| 8  | Peak8     | 21.64 |          | 29870         | 0.49   |
| 9  | Peak9     | 24.87 |          | 20706         | 0.34   |
| 10 | Peak10    | 25.68 |          | 207           | 0.00   |
| 11 | Peak11    | 31.65 |          | 3044          | 0.05   |
| 12 | Peak12    | 40.09 |          | 3972          | 0.06   |

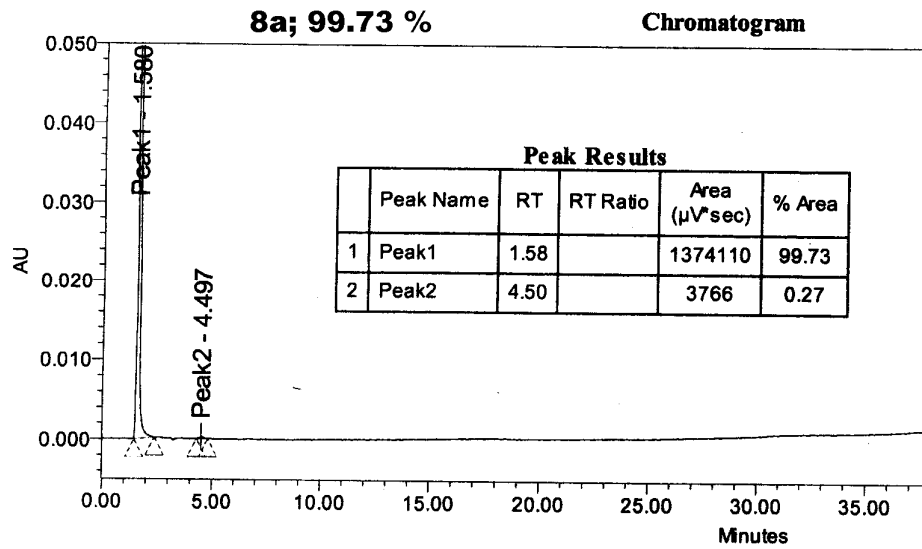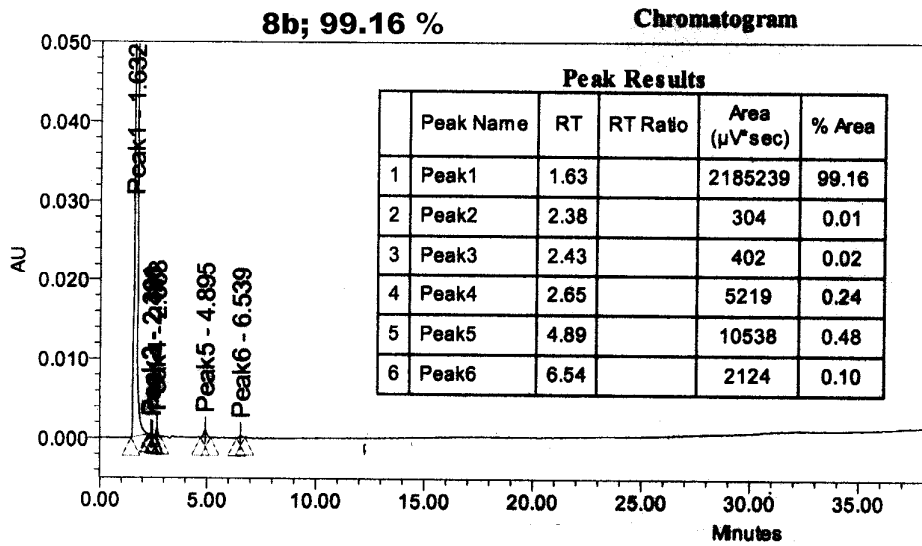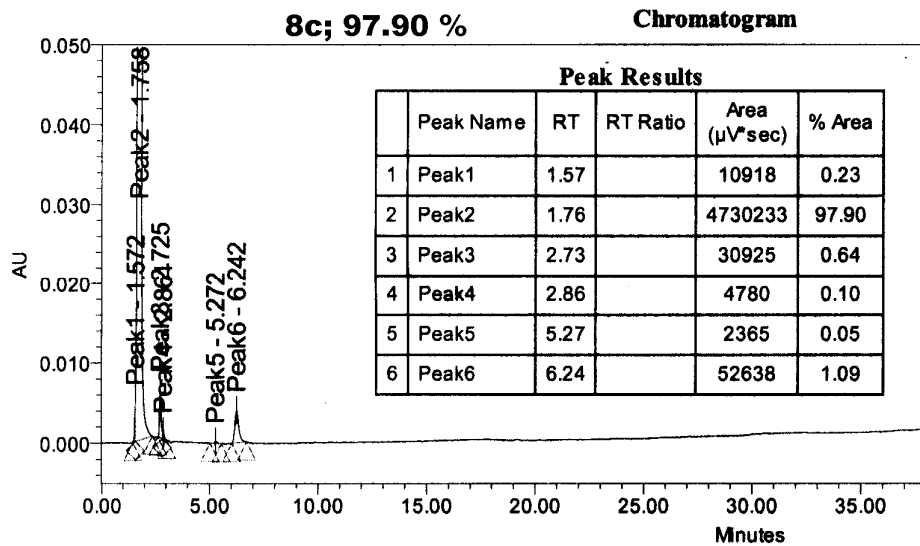

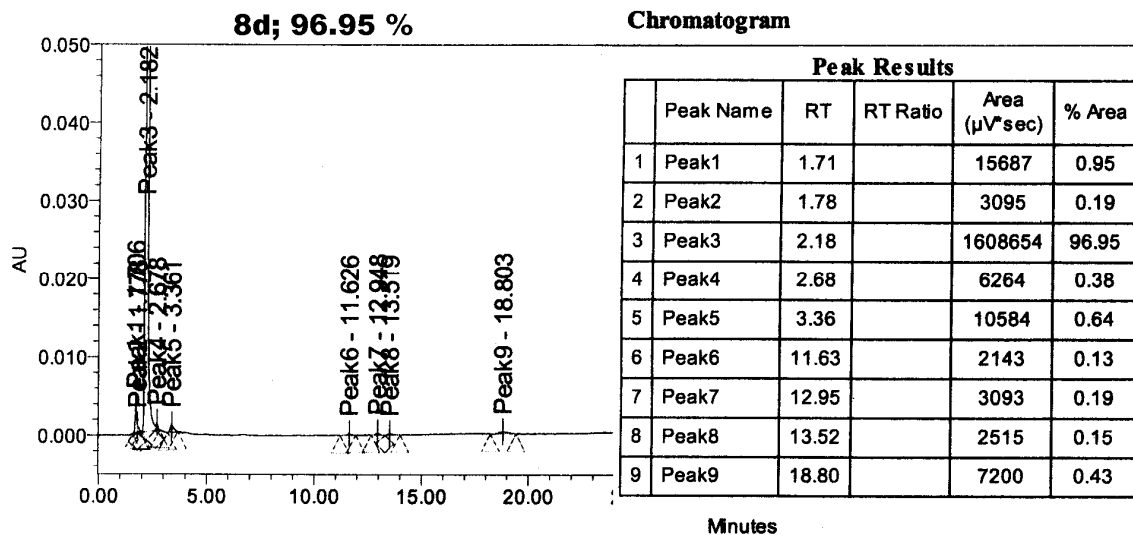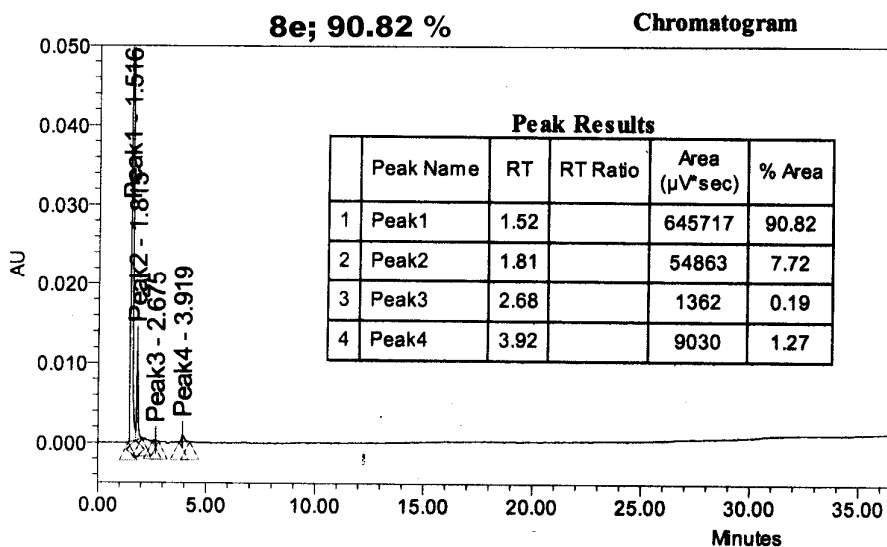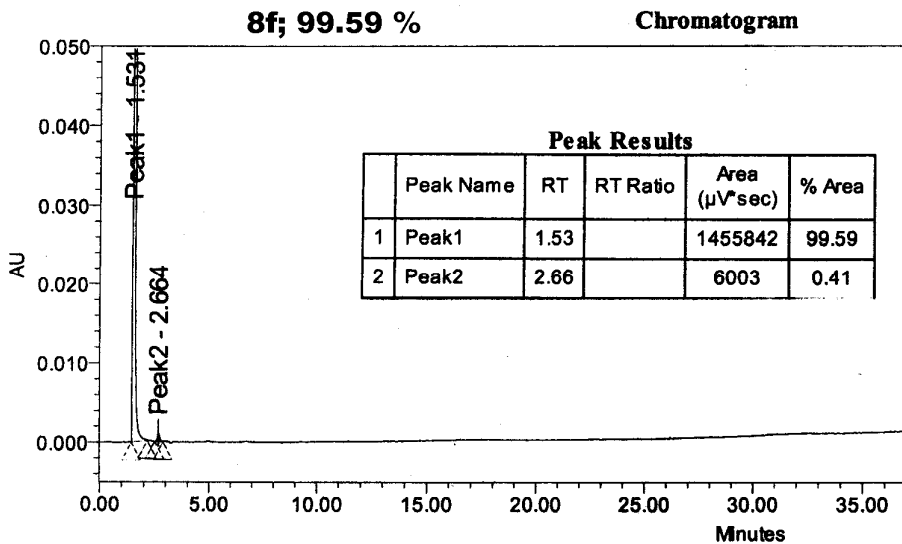



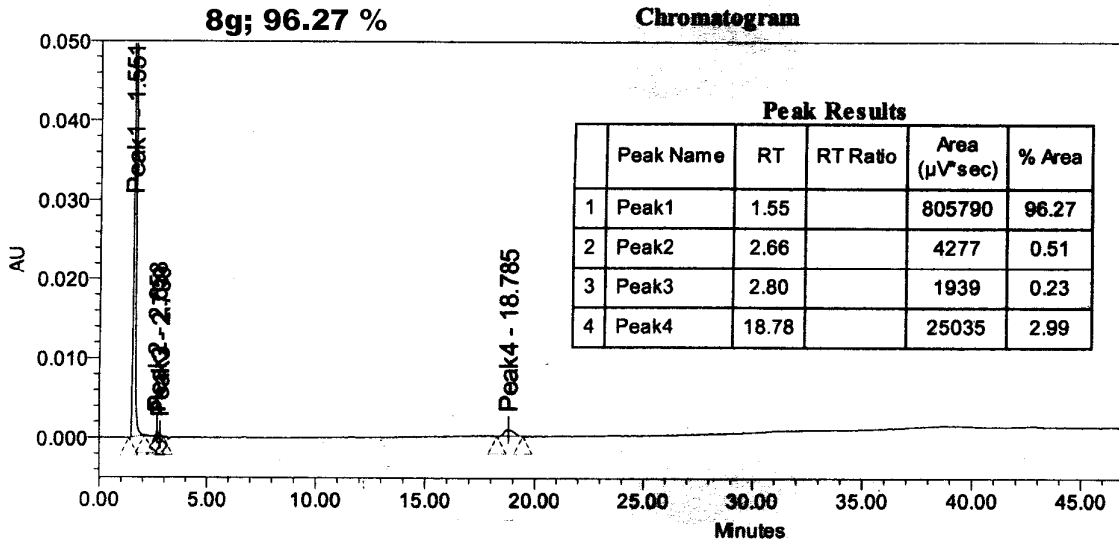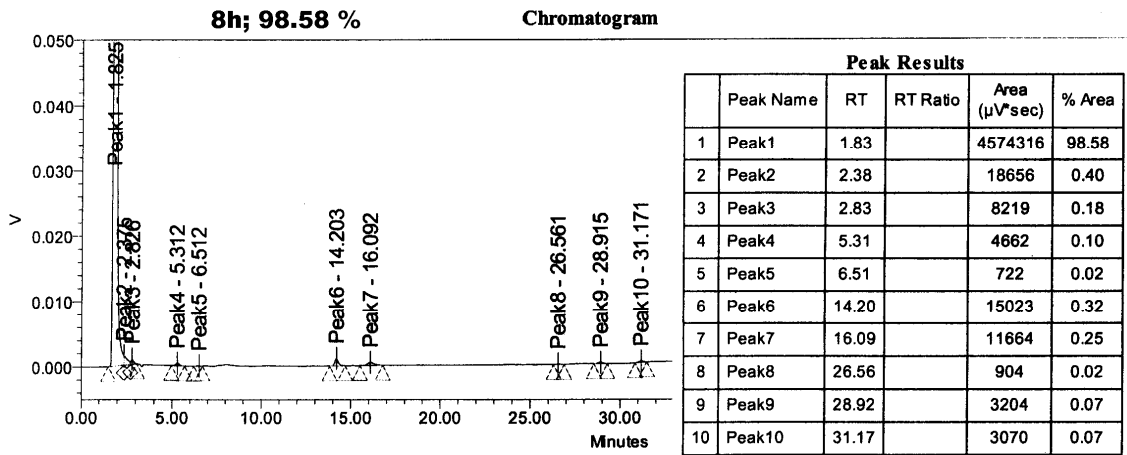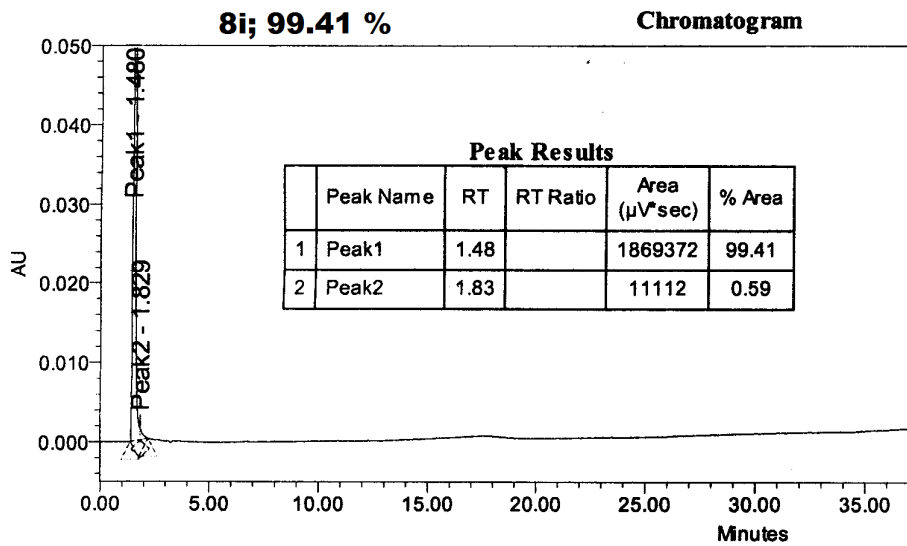

8j; 99.38 %

Chromatogram

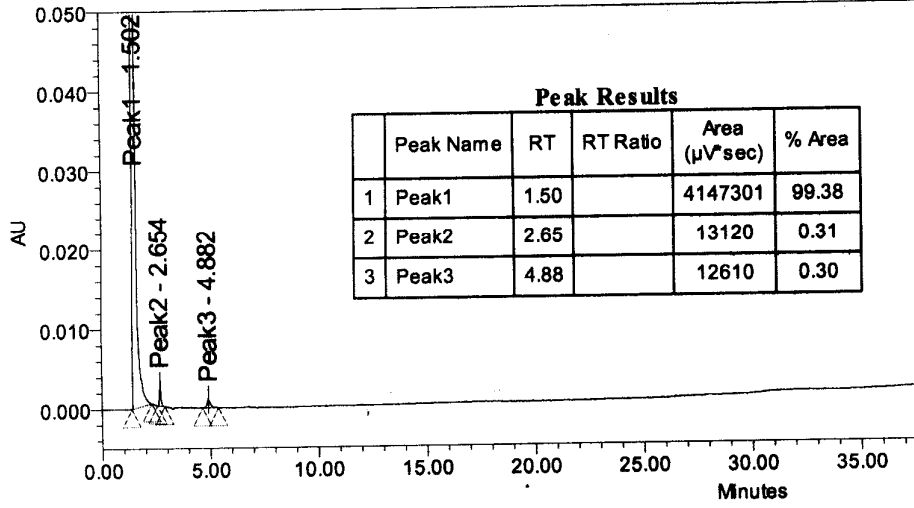

8k; 97.07 %

Chromatogram

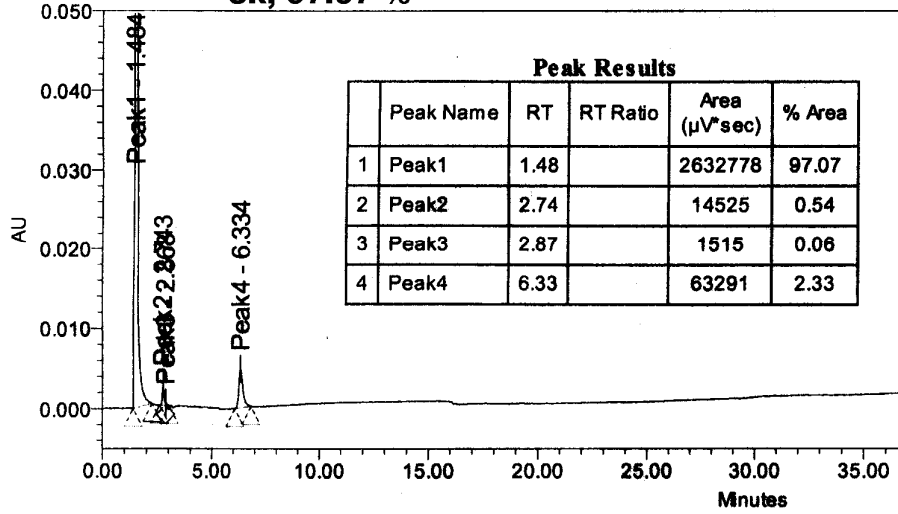

8l; 99.00 %

Chromatogram

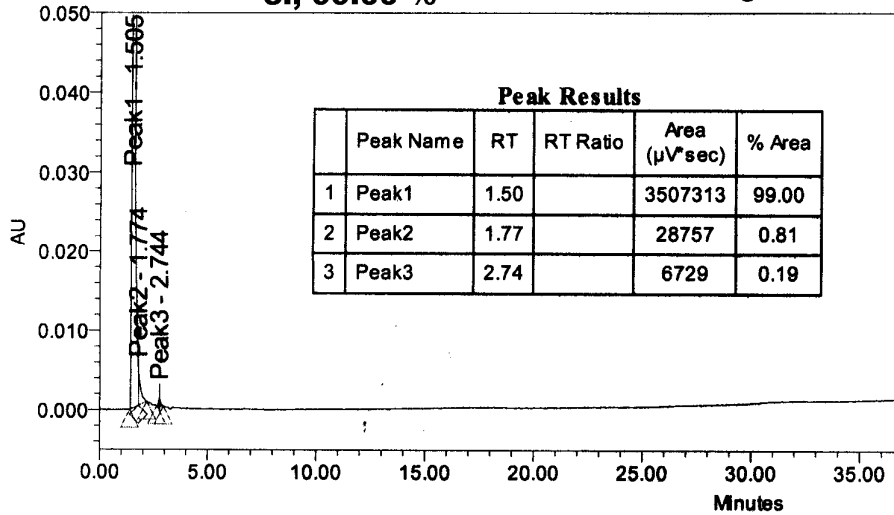

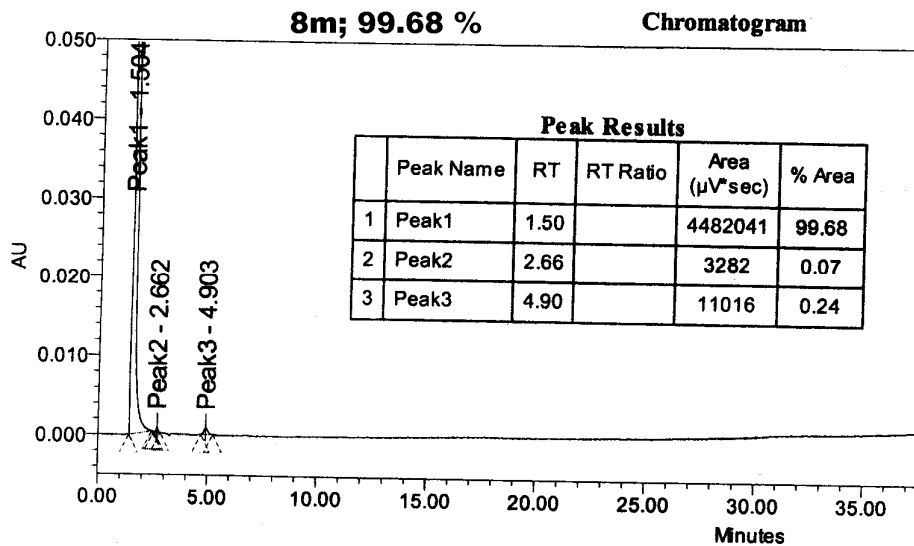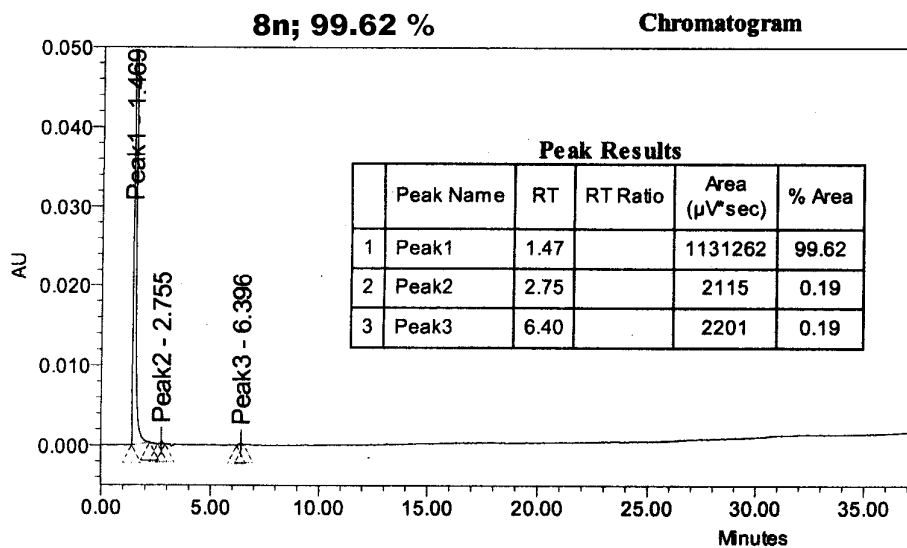

Supplement: ml3000808_si_001.pdf [file ml3000808_si_001.pdf]
